# Supplementary material for: Adaptation of Drosophila larva foraging in response to changes in food resources
Source: eLife. 2022 Dec 2;11:e75826. doi: 10.7554/eLife.75826 (PMC9822246; doi:10.7554/eLife.75826)
Supplement: Source data 1. [file elife-75826-data1.xlsx]

## Sheet: Homogeneous - Sitter
Sitter
ID	turning_rate	std_turning_rate	speed	std_speed	steps	std_steps	handedness	num_turns_min	std_num_turns_min	env	substrate	larva_type	frames_not_moving	recorded_frames	pause_proportion	dist_five_min	crawl_dist	pause_duration	total_turns
exp1_larva_0	0.330109	0.439101	0.634883	0.185606	17.6205	9.0763	-0.785714	1.82372	0.755089	Homogeneous	Agar	Sitter	126	5484	0.0229759	126.847	1698.87	4.5	86
exp1_larva_1	0.194514	0.262699	0.948428	0.215564	23.3326	16.2553	0.358025	1.96961	0.863295	Homogeneous	Agar	Sitter	11	4465	0.00246361	229.403	2107.91	1.22222	83
exp1_larva_2	0.214062	0.321755	0.837546	0.21423	21.9534	16.2028	0.493976	1.81469	0.858131	Homogeneous	Agar	Sitter	17	4735	0.00359029	185.507	1970.82	1.7	85
exp1_larva_3	0.42375	0.483618	0.667969	0.264315	12.5353	5.01486	0.575758	2.73979	0.913077	Homogeneous	Agar	Sitter	6	1433	0.00418702	191.853	475.623	1.2	35
exp1_larva_4	0.189114	0.261197	0.978362	0.210827	19.6596	17.2936	0.0103093	2.09822	1.09779	Homogeneous	Agar	Sitter	7	4902	0.00142799	270.956	2387.22	1.4	99
exp1_larva_5	0.201165	0.244759	0.988514	0.250758	15.8454	6.90291	-0.575758	3.36318	0.842895	Homogeneous	Agar	Sitter	9	1136	0.00792254	306.244	555.079	1.8	35
exp1_larva_6	0.266255	0.396411	0.850714	0.268509	18.1702	11.6121	-0.319588	2.32808	1.08547	Homogeneous	Agar	Sitter	67	4830	0.0138716	215.284	2023.52	2.91304	99
exp1_larva_7	0.30002	0.423279	1.05569	0.33575	13.8086	9.84713	0.0596026	3.38868	1.0398	Homogeneous	Agar	Sitter	43	4929	0.00872388	205.271	2572.9	2.52941	153
exp1_larva_8	0.250548	0.383783	0.978247	0.333055	18.1768	12.9818	0.0333333	2.67444	1.25703	Homogeneous	Agar	Sitter	26	2715	0.00957643	328.644	1311.4	1.73333	62
exp1_larva_9	0.205062	0.324956	0.937524	0.21918	25.9824	20.7846	0.297297	1.69363	0.946883	Homogeneous	Agar	Sitter	54	4601	0.0117366	229.914	2126.35	2.84211	76
exp2_larva_0	0.219789	0.362718	1.03583	0.303816	18.3211	11.01	-0.652174	2.89131	1.13159	Homogeneous	Agar	Sitter	43	5564	0.00772825	249.287	2855.9	2.38889	140
exp2_larva_1	0.175908	0.253246	0.951662	0.25341	13.2252	4.84336	-0.516129	3.95357	0.836869	Homogeneous	Agar	Sitter	10	5666	0.00176491	318.198	2687.97	2.5	188
exp2_larva_2	0.201418	0.305031	1.00755	0.278742	14.9313	6.34504	-0.737705	3.78245	0.97228	Homogeneous	Agar	Sitter	96	5917	0.0162244	326.463	2931.78	6.4	185
exp2_larva_3	0.178409	0.29656	1.02184	0.247766	13.7942	6.18401	-0.883598	3.85296	1.12564	Homogeneous	Agar	Sitter	23	5777	0.00398131	304.521	2936.8	3.28571	191
exp2_larva_4	0.217529	0.349644	1.09739	0.301441	16.4987	9.72609	-0.19403	3.223	0.893408	Homogeneous	Agar	Sitter	15	4745	0.00316122	316.662	2591.56	1.5	136
exp2_larva_5	0.231671	0.360819	1.12722	0.307331	20.1126	11.241	0.225352	2.9166	0.947631	Homogeneous	Agar	Sitter	19	5810	0.00327022	359.052	3261.95	2.71429	144
exp2_larva_6	0.147987	0.22511	1.17473	0.254516	21.7087	13.1443	-0.325843	2.83273	1.07584	Homogeneous	Agar	Sitter	10	3564	0.00280584	266.422	2080.56	1.11111	91
exp2_larva_7	0.232376	0.375524	1.01512	0.289662	18.4871	10.7394	-0.177305	2.90914	1.03672	Homogeneous	Agar	Sitter	29	5973	0.00485518	293.222	3014.46	1.8125	143
exp2_larva_8	0.201815	0.310785	1.10748	0.295275	14.3886	5.88461	0.754011	4.34824	1.20116	Homogeneous	Agar	Sitter	43	5241	0.00820454	329.266	2877.19	2.26316	189
exp2_larva_9										Homogeneous	Agar	Sitter	0	0		0	0		0
exp3_larva_0	0.175269	0.249032	0.93224	0.216662	24.2403	13.6006	0.809524	1.99487	0.76863	Homogeneous	Agar	Sitter	12	4958	0.00242033	243.733	2303.59	2.4	86
exp3_larva_1	0.230843	0.290143	0.747205	0.191244	18.3739	11.3345	0.728155	2.19136	0.851631	Homogeneous	Agar	Sitter	11	5494	0.00200218	194.175	2045.88	1.375	105
exp3_larva_2	0.212132	0.282335	0.972794	0.245541	14.0507	5.74888	0.889571	3.82144	0.985483	Homogeneous	Agar	Sitter	45	5070	0.00887574	306.689	2440.74	3.46154	165
exp3_larva_3	0.230247	0.293767	1.05723	0.292839	15.1992	4.43098	0.978723	4.0622	0.902412	Homogeneous	Agar	Sitter	47	5663	0.00829949	104.237	2966.16	2.35	190
exp3_larva_4	0.262288	0.346666	0.736814	0.220528				1.67892	0.850229	Homogeneous	Agar	Sitter	1	933	0.00107181	205.895	342.987	1	15
exp3_larva_5	0.169073	0.260865	1.0145	0.211212	30.7075	24.6757	0.123288	1.5707	0.846463	Homogeneous	Agar	Sitter	4	5117	0.000781708	209.951	2590.55	1.33333	75
exp3_larva_6	0.230261	0.30379	0.962847	0.23424	18.6056	10.2289	0.522124	2.57985	0.857712	Homogeneous	Agar	Sitter	39	4595	0.00848749	153.496	2187.65	4.33333	115
exp3_larva_7	0.155997	0.191222	1.05295	0.222471	21.6327	7.11386	0.924812	2.81754	0.724388	Homogeneous	Agar	Sitter	27	5609	0.00481369	316.256	2937.26	2.07692	135
exp3_larva_8	0.185115	0.269617	0.913579	0.225034	16.6494	7.38565	0.927536	2.90585	0.862627	Homogeneous	Agar	Sitter	29	5612	0.0051675	249.512	2546.21	2.9	140
exp3_larva_9	0.221934	0.311286	1.00189	0.266725	20.7981	11.0019	-0.2	2.58764	0.934104	Homogeneous	Agar	Sitter	7	3347	0.00209143	272.071	1669.69	1.4	77
MEAN	0.222575	0.316542	0.958923	0.253664	18.5289	10.7361	0.119413	2.7867	0.947044				29.2	4462.83	0.00629252	243.634	2149.95	2.3602	110.767
STD	0.0557607	0.067371	0.130906	0.0411976	4.24247	4.93924	0.584934	0.796746	0.134947				28.484	1628.34	0.00509144	79.0887	853.911	1.19612	53.3115
N samples	29	29	29	29	28	28	28	29	29				30	30	29	30	30	29	30
ID	turning_rate	std_turning_rate	speed	std_speed	steps	std_steps	handedness	num_turns_min	std_num_turns_min	env	substrate	larva_type	frames_not_moving	recorded_frames	pause_proportion	dist_five_min	crawl_dist	pause_duration	total_turns
exp1_larva_0	0.312488	0.415653	0.714707	0.25607				2.30137	0.458853	Homogeneous	Sucrose	Sitter	5	298	0.0167785	103.99	103.99	1.66667	6
exp1_larva_1	0.318778	0.45388	0.585559	0.225138	13.7417	12.7039	0.2	1.74797	0.919053	Homogeneous	Sucrose	Sitter	102	2403	0.0424469	72.0175	673.256	1.78947	37
exp1_larva_2	0.245217	0.299157	0.622584	0.173228	16.2807	10.3071	0.485714	1.86497	0.828251	Homogeneous	Sucrose	Sitter	34	4440	0.00765766	173.169	1370.14	1.41667	72
exp1_larva_3	0.336372	0.469781	0.699835	0.265068	10.9144	11.8779	-0.395349	2.50274	1.31351	Homogeneous	Sucrose	Sitter	52	4167	0.012479	208.668	1439.12	1.44444	88
exp1_larva_4	0.286808	0.375562	0.658907	0.205437				2.38182	0.719619	Homogeneous	Sucrose	Sitter	2	337	0.00593472	110.037	110.037	2	8
exp1_larva_5	0.317416	0.455865	0.698136	0.246032	14.5406	10.467	0.387097	2.37286	1.1348	Homogeneous	Sucrose	Sitter	29	2994	0.00968604	204.434	1033.04	1.38095	64
exp1_larva_6	0.394075	0.568777	0.574054	0.305363	13.8169	7.87098	0.6	1.88778	1.02742	Homogeneous	Sucrose	Sitter	148	1643	0.0900791	103.349	429.139	1.64444	27
exp1_larva_7	0.340029	0.475989	0.641822	0.263292	12.602	6.08709	-0.0769231	2.48148	0.662539	Homogeneous	Sucrose	Sitter	35	1207	0.0289975	169.097	375.682	1.75	28
exp1_larva_8	0.377091	0.517107	0.53654	0.257685	12.3244	8.72948	-0.404255	1.92622	1.10234	Homogeneous	Sucrose	Sitter	146	2973	0.0491086	97.3637	758.58	1.87179	49
exp1_larva_9	0.232633	0.297225	0.684983	0.194347	12.3041	5.70009	-0.842857	2.78513	0.937248	Homogeneous	Sucrose	Sitter	53	5977	0.00886732	189.88	2028.05	1.65625	142
exp2_larva_0	0.290566	0.422881	0.667322	0.255546	15.5611	12.2921	0.372549	2.0872	1.08771	Homogeneous	Sucrose	Sitter	71	2908	0.0244154	173.517	945.696	1.39216	53
exp2_larva_1	0.228998	0.270298	0.638483	0.157229	27.2907	19.3186	-0.219512	1.21761	0.834746	Homogeneous	Sucrose	Sitter	23	3988	0.0057673	185.081	1264.9	1.53333	43
exp2_larva_2	0.194727	0.262759	0.826875	0.248323	24.7544	17.64	0.612903	1.50071	0.786763	Homogeneous	Sucrose	Sitter	31	2456	0.0126221	258.765	1001.42	1.63158	33
exp2_larva_3	0.269248	0.382288	0.636277	0.191788				1.22703	0.581075	Homogeneous	Sucrose	Sitter	2	302	0.00662252	95.1234	95.1518	1	5
exp2_larva_4	0.234318	0.304818	0.712468	0.198478	16.7877	9.0232	-0.80531	2.3	0.833267	Homogeneous	Sucrose	Sitter	48	5998	0.00800267	186.229	2119.38	2	115
exp2_larva_5	0.303014	0.422606	0.641957	0.205339				1.86437	0.795881	Homogeneous	Sucrose	Sitter	7	1223	0.00572363	188.313	389.682	1.4	19
exp2_larva_6	0.241551	0.34513	0.785721	0.24371	13.5583	6.28588	0.652174	3.17543	1.09687	Homogeneous	Sucrose	Sitter	28	1704	0.0164319	230.8	657.27	3.11111	48
exp2_larva_7	0.244046	0.355646	0.774289	0.226925	27.4286	39.4278	0.183673	1.56035	0.799548	Homogeneous	Sucrose	Sitter	37	3296	0.0112257	209.533	1669.34	2.17647	51
exp2_larva_8	0.287928	0.452649	0.748509	0.265704				1.58353	0.740616	Homogeneous	Sucrose	Sitter	7	955	0.00732984	216.998	354.433	1.16667	14
exp2_larva_9	0.28619	0.418927	0.717232	0.272547	17.7095	9.96969	-0.280899	1.95518	0.781508	Homogeneous	Sucrose	Sitter	199	5431	0.0366415	195.367	1875.05	2.18681	91
exp3_larva_0	0.262995	0.328872	0.620159	0.188501	15.4029	16.5746	-0.0612245	1.5222	1.02047	Homogeneous	Sucrose	Sitter	33	3747	0.00880705	155.772	1149.65	1.375	51
exp3_larva_1	0.358814	0.48387	0.592511	0.254029	14.834	8.54538	0.308642	1.78496	0.797381	Homogeneous	Sucrose	Sitter	154	4320	0.0356481	106.12	1229.36	2.16901	83
exp3_larva_2	0.429622	0.532532	0.56488	0.271121	13.6191	7.283	0.151515	1.92435	0.993243	Homogeneous	Sucrose	Sitter	161	4226	0.0380975	173.33	1147.98	1.78889	68
exp3_larva_3	0.263644	0.349098	0.688823	0.233341	15.7801	10.3136	-0.505155	2.18983	0.965359	Homogeneous	Sucrose	Sitter	56	5168	0.0108359	177.613	1758.5	2.07407	99
exp3_larva_4	0.327687	0.420804	0.599797	0.256853				1.90812	0.791083	Homogeneous	Sucrose	Sitter	48	1238	0.0387722	154.303	356.955	1.71429	20
exp3_larva_5	0.259777	0.35205	0.713209	0.227009	17.6263	8.37612	-0.230769	2.16269	0.749395	Homogeneous	Sucrose	Sitter	13	1521	0.00854701	196.881	537.171	1.08333	28
exp3_larva_6	0.228827	0.321813	0.848948	0.344015	11.6867	4.09666	0.265306	3.95984	1.19702	Homogeneous	Sucrose	Sitter	86	5931	0.0145001	133.894	2479.2	1.72	198
exp3_larva_7	0.207502	0.302512	0.874545	0.312067	23.2314	15.6157	-0.268293	1.77726	0.925846	Homogeneous	Sucrose	Sitter	63	2617	0.0240734	159.806	1115.45	1.8	43
exp3_larva_8	0.229701	0.29906	0.784267	0.267221	11.1383	3.88043	0.138298	3.79223	1.0656	Homogeneous	Sucrose	Sitter	103	5971	0.01725	245.5	2300.33	1.87273	190
exp3_larva_9	0.296568	0.393625	0.645322	0.23513	15.2695	8.73506	-0.606061	2.1223	0.907108	Homogeneous	Sucrose	Sitter	54	3647	0.0148067	169.562	1157.87	1.8	68
MEAN	0.286888	0.391708	0.683291	0.241551	16.1751	11.2967	-0.014114	2.12892	0.895137				61	3102.87	0.0206052	168.15	1064.19	1.72054	61.3667
STD	0.0567398	0.0816596	0.0855275	0.04125	4.7799	7.23169	0.44357	0.639826	0.187502				53.3931	1820.66	0.0182479	47.3874	675.23	0.407343	48.8527
N samples	30	30	30	30	24	24	24	30	30				30	30	30	30	30	30	30
ID	turning_rate	std_turning_rate	speed	std_speed	steps	std_steps	handedness	num_turns_min	std_num_turns_min	env	substrate	larva_type	frames_not_moving	recorded_frames	pause_proportion	dist_five_min	crawl_dist	pause_duration	total_turns
exp1_larva_0	0.638775	0.743554	0.297288	0.15164	6.53636	2.77922	0.301587	1.76915	0.928424	Homogeneous	Yeast	Sitter	972	4292	0.226468	49.2031	493.11	2.63415	65
exp1_larva_1	0.662995	0.766338	0.238826	0.116727	4.60977	2.57001	0.0625	1.32	1.09328	Homogeneous	Yeast	Sitter	2044	5998	0.34078	44.4616	474.886	3.62411	66
exp1_larva_2	0.518857	0.634182	0.432865	0.208167	6.65952	4.75501	0.02	2.59847	1.20465	Homogeneous	Yeast	Sitter	163	4126	0.0395056	70.7722	852.544	1.34711	102
exp1_larva_3	0.809493	0.944003	0.160237	0.0610396				0.369926	0.66639	Homogeneous	Yeast	Sitter	3607	5955	0.605709	27.0531	191.925	5.30441	18
exp1_larva_4	0.465843	0.571902	0.462535	0.196975	6.77542	4.1668	0.702703	3.29867	1.37256	Homogeneous	Yeast	Sitter	353	5419	0.0651412	93.7308	1168.51	2.16564	150
exp1_larva_5	0.753829	0.916971	0.186183	0.0981421	6.71984	3.48806	0.181818	0.466562	0.660617	Homogeneous	Yeast	Sitter	2896	5953	0.486477	36.7095	288.676	3.64736	24
exp1_larva_6	0.591457	0.707306	0.320187	0.163588	6.77542	4.13348	-0.254902	1.67049	0.905879	Homogeneous	Yeast	Sitter	692	3492	0.198167	37.9175	445.111	2.83607	53
exp1_larva_7	0.750487	0.958294	0.154295	0.058682				0.308272	0.611741	Homogeneous	Yeast	Sitter	4051	5955	0.680269	38.8651	150.465	6.52335	15
exp1_larva_8	0.621643	0.747104	0.250267	0.117251	7.5	5.22409	-0.037037	1.13271	0.793505	Homogeneous	Yeast	Sitter	1467	5981	0.245277	31.6498	566.03	2.95171	56
exp1_larva_9	0.444576	0.539746	0.515089	0.214574	6.99664	4.16628	0.411765	3.20412	1.09172	Homogeneous	Yeast	Sitter	397	4795	0.0827946	95.1487	1104.36	2.23034	155
exp2_larva_0	0.519747	0.661946	0.297387	0.17339	5.25	3.04475	-0.0612245	1.85405	1.74411	Homogeneous	Yeast	Sitter	775	3015	0.257048	16.5137	333.764	3.02734	51
exp2_larva_1	0.645395	0.701352	0.356911	0.153131				2.30248	1.0599	Homogeneous	Yeast	Sitter	32	840	0.0380952	104.267	144.012	1.77778	20
exp2_larva_2	0.564675	0.672591	0.339425	0.147264	6.64384	4.06453	-0.512195	2.33469	0.881477	Homogeneous	Yeast	Sitter	118	2230	0.0529148	76.2838	358.071	1.68571	43
exp2_larva_3	0.685856	0.791794	0.23528	0.130874	6.04669	4.86256	-0.0566038	1.03161	0.93904	Homogeneous	Yeast	Sitter	1606	5487	0.292692	69.9507	457.95	3.33888	55
exp2_larva_4	0.503755	0.604763	0.434407	0.187532	6.91859	5.2476	0.288889	2.81853	1.27891	Homogeneous	Yeast	Sitter	228	5673	0.0401904	79.6592	1181.35	2.13084	137
exp2_larva_5	0.541865	0.663416	0.354866	0.238274	5.7717	3.62696	-0.244444	2.19973	1.90278	Homogeneous	Yeast	Sitter	1261	5034	0.250497	75.6012	670.753	3.51253	92
exp2_larva_6	0.578813	0.701627	0.292048	0.158423	4.88141	3.73393	-0.0666667	2.02666	1.19923	Homogeneous	Yeast	Sitter	553	4305	0.128455	70.5641	547.931	2.15175	77
exp2_larva_7	0.669375	0.822813	0.235523	0.118462				1.83669	1.12435	Homogeneous	Yeast	Sitter	230	793	0.290038	51.3677	66.4177	3.06667	11
exp2_larva_8	0.485509	0.609074	0.441249	0.226033	5.82401	4.48161	0.0204082	2.89833	1.80922	Homogeneous	Yeast	Sitter	708	5804	0.121985	118.8	1124.39	2.85484	149
exp2_larva_9	0.507025	0.629981	0.428226	0.221366	5.27524	3.6323	0.146497	3.05105	1.92396	Homogeneous	Yeast	Sitter	657	5769	0.113885	158.428	1093.25	2.869	159
exp3_larva_0	0.38807	0.509753	0.537005	0.259963				3.16	0.366606	Homogeneous	Yeast	Sitter	7	177	0.039548	44.8399	44.9504	1.4	8
exp3_larva_1	0.571407	0.674135	0.259034	0.116079	5.71535	3.86344	0.173913	1.77303	0.917822	Homogeneous	Yeast	Sitter	421	3156	0.133397	53.4979	353.068	2.12626	48
exp3_larva_2	0.442293	0.544791	0.374103	0.235686	10.0315	8.87636	0.027027	1.25276	1.0301	Homogeneous	Yeast	Sitter	435	2926	0.148667	68.5939	466.025	1.93333	39
exp3_larva_3	0.435315	0.550236	0.301755	0.129545	8.19394	3.90584	-0.4	1.51649	0.904704	Homogeneous	Yeast	Sitter	230	2196	0.104736	60.5495	296.968	1.72932	32
exp3_larva_4	0.722372	0.83678	0.184719	0.0818392	5.64951	3.24764	0.16129	0.66	0.849745	Homogeneous	Yeast	Sitter	2911	5998	0.485328	46.2333	288.796	4.12323	33
exp3_larva_5	0.408654	0.52415	0.359447	0.146076	7.30796	4.62754	-0.605263	2.24935	1.09434	Homogeneous	Yeast	Sitter	292	3821	0.0764198	87.4855	633.755	1.94667	78
exp3_larva_6	0.575361	0.722963	0.244099	0.12861	7.25108	5.78859	0.631579	0.953301	0.949782	Homogeneous	Yeast	Sitter	1366	4828	0.282933	13.5744	427.308	2.28811	40
exp3_larva_7	0.699867	0.916582	0.144514	0.0449311				0.137949	0.355584	Homogeneous	Yeast	Sitter	4329	5970	0.725126	37.1364	124.265	6.20201	9
exp3_larva_8	0.554391	0.716989	0.233876	0.122463	6.67083	5.46991	0.111111	0.78286	0.837692	Homogeneous	Yeast	Sitter	1822	4958	0.367487	56.8863	370.358	3.11986	38
exp3_larva_9	0.628983	0.927184	0.147594	0.0517399				0.22	0.514393	Homogeneous	Yeast	Sitter	3610	5998	0.601867	39.3559	185.947	3.47115	11
MEAN	0.579556	0.710411	0.307308	0.148615	6.52194	4.33724	0.0435979	1.7066	1.03375				1274.43	4364.8	0.25073	61.8367	496.831	2.93398	61.1333
STD	0.110173	0.132185	0.110614	0.0589145	1.16838	1.30111	0.319637	0.969008	0.40507				1302.65	1747.44	0.203897	31.4553	342.563	1.27504	47.1364
N samples	30	30	30	30	23	23	23	30	30				30	30	30	30	30	30	30

## Sheet: Homogeneous - Rover
Rover
ID	turning_rate	std_turning_rate	speed	std_speed	steps	std_steps	handedness	num_turns_min	std_num_turns_min	env	substrate	larva_type	frames_not_moving	recorded_frames	pause_proportion	dist_five_min	crawl_dist	pause_duration	total_turns
exp1_larva_0	0.230662	0.29932	0.968265	0.228372	17.5089	7.99272	-0.941176	3.03504	0.86566	Homogeneous	Agar	Rover	44	5283	0.0083286	276.656	2533.18	2.75	138
exp1_larva_1	0.309122	0.391387	0.838086	0.254276	14.6996	5.56186	0.717949	3.15558	0.80548	Homogeneous	Agar	Rover	28	5971	0.00468933	226.339	2488.83	2.33333	158
exp1_larva_2	0.294484	0.387867	0.890096	0.245888	15.6831	6.13618	-0.880795	3.24393	0.741516	Homogeneous	Agar	Rover	39	5310	0.00734463	255.915	2341.04	3.25	153
exp1_larva_3	0.688502	0.669875	0.442079	0.189291	14.4124	12.5882	0.285714	1.21565	0.859853	Homogeneous	Agar	Rover	145	5197	0.0279007	130.182	1116.21	1.36792	58
exp1_larva_4	0.400608	0.517877	0.668023	0.272316	14.7505	7.80661	-0.686957	2.32964	0.959942	Homogeneous	Agar	Rover	127	5986	0.0212162	153.648	1956.91	1.71622	117
exp1_larva_5	0.366643	0.477704	0.840379	0.304356	22.9197	13.3053	-0.347826	2.04242	0.932461	Homogeneous	Agar	Rover	58	5441	0.0106598	281.616	2259.19	2.63636	94
exp1_larva_6	0.261326	0.325288	0.976659	0.261748	20.7609	9.31369	0.952756	2.58384	0.863143	Homogeneous	Agar	Rover	57	5984	0.0095254	292.043	2893.5	2.47826	129
exp1_larva_7	0.347979	0.417937	0.728154	0.24229	15.4743	6.63231	0.966667	2.47373	0.888302	Homogeneous	Agar	Rover	62	5758	0.0107676	201.122	2072.48	2.48	122
exp1_larva_8	0.278483	0.420797	0.857758	0.266158	16.7281	8.70389	0.775701	2.74015	0.888691	Homogeneous	Agar	Rover	24	4580	0.00524017	237.84	1951.14	1.84615	109
exp1_larva_9	0.319602	0.385464	0.920002	0.255968	21.5902	10.1503	-0.677419	2.42238	0.825585	Homogeneous	Agar	Rover	9	4544	0.00198063	60.0851	2082.98	1	95
exp2_larva_0	0.337222	0.393811	0.982119	0.337633	15.5189	8.61993	-0.257143	3.30005	1.33545	Homogeneous	Agar	Rover	17	4902	0.00346797	280.462	2395.44	1.88889	142
exp2_larva_1	0.528124	0.523054	0.712574	0.262915	11.4483	11.1669	-0.407407	2.38829	1.29326	Homogeneous	Agar	Rover	2	2478	0.000807103	214.074	880.057	1	56
exp2_larva_2	0.328921	0.409567	0.793169	0.261525	16.5718	13.0607	-0.408163	2.23948	1.05051	Homogeneous	Agar	Rover	33	5119	0.00644657	200.118	2014.85	1.73684	100
exp2_larva_3	0.410831	0.466156	0.728739	0.253459	11.4735	7.22571	0.428571	3.02299	0.879702	Homogeneous	Agar	Rover	24	2776	0.00864553	188.889	1001.47	1.2	72
exp2_larva_4	0.421584	0.531123	0.723089	0.257951	11.9504	9.34292	-0.0410959	2.7827	1.2187	Homogeneous	Agar	Rover	27	3048	0.00885827	205.91	1088.67	3	75
exp2_larva_5	0.306812	0.379103	0.908022	0.271785	16.3248	15.6858	0.431818	2.50104	1.19084	Homogeneous	Agar	Rover	64	4012	0.0159521	270.964	1789.29	10.6667	90
exp2_larva_6	0.33389	0.385004	0.876574	0.243113	14.032	6.30713	0.924812	3.19528	0.796185	Homogeneous	Agar	Rover	12	4860	0.00246914	238.25	2122.2	3	135
exp2_larva_7	0.378782	0.415528	0.803238	0.3093	14.279	12.1825	0.454545	2.67814	1.66849	Homogeneous	Agar	Rover	16	1465	0.0109215	240.001	580.388	1.77778	35
exp2_larva_8	0.389973	0.441673	0.650322	0.19909	14.6421	6.70245	0.885714	2.30866	0.677642	Homogeneous	Agar	Rover	3	1785	0.00168067	154.224	578.476	1	37
exp2_larva_9	0.40536	0.504215	0.719939	0.27432	24.1904	16.812	0.548387	1.42688	0.834064	Homogeneous	Agar	Rover	31	2426	0.0127782	197.803	860.926	1.40909	33
exp3_larva_0	0.271312	0.343625	0.931539	0.274073	22.6385	15.5164	0	1.85871	0.939957	Homogeneous	Agar	Rover	73	3604	0.0202553	269.911	1642.44	2.60714	64
exp3_larva_1	0.255681	0.351195	0.964433	0.250578			-0.181818	2.12189	0.88524	Homogeneous	Agar	Rover	0	1037	0	288.517	496.683		24
exp3_larva_2	0.38393	0.443703	0.657712	0.202948	14.1006	7.67494	0.707317	2.35926	0.911849	Homogeneous	Agar	Rover	51	3988	0.0127884	190.68	1293.2	2.68421	84
exp3_larva_3	0.201785	0.272455	1.05533	0.235685	22.2196	12.7289	-0.560976	2.39863	0.902716	Homogeneous	Agar	Rover	0	2036	0	311.206	1072.75		43
exp3_larva_4	0.332101	0.390675	0.917293	0.276068	15.619	6.99187	-0.393939	3.03773	0.920493	Homogeneous	Agar	Rover	3	3648	0.000822368	275.829	1668.13	1	101
exp3_larva_5	0.309625	0.428545	0.965628	0.319287	8.78519	7.00945	0.771429	4.94	2.63744	Homogeneous	Agar	Rover	60	5998	0.0100033	228.322	2866.71	2.30769	247
exp3_larva_6	0.330475	0.402927	0.909426	0.285057	14.3298	9.80074	-0.5	3.21171	1.41482	Homogeneous	Agar	Rover	17	3480	0.00488506	329.796	1573.82	2.125	94
exp3_larva_7	0.356605	0.462505	0.866286	0.324552	9.42486	9.77456	0.556818	3.64416	2.44785	Homogeneous	Agar	Rover	77	5891	0.0130708	258.748	2516.38	2.40625	178
exp3_larva_8	0.308248	0.383869	0.956534	0.265975	19.7651	11.5389	-0.68	2.36191	0.822939	Homogeneous	Agar	Rover	2	3587	0.000557569	261.101	1712.23	1	77
exp3_larva_9	0.282499	0.405895	0.929855	0.326228	16.6787	9.16431	-0.225806	2.45486	0.786983	Homogeneous	Agar	Rover	8	1176	0.00680272	275.388	540.765	1.6	33
MEAN	0.345706	0.420938	0.839378	0.265073	16.1559	9.84474	0.0739226	2.64916	1.07486				37.1	4045.67	0.00829552	233.188	1679.68	2.29528	96.4333
STD	0.0919945	0.0778395	0.133847	0.0361638	3.97896	3.08862	0.620896	0.694868	0.456398				35.8131	1581.52	0.00677306	58.2184	722.175	1.78124	50.2399
N samples	30	30	30	30	29	29	30	30	30				30	30	30	30	30	28	30
ID	turning_rate	std_turning_rate	speed	std_speed	steps	std_steps	handedness	num_turns_min	std_num_turns_min	env	substrate	larva_type	frames_not_moving	recorded_frames	pause_proportion	dist_five_min	crawl_dist	pause_duration	total_turns
exp1_larva_0	0.384859	0.492247	0.642931	0.245101	13.5965	5.23185	-0.168	2.51274	0.863828	Homogeneous	Sucrose	Rover	41	5889	0.00696213	200.852	1878.53	1.51852	127
exp1_larva_1	0.407939	0.512126	0.59465	0.266947	12.2602	8.0881	0.115385	2.05765	0.804942	Homogeneous	Sucrose	Rover	23	2705	0.00850277	196.633	794.674	1.04545	54
exp1_larva_2	0.432221	0.534274	0.498259	0.187252	12.5901	12.5004	-0.153846	1.53637	0.856185	Homogeneous	Sucrose	Rover	45	3947	0.0114011	153.176	971.99	1.07143	54
exp1_larva_3	0.276901	0.419507	0.879364	0.285544				1.88963	0.795804	Homogeneous	Sucrose	Rover	1	715	0.0013986	260.734	313.508	1	13
exp1_larva_4	0.360538	0.479404	0.61477	0.238153	14.0733	11.5105	-0.125	1.6482	0.759434	Homogeneous	Sucrose	Rover	25	3873	0.00645494	193.79	1181.12	1	66
exp1_larva_5	0.343926	0.442853	0.706622	0.249408	12.8677	5.23719	0.0769231	2.88053	0.817884	Homogeneous	Sucrose	Rover	45	5818	0.00773462	162.428	2039.88	1.25	145
exp1_larva_6	0.376853	0.490625	0.619992	0.243719	14.551	8.70423	0.631068	2.04365	0.951774	Homogeneous	Sucrose	Rover	54	5941	0.00908938	226.452	1824.16	1.25581	105
exp1_larva_7	0.428399	0.53052	0.622743	0.253837	13.1636	6.99506	-0.653061	2.44837	0.824966	Homogeneous	Sucrose	Rover	20	4583	0.00436395	243.543	1419.26	1.17647	100
exp1_larva_8	0.359438	0.506556	0.681097	0.257237				2.82984	0.604139	Homogeneous	Sucrose	Rover	5	546	0.00915751	183.896	183.946	1	13
exp1_larva_9	0.404147	0.542072	0.553306	0.215246	16.0895	12.4229	0.461538	1.61306	0.972244	Homogeneous	Sucrose	Rover	33	1972	0.0167343	179.327	536.078	1.43478	28
exp2_larva_0	0.47014	0.547605	0.543668	0.225668	9.63474	4.99181	0.466667	2.49599	0.919481	Homogeneous	Sucrose	Rover	23	2029	0.0113356	182.69	544.168	1.04545	47
exp2_larva_1	0.372212	0.488207	0.585027	0.238372	11.0255	5.70897	-0.820513	2.49582	1.1311	Homogeneous	Sucrose	Rover	51	3788	0.0134636	167.117	1091.9	1.30769	80
exp2_larva_2	0.357325	0.503724	0.706331	0.26035	15.1094	10.0981	0.342466	2.25245	0.870842	Homogeneous	Sucrose	Rover	23	3801	0.00605104	187.391	1333.05	1.35294	75
exp2_larva_3	0.350837	0.472956	0.762285	0.298702	11.413	8.12764	0.27027	3.07601	1.14325	Homogeneous	Sucrose	Rover	25	2758	0.00906454	204.002	1038.84	1.31579	76
exp2_larva_4	0.416957	0.50688	0.747773	0.314914	14.0518	10.4809	0.659574	2.0945	1.04239	Homogeneous	Sucrose	Rover	82	2471	0.0331849	138.484	892.097	2	49
exp2_larva_5	0.385389	0.497176	0.713489	0.287604	10.5631	4.44467	-0.32	3.57463	0.891169	Homogeneous	Sucrose	Rover	5	1725	0.00289855	193.905	613.284	1	52
exp2_larva_6	0.346143	0.418018	0.678242	0.239037	11.8539	4.09431	0.714286	2.98788	0.966276	Homogeneous	Sucrose	Rover	34	3327	0.0102194	194.818	1115.82	1.88889	86
exp2_larva_7	0.368147	0.475088	0.730042	0.253284	11.4484	5.40925	0.662921	3.37467	1.06417	Homogeneous	Sucrose	Rover	19	3181	0.00597296	203.606	1153.88	2.71429	91
exp2_larva_8	0.383899	0.503682	0.692886	0.259221	13.0889	7.5906	0.714286	2.41121	0.848663	Homogeneous	Sucrose	Rover	51	3018	0.0168986	181.223	1024.25	2.21739	72
exp2_larva_9	0.439667	0.532215	0.609722	0.255009	10.9637	10.6567	0.0212766	2.35198	1.25405	Homogeneous	Sucrose	Rover	41	2491	0.0164593	160.934	745.932	1.64	49
exp3_larva_0	0.489107	0.580625	0.587468	0.232968	12.8865	7.98664	0.2	2.06478	0.904927	Homogeneous	Sucrose	Rover	20	2761	0.00724375	184.805	804.448	1.11111	52
exp3_larva_1	0.348517	0.497918	0.737661	0.296891	12.7988	7.67829	0.52	2.66667	0.984401	Homogeneous	Sucrose	Rover	49	1140	0.0429825	201.541	403.783	3.26667	27
exp3_larva_2	0.427916	0.554238	0.606683	0.273516	12.1095	8.4046	0.573333	2.28733	1.1399	Homogeneous	Sucrose	Rover	49	3579	0.013691	183.128	1068.07	1.25641	77
exp3_larva_3	0.44406	0.545954	0.739277	0.304549	11.8154	7.68207	-0.190476	2.73241	0.854227	Homogeneous	Sucrose	Rover	10	1689	0.00592066	191.259	619.248	1	44
exp3_larva_4	0.445565	0.530445	0.584848	0.272969	10.3127	7.58563	-0.517241	2.27181	1.10259	Homogeneous	Sucrose	Rover	141	3065	0.0460033	126.15	854.289	1.95833	60
exp3_larva_5	0.308125	0.403388	0.743994	0.272574	14.5371	8.45231	0.521739	2.51621	0.830277	Homogeneous	Sucrose	Rover	84	4388	0.0191431	251.325	1599.69	4.94118	94
exp3_larva_6	0.379235	0.502463	0.808505	0.327354	14.9164	6.20553	0.428571	3.00685	0.669252	Homogeneous	Sucrose	Rover	4	1073	0.00372787	195.709	430.173	1	30
exp3_larva_7	0.350589	0.481081	0.702289	0.272777	14.375	8.95822	0.282051	2.54442	1.34579	Homogeneous	Sucrose	Rover	10	1862	0.00537057	212.342	649.052	1	41
exp3_larva_8	0.427991	0.558024	0.733829	0.278254	15.5092	9.65318	0.655914	2.31329	0.972866	Homogeneous	Sucrose	Rover	56	4662	0.012012	169.672	1687.32	2.15385	95
exp3_larva_9	0.32901	0.451103	0.868305	0.316546	16.0016	17.5716	-0.0169492	2.32462	1.19171	Homogeneous	Sucrose	Rover	24	2995	0.00801336	240.859	1289.55	1.6	61
MEAN	0.387202	0.500032	0.676535	0.2641	12.986	8.30255	0.191185	2.44345	0.945951				36.4333	3059.73	0.0123819	192.393	1003.4	1.58408	65.4333
STD	0.0484159	0.0431208	0.0922253	0.0315471	1.76412	2.93334	0.434146	0.484814	0.169778				29.0026	1452.97	0.0106862	30.8657	479.094	0.844652	31.3387
N samples	30	30	30	30	28	28	28	30	30				30	30	30	30	30	30	30
ID	turning_rate	std_turning_rate	speed	std_speed	steps	std_steps	handedness	num_turns_min	std_num_turns_min	env	substrate	larva_type	frames_not_moving	recorded_frames	pause_proportion	dist_five_min	crawl_dist	pause_duration	total_turns
exp1_larva_0	0.37931	0.502788	0.501721	0.209263	7.30796	5.39065	-0.0947368	2.94256	1.23376	Homogeneous	Yeast	Rover	80	3358	0.0238237	47.2219	819.873	1.17647	97
exp1_larva_1	0.467031	0.605471	0.335149	0.185877	7.27682	5.77007	-0.225806	1.66174	1.34043	Homogeneous	Yeast	Rover	1078	4562	0.2363	27.4147	584.558	3.0452	64
exp1_larva_2	0.600333	0.749603	0.259777	0.15228	5.17959	3.8588	0.454545	1.11054	1.46586	Homogeneous	Yeast	Rover	1969	5808	0.339015	34.6054	505.308	2.78107	57
exp1_larva_3	0.525452	0.650791	0.343855	0.186385	5.10195	3.01595	0.222222	2.5539	1.5621	Homogeneous	Yeast	Rover	676	4162	0.162422	34.8201	599.343	2.22368	92
exp1_larva_4	0.653819	0.785179	0.201957	0.0953349	5.35023	3.59511	-0.609756	0.911472	0.935576	Homogeneous	Yeast	Rover	2496	5803	0.430122	12.3038	337.561	3.8818	43
exp1_larva_5	0.631329	0.780094	0.213416	0.109115	5.00312	3.88388	0.0666667	0.715637	0.951601	Homogeneous	Yeast	Rover	2663	5104	0.521748	19.4018	263.908	5.22157	32
exp1_larva_6	0.585119	0.908665	0.144344	0.0698852				0.18	0.455698	Homogeneous	Yeast	Rover	3945	5970	0.660804	30.4321	154.405	4.26948	9
exp1_larva_7	0.428107	0.54573	0.365792	0.164742	6.64267	4.19876	-0.0185185	2.29559	0.967897	Homogeneous	Yeast	Rover	509	5460	0.0932234	45.7156	906.007	2.06911	110
exp1_larva_8	0.581603	0.759326	0.232034	0.134002	6.09559	4.51315	-0.172414	0.576884	0.847998	Homogeneous	Yeast	Rover	3356	5958	0.563276	17.2433	305.766	5.51974	31
exp1_larva_9	0.450035	0.56804	0.340819	0.15034	6.78002	3.87574	0.656566	2.08197	1.10304	Homogeneous	Yeast	Rover	663	5385	0.12312	30.3791	805.682	2.22483	101
exp2_larva_0	0.354406	0.481012	0.58929	0.238239	8.08258	3.62819	0.263158	3.55732	0.735714	Homogeneous	Yeast	Rover	22	1312	0.0167683	164.554	379.874	1.46667	40
exp2_larva_1	0.345696	0.498359	0.553401	0.272237	7.57768	4.29668	0.207547	3.1884	2.0143	Homogeneous	Yeast	Rover	364	2065	0.176271	180.266	471.194	3.5	55
exp2_larva_2	0.310879	0.367164	0.527501	0.171786	6.25125	3.35944	0.894737	4.19086	1.31435	Homogeneous	Yeast	Rover	141	4701	0.0299936	131.823	1198.98	2.9375	173
exp2_larva_3	0.575868	0.661592	0.33736	0.163275				2.40314	0.824869	Homogeneous	Yeast	Rover	61	771	0.079118	74.4685	119.089	1.45238	17
exp2_larva_4	0.320025	0.421517	0.549274	0.219247	7.23861	6.43893	0.0909091	3.09358	0.833064	Homogeneous	Yeast	Rover	16	825	0.0193939	149.094	221.254	1.06667	24
exp2_larva_5	0.295634	0.372168	0.590139	0.223412	7.65903	2.69206	-0.0967742	3.78503	0.831163	Homogeneous	Yeast	Rover	40	874	0.0457666	152.234	245.336	2.5	33
exp2_larva_6	0.774866	0.847475	0.194965	0.0891516	3.10232	2.30825	0.348837	0.9	1.09621	Homogeneous	Yeast	Rover	2528	5998	0.421474	49.4706	342.848	3.63741	45
exp2_larva_7	0.385272	0.499594	0.482007	0.190619	7.01783	6.4118	0.310345	2.97031	1.23877	Homogeneous	Yeast	Rover	27	1175	0.0229787	125.961	276.378	1.125	31
exp2_larva_8	0.363821	0.475098	0.554839	0.248639				3.02493	1.16055	Homogeneous	Yeast	Rover	25	799	0.0312891	153.311	214.579	1.31579	21
exp2_larva_9	0.338362	0.433632	0.517883	0.197845	7.81425	5.09624	0.208333	3.49938	1.09553	Homogeneous	Yeast	Rover	60	3431	0.0174876	139.152	868.334	1.36364	98
exp3_larva_0	0.819357	0.843699	0.229964	0.131171	6.93777	4.17653	0.419355	0.66	0.900407	Homogeneous	Yeast	Rover	3150	5998	0.525175	51.1088	331.078	6.2749	33
exp3_larva_1	0.641687	0.742763	0.340033	0.219557	6.04023	3.73356	-0.189873	1.64885	1.35972	Homogeneous	Yeast	Rover	1935	5894	0.3283	64.5869	672.97	4.42792	81
exp3_larva_2	0.752952	0.842172	0.228711	0.130801	3.85073	2.55163	-0.45	0.84	1.26137	Homogeneous	Yeast	Rover	3382	5998	0.563855	17.0005	302.937	6.69703	42
exp3_larva_3	0.663643	0.719275	0.326248	0.154397	7.60345	4.6996	-0.235955	1.79631	1.00963	Homogeneous	Yeast	Rover	659	5968	0.110422	25.9299	868.242	1.9269	91
exp3_larva_4	0.644243	0.75281	0.353877	0.215805	6.84311	3.66372	-0.522727	1.84914	1.3773	Homogeneous	Yeast	Rover	1535	5892	0.260523	94.3944	770.716	3.4417	90
exp3_larva_5										Homogeneous	Yeast	Rover
exp3_larva_6	0.500226	0.650794	0.370287	0.226685	5.9595	5.06273	-0.185185	1.88457	1.44132	Homogeneous	Yeast	Rover	683	3435	0.198836	43.5651	511.527	2.37153	56
exp3_larva_7	0.521234	0.657189	0.329357	0.194818	7.39997	4.48774	0.454545	1.41401	1.11615	Homogeneous	Yeast	Rover	1496	5482	0.272893	54.5634	659.304	3.08454	68
exp3_larva_8	0.569252	0.739981	0.297257	0.206644	5.48293	3.29314	0.0740741	1.08226	1.48114	Homogeneous	Yeast	Rover	2907	5932	0.490054	65.7777	454.088	5.00344	56
exp3_larva_9	0.558651	0.742829	0.321313	0.217105	5.06216	4.32817	-0.0793651	1.3	1.50222	Homogeneous	Yeast	Rover	2780	5998	0.463488	23.1052	521.162	5.24528	65
MEAN	0.518559	0.641545	0.36664	0.17823	6.33313	4.16656	0.0688742	2.00408	1.15372				1353.31	4279.93	0.249239	71.0312	507.321	3.14659	60.5172
STD	0.148233	0.15566	0.13283	0.0503615	1.26764	1.073	0.358773	1.10221	0.315297				1289.65	1995.81	0.207214	53.2215	269.454	1.6274	35.6978
N samples	29	29	29	29	26	26	26	29	29				29	29	29	29	29	29	29

## Sheet: Homogeneous - Anosmic
Anosmic
ID	turning_rate	std_turning_rate	speed	std_speed	steps	std_steps	handedness	num_turns_min	std_num_turns_min	env	substrate	larva_type	frames_not_moving	recorded_frames	pause_proportion	dist_five_min	crawl_dist	pause_duration	total_turns
exp1_larva_0	0.268278	0.378063	1.23149	0.341011	14.7585	11.3241	0.439024	4.2235	1.17385	Homogeneous	Agar	Anosmic	1	2375	0.000421053	313.026	1458.7	1	84
exp1_larva_1	0.276922	0.416639	1.17858	0.345102	15.5829	9.49425	-0.253012	3.78431	1.20151	Homogeneous	Agar	Anosmic	48	5107	0.00939886	320.968	2974.36	2.82353	168
exp1_larva_2	0.412619	0.507269	0.909603	0.438741	14.3715	12.5842	-0.212121	2.41814	1.78257	Homogeneous	Agar	Anosmic	799	4880	0.16373	260.679	1854.71	7.13393	101
exp1_larva_3	0.35529	0.437082	1.01215	0.27898	12.0513	4.60674	0.86383	4.74	1.06649	Homogeneous	Agar	Anosmic	35	5998	0.00583528	245.693	3017.31	2.33333	237
exp1_larva_4	0.246609	0.327773	1.31585	0.335762	18.2725	12.281	0.301587	3.26986	1.09595	Homogeneous	Agar	Anosmic	0	1861	0	328.489	1217.16		65
exp1_larva_5	0.324771	0.435316	1.1063	0.343686	14.6682	9.91629	0.354839	3.70912	0.963042	Homogeneous	Agar	Anosmic	1	981	0.00101937	341.1	540.997	1	33
exp1_larva_6	0.400725	0.438836	0.923055	0.373314				2.87526	0.77982	Homogeneous	Agar	Anosmic	3	716	0.00418994	232.265	327.699	1.5	20
exp1_larva_7	0.267964	0.307949	1.12672	0.266072	21.5466	12.5908	-0.594203	2.78955	0.989273	Homogeneous	Agar	Anosmic	19	2835	0.00670194	229.574	1581.97	2.375	71
exp1_larva_8	0.336034	0.474074	1.09625	0.324864	13.25	5.44788	0.771429	4.76562	1.22725	Homogeneous	Agar	Anosmic	12	939	0.0127796	331.594	507.037	2	37
exp1_larva_9	0.36672	0.437967	1.01789	0.283528				4.20519	0.805565	Homogeneous	Agar	Anosmic	0	541	0	274.829	274.829		18
exp2_larva_0	0.294404	0.403447	1.27429	0.386102	13.5721	6.44916	-0.764706	5.03816	1.12794	Homogeneous	Agar	Anosmic	39	5659	0.00689168	371.769	3578.44	1.69565	240
exp2_larva_1	0.240043	0.351828	1.18943	0.353622	22.1254	13.5319	0.454545	2.53531	0.820651	Homogeneous	Agar	Anosmic	34	2685	0.0126629	323.219	1571.93	2.42857	68
exp2_larva_2	0.287935	0.39577	1.20987	0.355594	15.8336	7.44023	0.73399	4.26163	1.08489	Homogeneous	Agar	Anosmic	54	5613	0.00962052	330.272	3358.65	2.34783	205
exp2_larva_3	0.293195	0.427018	1.17619	0.371602	17.4396	10.1301	0.384615	3.76522	1.45362	Homogeneous	Agar	Anosmic	27	3780	0.00714286	318.016	2200.13	2.7	119
exp2_larva_4	0.249937	0.368521	1.16897	0.333524	14.507	21.6247	-0.172414	2.77246	1.59085	Homogeneous	Agar	Anosmic	18	2330	0.00772532	248.871	1350.61	2	60
exp2_larva_5	0.349437	0.480455	1.02773	0.386911	16.0413	12.9588	-0.319444	3.00882	1.61524	Homogeneous	Agar	Anosmic	49	5801	0.00844682	370.936	2953.31	2.33333	146
exp2_larva_6	0.254323	0.354688	1.24545	0.351878	17.4575	11.5732	-0.140496	3.71545	1.34952	Homogeneous	Agar	Anosmic	9	3838	0.00234497	300.722	2376.31	3	123
exp2_larva_7	0.239517	0.384231	1.25768	0.362479	20.1483	14.6196	-0.254237	3.2326	2.01305	Homogeneous	Agar	Anosmic	4	2009	0.00199104	281.191	1254.58	1	61
exp2_larva_8	0.278155	0.385442	1.15941	0.365587	14.5629	22.842	-0.410405	3.71692	1.33426	Homogeneous	Agar	Anosmic	51	5034	0.0101311	171.136	3298.84	4.63636	175
exp3_larva_0	0.302803	0.391771	1.09379	0.320978	15.0354	8.22381	0.39759	4.18456	1.28443	Homogeneous	Agar	Anosmic	21	2440	0.00860656	266.172	1319.7	4.2	85
exp3_larva_1	0.246214	0.367122	1.24084	0.341449	21.1302	17.049	-0.130435	2.28485	1.01821	Homogeneous	Agar	Anosmic	0	1810	0	332.293	1120.7		48
exp3_larva_2	0.340054	0.465073	1.01789	0.370077	13.4629	6.79704	0.714286	3.85311	1.07269	Homogeneous	Agar	Anosmic	16	1971	0.00811771	298.991	993.968	8	65
exp3_larva_3	0.275336	0.39944	1.02207	0.313755	17.9093	12.0532	-0.226891	2.89209	1.0394	Homogeneous	Agar	Anosmic	102	4940	0.0206478	275.955	2471.12	3	121
exp3_larva_4	0.272285	0.407593	1.20769	0.404419	16.1565	13.364	-0.219512	2.81705	1.34017	Homogeneous	Agar	Anosmic	19	1167	0.0162811	199.311	688.44	3.16667	43
exp3_larva_5	0.40789	0.519469	0.887877	0.309202				4.72485	0.928528	Homogeneous	Agar	Anosmic	2	455	0.0043956	200.66	200.688	2	19
exp3_larva_6	0.407165	0.453597	0.757584	0.307093	13.3756	9.95851	0.0782609	2.71854	1.3722	Homogeneous	Agar	Anosmic	35	4988	0.00701684	186.855	1873.64	3.18182	117
exp3_larva_7	0.279007	0.373092	0.993594	0.308681	21.5987	18.9134	-0.209302	2.11411	0.997389	Homogeneous	Agar	Anosmic	35	2356	0.0148557	187.32	1150.14	2.91667	45
exp3_larva_8	0.343375	0.465413	1.02111	0.385802	15.2973	10.2145	0.362637	3.28927	1.48729	Homogeneous	Agar	Anosmic	34	2953	0.0115137	260.666	1485.86	1.88889	93
exp3_larva_9	0.349464	0.503669	0.969399	0.358693	13.4629	9.06447	0.292135	3.6	1.33866	Homogeneous	Agar	Anosmic	61	5998	0.0101701	251.446	2877.48	1.84848	180
MEAN	0.309189	0.415814	1.09789	0.345466	16.293	11.7328	0.086215	3.49329	1.21911				52.6897	3174.48	0.0128496	277.725	1719.98	2.78885	98.1724
STD	0.0538137	0.0529008	0.132565	0.0377478	2.87333	4.45331	0.43563	0.793862	0.287248				142.934	1818.01	0.0289588	55.1202	989.918	1.62646	62.9094
N samples	29	29	29	29	26	26	26	29	29				29	29	29	29	29	26	29
ID	turning_rate	std_turning_rate	speed	std_speed	steps	std_steps	handedness	num_turns_min	std_num_turns_min	env	substrate	larva_type	frames_not_moving	recorded_frames	pause_proportion	dist_five_min	crawl_dist	pause_duration	total_turns
exp1_larva_0	0.24387	0.329976	0.879625	0.249488	20.9235	11.4042	0.25	2.30504	0.765565	Homogeneous	Sucrose	Anosmic	22	1979	0.0111167	212.206	858.562	1.57143	42
exp1_larva_1	0.303561	0.361399	0.655396	0.252948	12.9339	11.7041	0.179487	2.11937	0.89721	Homogeneous	Sucrose	Anosmic	45	2128	0.0211466	143.642	680.839	1.55172	41
exp1_larva_2	0.350789	0.407792	0.598686	0.225092	13.9952	9.9365	-0.369863	2.01751	1.02397	Homogeneous	Sucrose	Anosmic	87	4407	0.0197413	166.49	1292.21	1.8125	75
exp1_larva_3	0.389106	0.423072	0.594794	0.233074	11.0489	8.67536	0.133333	2.48463	1.02067	Homogeneous	Sucrose	Anosmic	25	1516	0.0164908	189.182	443.17	3.57143	32
exp1_larva_4	0.286301	0.332737	0.776897	0.216397	13.0222	6.00078	0.732484	3.15359	0.920135	Homogeneous	Sucrose	Anosmic	15	5983	0.0025071	185.224	2317.18	1.15385	159
exp1_larva_5	0.295757	0.356914	0.646401	0.213411	13.5006	5.76411	0.860465	2.4239	0.699887	Homogeneous	Sucrose	Anosmic	37	4206	0.00879696	195.898	1346.61	1.37037	88
exp1_larva_6	0.335466	0.40551	0.569047	0.181754	13.4494	10.2925	0.405405	1.87068	0.990221	Homogeneous	Sucrose	Anosmic	26	2289	0.0113587	173.952	642.844	1.36842	39
exp1_larva_7	0.327286	0.412353	0.662029	0.234022	10.1067	5.54927	0.461538	3.12719	1.22079	Homogeneous	Sucrose	Anosmic	20	2004	0.00998004	166.54	656.183	1.42857	54
exp1_larva_8	0.505241	0.549215	0.5288	0.20097	6.80869	2.55051	-0.142857	3.39127	1.00658	Homogeneous	Sucrose	Anosmic	27	1564	0.0172634	144.454	405.994	1.17391	44
exp1_larva_9	0.297677	0.411994	0.872962	0.302869	11.0771	7.44762	-0.318182	3.62613	1.3062	Homogeneous	Sucrose	Anosmic	8	1463	0.00546822	274.014	633.825	1	46
exp2_larva_0	0.186954	0.271884	0.927	0.242188	19.4245	7.42909	-0.805556	2.62227	0.826358	Homogeneous	Sucrose	Anosmic	6	3157	0.00190054	273.073	1458.22	1	74
exp2_larva_1	0.21038	0.234111	0.966837	0.277082				2.0276	0.686761	Homogeneous	Sucrose	Anosmic	4	822	0.00486618	40.3738	394.498	1	17
exp2_larva_2	0.214189	0.301138	0.946657	0.266539	18.2347	9.9168	0.774648	2.84937	0.888035	Homogeneous	Sucrose	Anosmic	7	3015	0.00232172	268.483	1421.45	1.75	73
exp2_larva_3	0.271389	0.396375	0.661596	0.208451	17.0497	5.78076	0.470588	2.27144	0.713859	Homogeneous	Sucrose	Anosmic	18	1764	0.0102041	196.354	576.686	1.2	36
exp2_larva_4	0.293819	0.442943	0.962353	0.372894	16.2115	10.1142	-0.238095	2.97975	1.00023	Homogeneous	Sucrose	Anosmic	29	2556	0.0113459	241.783	1215.09	1.26087	65
exp2_larva_5	0.256932	0.317257	0.722878	0.229604	22.9874	12.5681	0.304348	1.63584	0.726066	Homogeneous	Sucrose	Anosmic	0	1491	0	194.425	537.821		25
exp2_larva_6	0.292866	0.464005	0.651299	0.303958	22.1946	15.1648	-0.389831	1.23647	1.00395	Homogeneous	Sucrose	Anosmic	637	5803	0.109771	251.228	1682.94	2.17406	61
exp2_larva_7	0.263262	0.330808	0.68113	0.218533	23.1334	12.5113	-0.549296	1.47029	0.731624	Homogeneous	Sucrose	Anosmic	123	5938	0.020714	199.837	1980	2.23636	73
exp2_larva_8	0.212522	0.279393	0.84472	0.240789	19.0859	8.83545	0.349398	2.37705	0.900822	Homogeneous	Sucrose	Anosmic	9	4127	0.00218076	280.683	1737.18	1.125	85
exp2_larva_9	0.195489	0.235944	0.937902	0.230121	18.4666	8.07431	-0.120879	2.81173	0.865922	Homogeneous	Sucrose	Anosmic	17	3900	0.00435897	280.441	1820.06	1.30769	93
exp3_larva_0	0.282872	0.368732	0.683241	0.257904			0.0909091	1.79296	0.692581	Homogeneous	Sucrose	Anosmic	11	1121	0.00981267	194.3	377.853	1.375	24
exp3_larva_1	0.204637	0.263742	0.845457	0.242539	24.7683	11.0055	-0.84	1.93179	0.730909	Homogeneous	Sucrose	Anosmic	6	1583	0.00379027	281.414	666.248	1.5	27
exp3_larva_2	0.24813	0.327312	0.762246	0.232146	17.7843	13.8018	0.157895	2.01038	0.910091	Homogeneous	Sucrose	Anosmic	29	3264	0.0088848	190.297	1231.52	1.45	59
exp3_larva_3	0.207325	0.278789	0.975587	0.236689	16.9081	6.61243	0.863248	3.19632	0.927085	Homogeneous	Sucrose	Anosmic	10	4287	0.00233263	323.265	2083.92	1.25	119
exp3_larva_4	0.300411	0.393612	0.804366	0.310839	13.428	8.49295	-0.152174	2.91981	0.913553	Homogeneous	Sucrose	Anosmic	35	3839	0.00911696	273.392	1531.37	2.5	94
exp3_larva_5	0.306422	0.387693	0.655788	0.230041	21.5551	8.65819	0.424242	1.62497	0.664264	Homogeneous	Sucrose	Anosmic	121	4812	0.0251455	188.275	1537.13	1.89062	68
exp3_larva_6	0.305229	0.367566	0.682819	0.215675	14.9504	5.93995	0.870968	2.52	0.852995	Homogeneous	Sucrose	Anosmic	67	5998	0.0111704	115.47	2024.88	1.39583	126
exp3_larva_7	0.278496	0.359724	0.740731	0.228887	16.6434	12.5763	-0.105263	1.93297	0.865278	Homogeneous	Sucrose	Anosmic	52	4224	0.0123106	247.263	1541.91	2.26087	78
exp3_larva_8	0.367943	0.405201	0.668608	0.242389	13.9344	7.55555	0.705263	2.49275	0.92959	Homogeneous	Sucrose	Anosmic	41	4451	0.00921141	223.538	1472.78	1.51852	97
exp3_larva_9	0.277814	0.387858	0.857604	0.291508				2.1016	1.03177	Homogeneous	Sucrose	Anosmic	2	472	0.00423729	171.864	200.284	1	14
MEAN	0.283738	0.360168	0.758782	0.246293	16.4306	9.05046	0.142937	2.37749	0.890432				51.2	3138.77	0.0129182	209.579	1158.98	1.55852	64.2667
STD	0.0651291	0.0692043	0.131032	0.0382522	4.37983	2.90155	0.486148	0.588189	0.151578				113.122	1625.37	0.0190821	58.7402	596.877	0.549907	33.5847
N samples	30	30	30	30	27	27	28	30	30				30	30	30	30	30	29	30
ID	turning_rate	std_turning_rate	speed	std_speed	steps	std_steps	handedness	num_turns_min	std_num_turns_min	env	substrate	larva_type	frames_not_moving	recorded_frames	pause_proportion	dist_five_min	crawl_dist	pause_duration	total_turns
exp1_larva_0	0.336683	0.422591	0.485773	0.187621	8.57554	6.75662	0.030303	2.2691	1.01273	Homogeneous	Yeast	Anosmic	146	1714	0.0851809	148.503	380.459	4.70968	35
exp1_larva_1	0.388644	0.5349	0.49266	0.236039	8.17132	6.3757	-0.254545	2.69912	1.17902	Homogeneous	Yeast	Anosmic	332	4912	0.0675896	158.826	1128.48	2.42336	112
exp1_larva_2	0.378056	0.495699	0.491461	0.210242	6.38233	5.2433	-0.216374	3.39512	1.47667	Homogeneous	Yeast	Anosmic	251	5963	0.0420929	123.14	1403.48	1.83212	173
exp1_larva_3	0.396637	0.478124	0.423539	0.144799	6.20042	6.16739	-0.015873	2.81493	1.11762	Homogeneous	Yeast	Anosmic	58	2743	0.0211447	94.0334	568.574	1.26087	65
exp1_larva_4	0.522132	0.683188	0.326674	0.199539	4.91918	4.87908	0.138462	1.53905	1.64794	Homogeneous	Yeast	Anosmic	1770	5045	0.350842	46.8922	535.934	4.79675	67
exp1_larva_5	0.665682	0.801135	0.234035	0.142295	4.59959	3.05792	0.192308	1.09112	1.29084	Homogeneous	Yeast	Anosmic	2474	5919	0.417976	83.9761	405.879	3.94577	54
exp1_larva_6	0.684774	0.769089	0.241888	0.123114	4.14351	3.48748	0.418182	1.14	1.11059	Homogeneous	Yeast	Anosmic	2215	5998	0.36929	43.7758	460.703	4.18715	57
exp1_larva_7	0.423276	0.615869	0.379468	0.230314	7.78271	3.8776	-0.170732	0.778477	1.3876	Homogeneous	Yeast	Anosmic	3804	5958	0.638469	122.023	409.966	10.8997	43
exp1_larva_8	0.606147	0.846782	0.168741	0.0826901	3.86387	2.20896	1	0.5	0.901665	Homogeneous	Yeast	Anosmic	3738	5998	0.623208	72.5669	195.323	4.94444	25
exp2_larva_0	0.574649	0.696928	0.282411	0.149799	5.15245	3.38287	0.027027	1.63802	1.35919	Homogeneous	Yeast	Anosmic	1660	5657	0.293442	65.6158	567.668	3.27416	76
exp2_larva_1	0.353079	0.475163	0.497479	0.223342	7.09974	6.6288	-0.409836	2.61348	1.61071	Homogeneous	Yeast	Anosmic	777	5737	0.135437	150.741	1234.61	3.73558	124
exp2_larva_2	0.45519	0.571788	0.390528	0.166038	6.87841	5.09276	-0.448276	2.53331	1.15507	Homogeneous	Yeast	Anosmic	206	5735	0.0359198	66.0962	1079.2	1.53731	118
exp2_larva_3	0.549254	0.707893	0.21366	0.122192				0.318366	0.697188	Homogeneous	Yeast	Anosmic	3906	5913	0.660578	77.8383	218.232	7.19337	16
exp2_larva_4	0.676069	1.01215	0.143363	0.0537092				0.158604	0.496126	Homogeneous	Yeast	Anosmic	3891	5623	0.691979	28.1228	130.351	5.27236	8
exp2_larva_5	0.520971	0.601835	0.297079	0.132149	6.45295	3.05324	-0.698925	1.91177	0.933844	Homogeneous	Yeast	Anosmic	1002	5942	0.16863	40.0081	735.321	2.65079	95
exp2_larva_6	0.397183	0.542702	0.483818	0.277518	6.40733	4.7535	0.410072	2.80017	1.96976	Homogeneous	Yeast	Anosmic	1051	5996	0.175284	52.3554	1198.12	3.13731	141
exp2_larva_7	0.511699	0.68313	0.257138	0.149606	6.99665	2.91316	-0.6	0.858603	1.21452	Homogeneous	Yeast	Anosmic	3157	5986	0.527397	28.6829	368.35	5.69856	42
exp2_larva_8	0.431553	0.604794	0.478914	0.292229	5.65962	4.1237	-0.180328	3.59812	2.14185	Homogeneous	Yeast	Anosmic	208	2044	0.101761	50.5642	439.567	1.98095	63
exp2_larva_9	0.266574	0.362809	0.640642	0.236224	8.36699	5.57698	-0.860963	3.79784	1.15855	Homogeneous	Yeast	Anosmic	167	5924	0.0281904	162.504	1842.1	1.94186	189
exp3_larva_0	0.355543	0.46312	0.62115	0.247718	7.30796	4.91203	-0.253333	4.40424	1.65958	Homogeneous	Yeast	Anosmic	30	2095	0.0143198	166.45	640.841	1.36364	77
exp3_larva_1	0.765601	0.901823	0.18034	0.10199	7.33677	4.59636	0.391304	0.500347	0.590168	Homogeneous	Yeast	Anosmic	2661	5874	0.453013	25.288	294.367	3.30149	25
exp3_larva_2	0.639096	0.765378	0.21016	0.117613	5.46141	2.37023	0.818182	0.44228	0.90412	Homogeneous	Yeast	Anosmic	3637	5830	0.623842	65.6308	234.3	6.32522	24
exp3_larva_3	0.434462	0.609073	0.443736	0.254805	7.33677	5.2118	-0.0740741	2.2	1.51745	Homogeneous	Yeast	Anosmic	1262	5998	0.210403	75.3502	1052.44	3.2112	110
exp3_larva_4	0.409779	0.517037	0.436488	0.16417	7.94512	6.06849	0.3	2.44	0.94414	Homogeneous	Yeast	Anosmic	410	5998	0.0683561	130.098	1220.16	2.41176	122
exp3_larva_5										Homogeneous	Yeast	Anosmic	13	21	0.619048	0.532397	0.592909	1.85714	2
exp3_larva_6	0.587203	0.957052	0.143423	0.0587054				0.12	0.405298	Homogeneous	Yeast	Anosmic	4540	5998	0.756919	30.1874	109.009	7.45484	6
exp3_larva_7	0.689189	0.868803	0.237644	0.186404	5.13109	2.79797	-0.459459	0.770049	1.48076	Homogeneous	Yeast	Anosmic	3056	5615	0.544256	14.3862	307.623	4.61631	39
exp3_larva_8	0.389742	0.516419	0.512609	0.229296	8.28176	5.93372	-0.148936	2.87383	1.37164	Homogeneous	Yeast	Anosmic	397	5989	0.0662882	86.969	1434	2.08947	143
exp3_larva_9	0.679902	0.701462	0.268616	0.114455	5.55231	3.76237	-0.129032	1.263	1.2894	Homogeneous	Yeast	Anosmic	2006	5570	0.360144	101.084	480.5	6.8	64
exp3_larva_10	0.332956	0.434695	0.501632	0.164042	7.89185	8.78896	-0.615385	2.36981	1.06954	Homogeneous	Yeast	Anosmic	42	1250	0.0336	150.715	302.911	1.55556	28
MEAN	0.497301	0.642808	0.361554	0.172368	6.53452	4.69312	-0.0696243	1.85651	1.21012				1628.9	4968.17	0.306153	82.0985	645.969	3.88029	71.4333
STD	0.131095	0.164082	0.140106	0.0615369	1.32363	1.53406	0.431098	1.15502	0.389675				1451.93	1695.79	0.243157	47.3996	456.911	2.17416	49.0981
N samples	29	29	29	29	26	26	26	29	29				30	30	30	30	30	30	30

## Sheet: Two_Patches - Sitter
Sitter
ID	turning_rate_in	std_turning_rate_in	turning_rate_out	std_turning_rate_out	handedness_in	handedness_out	speed_in	std_speed_in	speed_out	std_speed_out	steps_in	std_steps_in	steps_out	std_steps_out	dist_turns_in	dist_turns_all	num_turns_min_in	std_num_turns_min_in	num_turns_min_out	std_num_turns_min_out	ratio_in_out	env	substrate	larva_type	dist_labels	frames_not_moving	recorded_frames	pause_proportion	dist_five_min	crawl_dist_inside	crawl_dist_outside	pause_duration_inside	pause_duration_outside	total_turns_inside	total_turns_outside	prop_pause_inside	prop_pause_outside
exp1_larva_0	0.472139	0.614069	0.451418	0.573755	0.15625	0.692308	0.507199	0.325689	0.525483	0.297892	12.3015	6.19308	9.63538	6.43087	[0.57142857 0.81818182 0.38709677 0.8125 0.58333333 1.	[0.07446809 0.23404255 0.32978723 0.17021277 0.12765957 0.03191489	1.60404	1.18473	2.25556	1.18473	0.777971	Two_patches	Sucrose	Sitter	['0-10', '10-20', '20-30', '30-40', '40-50', '50-60', '60-70', '70-80', '80-90', '90-100']	544	5756	0.0945101	73.6334	1019.47	310.823	1.71756	1.64912	68	27	0.100491	0.0617608
															0. 1. 0. 0. ]	0.0106383 0.0106383 0.0106383 0. ]
exp1_larva_1	0.482375	0.628745	0.325845	0.4405	-0.323529		0.592585	0.360433	0.737641	0.270528	12.2577	9.80262			[0.7 0.67857143 0.76666667 1. 1. 0.5	[0.11363636 0.31818182 0.34090909 0.11363636 0.02272727 0.02272727	1.82173	0.565642	2.31135	0.565642	0.844975	Two_patches	Sucrose	Sitter	['0-10', '10-20', '20-30', '30-40', '40-50', '50-60', '60-70', '70-80', '80-90', '90-100']	641	5612	0.11422	140.123	1214.5	317.555	2.23675	1	71	21	0.133488	0.0063593
															1. 0. 0.25 1. ]	0.01136364 0. 0.04545455 0.01136364]
exp1_larva_2	0.506934	0.63543	0.370976	0.501191	0.0666667	0.666667	0.568633	0.299455	0.589731	0.295485	12.6935	8.19144	12.9858	9.32452	[0.66666667 0.73333333 0.88235294 0.55555556 0.5 0.5	[0.20224719 0.16853933 0.19101124 0.1011236 0.06741573 0.04494382	1.57703	0.962978	1.15534	0.962978	0.728649	Two_patches	Sucrose	Sitter	['0-10', '10-20', '20-30', '30-40', '40-50', '50-60', '60-70', '70-80', '80-90', '90-100']	697	5679	0.122733	107.418	1026.38	400.427	3.32051	2.32468	64	26	0.125181	0.0961332
															0.5 1. 1. 0. ]	0.08988764 0.1011236 0.02247191 0.01123596]
exp1_larva_3	0.405999	0.524733	0.35524	0.456763	-0.037037	0.103448	0.642769	0.283813	0.692285	0.255799	12.2436	8.27399	12.6584	10.4358	[0.66666667 1. 0.36363636 0.72727273 0. 0.08333333	[0.02631579 0.01754386 0.09649123 0.09649123 0.02631579 0.10526316	1.97816	0.750975	2.5612	0.750975	0.478854	Two_patches	Sucrose	Sitter	['0-10', '10-20', '20-30', '30-40', '40-50', '50-60', '60-70', '70-80', '80-90', '90-100']	94	5722	0.0164278	141.134	860.346	1016.97	1.25532	1.52174	54	67	0.0215328	0.0107362
															0.68421053 0.66666667 0.54166667 0.85714286]	0.16666667 0.13157895 0.21052632 0.12280702]
exp1_larva_4	0.442836	0.635539	0.344107	0.4922		-0.894737	0.535289	0.315434	0.582046	0.29665					[0. 0. 0. 0. 0. 1.	[0. 0. 0. 0. 0. 0.02631579	1.82979	1.6008	1.77741	1.6008	0.450549	Two_patches	Sucrose	Sitter	['0-10', '10-20', '20-30', '30-40', '40-50', '50-60', '60-70', '70-80', '80-90', '90-100']	174	2184	0.0796703	173.34	242.486	320.416	1.25806	1.6	19	23	0.0792683	0.0191388
															0. 0.46666667 0.5 0.75 ]	0.05263158 0.39473684 0.21052632 0.31578947]
exp1_larva_5	0.491579	0.618268	0.5196	0.636085	-0.291667		0.400661	0.222061	0.398339	0.252984	13.1816	8.30846			[0.83333333 0.5 0.88888889 1. 0. 0.	[0.21818182 0.25454545 0.49090909 0.01818182 0. 0.	1.21242	0	0	0	0.911864	Two_patches	Sucrose	Sitter	['0-10', '10-20', '20-30', '30-40', '40-50', '50-60', '60-70', '70-80', '80-90', '90-100']	706	5639	0.1252	74.4506	903.49	81.6596	2.09091	1.73469	52	4	0.12077	0.0990676
															0. 0. 0. 0. ]	0.01818182 0. 0. 0. ]
exp1_larva_6	0.404242	0.549302	0.361409	0.511141	-0.276596	-0.555556	0.706441	0.346516	0.713316	0.276168	13	6.70148	11.4475	5.48268	[0.85714286 0.65306122 0.96551724 0.9 0.57142857 0.66666667	[0.10294118 0.36029412 0.21323529 0.07352941 0.05147059 0.06617647	2.52613	0.538213	3.52209	0.538213	0.773438	Two_patches	Sucrose	Sitter	['0-10', '10-20', '20-30', '30-40', '40-50', '50-60', '60-70', '70-80', '80-90', '90-100']	179	5760	0.0310764	192.921	1509.31	462.229	1.61905	1.28571	97	40	0.0381594	0.00582524
															0.5 0.85714286 1. 1. ]	0.04411765 0.05147059 0.02941176 0.00735294]
exp1_larva_7	0.535762	0.664275	0.487539	0.625407	0.0612245		0.452704	0.28297	0.512369	0.244242	11.5738	6.39886			[0.8 0.76 0.76923077 0.77777778 0.66666667 0.	[0.15873016 0.3968254 0.20634921 0.14285714 0.04761905 0.	1.27858	0.827161	1.07389	0.827161	0.79831	Two_patches	Sucrose	Sitter	['0-10', '10-20', '20-30', '30-40', '40-50', '50-60', '60-70', '70-80', '80-90', '90-100']	1008	5563	0.181197	117.538	805.586	253.623	3.25185	3.71429	50	18	0.197703	0.0833868
															1. 0. 1. 0. ]	0.01587302 0.01587302 0.01587302 0. ]
exp1_larva_8	0.501691	0.657624	0.413412	0.586131	-0.457627	-0.666667	0.522098	0.367173	0.630404	0.408964	11.0248	6.92328	12.2967	7.04806	[0.6 0.30769231 0.70588235 0.66666667 0.71428571 0.28571429	[0.05882353 0.15294118 0.2 0.17647059 0.08235294 0.08235294	1.6207	0.62801	1.07692	0.62801	0.691393	Two_patches	Sucrose	Sitter	['0-10', '10-20', '20-30', '30-40', '40-50', '50-60', '60-70', '70-80', '80-90', '90-100']	587	5716	0.102694	74.9866	923.852	499.91	1.66802	1.76768	61	31	0.104251	0.0854492
															0.6 0.75 0.8 1. ]	0.11764706 0.04705882 0.05882353 0.02352941]
exp1_larva_9	0.387783	0.540148	0.419464	0.580466	-0.39759	-0.6	0.724774	0.350875	0.623637	0.352749	13.3756	7.56573	14.0909	6.10537	[0.57142857 0.75 0.86111111 0.66666667 0.66666667 0.66666667	[0.175 0.33333333 0.3 0.075 0.05 0.025	2.2678	1.19115	1.40654	1.19115	0.731851	Two_patches	Sucrose	Sitter	['0-10', '10-20', '20-30', '30-40', '40-50', '50-60', '60-70', '70-80', '80-90', '90-100']	299	5620	0.0532028	82.6616	1415.85	434.675	1.62609	1.93103	91	30	0.0454656	0.0593535
															0.66666667 1. 0. 0. ]	0.025 0.01666667 0. 0. ]
exp2_larva_0	0.553513	0.676373	0.436787	0.57974	0.12	0.0526316	0.444706	0.262827	0.618809	0.283813	8.59428	6.07506	8.42708	5.81645	[0.77777778 0.77777778 0.8 0.66666667 0.5 0.5	[0.36986301 0.12328767 0.06849315 0.04109589 0.05479452 0.02739726	1.97462	1.18589	3.02825	1.18589	0.669862	Two_patches	Sucrose	Sitter	['0-10', '10-20', '20-30', '30-40', '40-50', '50-60', '60-70', '70-80', '80-90', '90-100']	454	4798	0.0946228		621.699	474.627	2.51852	2	52	44	0.126945	0.0157426
															0.6 0.75 0.25 0.5 ]	0.06849315 0.05479452 0.05479452 0.1369863 ]
exp2_larva_1	0.518995	0.638691	0.37159	0.515807	-0.0243902		0.453426	0.261481	0.59269	0.239879	9.5672	10.6746			[0.66666667 0.73333333 0.42857143 0.76 0.83333333 0.33333333	[0.15625 0.15625 0.29166667 0.26041667 0.0625 0.03125	1.98174	0.524223	1.67693	0.524223	0.896429	Two_patches	Sucrose	Sitter	['0-10', '10-20', '20-30', '30-40', '40-50', '50-60', '60-70', '70-80', '80-90', '90-100']	578	5909	0.0978169		1067.59	179.289	2.43404	1.2	85	14	0.107986	0.00715137
															1. 0. 1. 0. ]	0.02083333 0.01041667 0.01041667 0. ]
exp2_larva_2	0.523476	0.576507	0.405844	0.445205			0.348243	0.151631	0.350982	0.124823					[0.66666667 0.66666667 0.75 0.75 0.33333333 0.	[0.33333333 0.11111111 0.14814815 0.14814815 0.11111111 0.	1.35554	0.956494	1.13035	0.956494	0.561832	Two_patches	Sucrose	Sitter	['0-10', '10-20', '20-30', '30-40', '40-50', '50-60', '60-70', '70-80', '80-90', '90-100']	212	2620	0.080916	79.4347	247.601	171.63	1.72	6.25926	17	15	0.029212	0.036235
															0. 0. 1. 0.5 ]	0.03703704 0. 0.03703704 0.07407407]
exp2_larva_3	0.396804	0.474113	0.301912	0.377765	0.114754	0.891892	0.486699	0.179621	0.567386	0.149096	9.66224	3.89887	8.7616	7.31926	[0.8 0.5 0.88888889 0.16666667 0.6875 0.72222222	[0.04901961 0.17647059 0.17647059 0.11764706 0.15686275 0.17647059	2.20884	1.13387	3.02698	1.13387	0.683499	Two_patches	Sucrose	Sitter	['0-10', '10-20', '20-30', '30-40', '40-50', '50-60', '60-70', '70-80', '80-90', '90-100']	101	4733	0.0213395	106.921	765.09	419.866	1.57407	2	62	41	0.0262751	0.00551534
															0.75 0.75 1. 0. ]	0.03921569 0.07843137 0.02941176 0. ]
exp2_larva_4	0.485329	0.539955	0.383219	0.357073	0		0.368631	0.183985	0.359418	0.10464	7.7832	9.04559			[0.75 0.71428571 1. 0. 0. 1.	[0.47058824 0.20588235 0.14705882 0. 0. 0.02941176	1.69371	0.445181	1.10415	0.445181	0.851021	Two_patches	Sucrose	Sitter	['0-10', '10-20', '20-30', '30-40', '40-50', '50-60', '60-70', '70-80', '80-90', '90-100']	165	2497	0.0660793	101.057	364.945	61.2807	2.06154	6.2	31	6	0.0630588	0.00772875
															0. 1. 0. 0.75 ]	0. 0.02941176 0. 0.11764706]
MEAN	0.473964	0.598251	0.396557	0.511949	-0.0991955	-0.0344459	0.51699	0.279598	0.566302	0.256914			11.2879	7.24538			1.79539	0.833021	1.80713	0.833021	0.723366					429.267	4920.53	0.085447	112.74	865.88	360.332	2.02349	2.41255	58.2667	27.1333	0.0879858	0.0399722
STD	0.0521701	0.0579853	0.0577625	0.0824677	0.209022	0.635578	0.110169	0.0668466	0.115597	0.0779131			1.96719	1.64538			0.36109	0.386049	0.925061	0.386049	0.135044					267.179	1286.63	0.0423332	37.5334	367.704	221.737	0.614694	1.61377	22.7317	15.6966	0.0486977	0.0355335
N samples	15	15	15	15	13	9	15	15	15	15			8	8			15	15	15	15	15					15	15	15	13	15	15	15	15	15	15	15	15
ID	turning_rate_in	std_turning_rate_in	turning_rate_out	std_turning_rate_out	handedness_in	handedness_out	speed_in	std_speed_in	speed_out	std_speed_out	steps_in	std_steps_in	steps_out	std_steps_out	dist_turns_in	dist_turns_all	num_turns_min_in	std_num_turns_min_in	num_turns_min_out	std_num_turns_min_out	ratio_in_out	env	substrate	larva_type	dist_labels	frames_not_moving	recorded_frames	pause_proportion	dist_five_min	crawl_dist_inside	crawl_dist_outside	pause_duration_inside	pause_duration_outside	total_turns_inside	total_turns_outside	prop_pause_inside	prop_pause_outside
exp1_larva_0	0.490974	0.62296	0.366823	0.443899	-0.0144928	0.275862	0.391386	0.211205	0.506449	0.171794	6.1753	3.92417	7.44773	3.1322	[0. 0.41666667 0.52380952 0.56 0.5625 0.61111111	[0. 0.08955224 0.31343284 0.18656716 0.11940299 0.13432836	2.79048	0.919917	3.50035	0.919917	0.605099	Two_patches	Yeast	Sitter	['0-10', '10-20', '20-30', '30-40', '40-50', '50-60', '60-70', '70-80', '80-90', '90-100']	432	5138	0.0840794		530.132	501.385	2.25287	1.53846	72	63	0.126086	0.013836
															0.72727273 0.42857143 1. 0. ]	0.08208955 0.05223881 0.02238806 0. ]
exp1_larva_1	0.56724	0.724714			0		0.293544	0.205427			5.7132	2.78074			[0. 0.34615385 0.74193548 1. 0. 0.	[0.03278689 0.42622951 0.50819672 0.03278689 0. 0.	1.05221				1	Two_patches	Yeast	Sitter	['0-10', '10-20', '20-30', '30-40', '40-50', '50-60', '60-70', '70-80', '80-90', '90-100']	2522	5805	0.434453	116.366	480.678		4.63603		58	4	0.434453
															0. 0. 0. 0. ]	0. 0. 0. 0. ]
exp1_larva_2	0.528671	0.671726	0.34639	0.44708	0.238095		0.316632	0.210178	0.511441	0.208091	6.84767	5.18178			[0. 0.42857143 0.73333333 1. 0. 0.	[0.03703704 0.25925926 0.55555556 0.14814815 0. 0.	1.33758				0.951927	Two_patches	Yeast	Sitter	['0-10', '10-20', '20-30', '30-40', '40-50', '50-60', '60-70', '70-80', '80-90', '90-100']	583	2205	0.264399		237.79	27.1064	3.62112		23	5	0.277751
															0. 0. 0. 0. ]	0. 0. 0. 0. ]
exp1_larva_3	0.636922	0.729287					0.299445	0.143357							[0. 0.5 0.5 0.66666667 0. 0.	[0. 0.15384615 0.61538462 0.23076923 0. 0.	2.08686				1	Two_patches	Yeast	Sitter	['0-10', '10-20', '20-30', '30-40', '40-50', '50-60', '60-70', '70-80', '80-90', '90-100']	152	661	0.229955		75.46		3.8		12	2	0.229955
															0. 0. 0. 0. ]	0. 0. 0. 0. ]
exp1_larva_4	0.515957	0.655497	0.340115	0.451579	0.215686	0.363636	0.357551	0.198821	0.530735	0.206202	5.49147	3.12105	7.36805	3.54111	[0.33333333 0.57446809 0.63636364 0.66666667 0.6 0.33333333	[0.11904762 0.37301587 0.26190476 0.0952381 0.03968254 0.02380952	2.35271	0.535958	3.77804	0.535958	0.880448	Two_patches	Yeast	Sitter	['0-10', '10-20', '20-30', '30-40', '40-50', '50-60', '60-70', '70-80', '80-90', '90-100']	997	5897	0.169069		753.359	180.715	2.67308	1.5	103	24	0.187404	0.029703
															0.5 1. 0. 0. ]	0.06349206 0.02380952 0. 0. ]
exp1_larva_5	0.667314	0.751547	0.443362	0.50655	0.134328		0.236984	0.115599	0.364773	0.137574	4.14012	2.24234			[0. 0.16 0.65909091 0.8 0.5 0.	[0. 0.32051282 0.56410256 0.06410256 0.02564103 0.02564103	1.65717	0.755248	2.36	0.755248	0.960869	Two_patches	Yeast	Sitter	['0-10', '10-20', '20-30', '30-40', '40-50', '50-60', '60-70', '70-80', '80-90', '90-100']	1599	5571	0.287022	59.2941	443.989	38.6659	4.11628	1	71	8	0.29759	0.00927357
															0. 0. 0. 0. ]	0. 0. 0. 0. ]
exp1_larva_6	0.657513	0.760652	0.520963	0.624791	0.0909091		0.210849	0.134494	0.269792	0.120365	4.88141	3.47532			[0. 0.30769231 0.72413793 0.54545455 0. 0.	[0. 0.24528302 0.54716981 0.20754717 0. 0.	0.837327	0.672964	1.98438	0.672964	0.915604	Two_patches	Yeast	Sitter	['0-10', '10-20', '20-30', '30-40', '40-50', '50-60', '60-70', '70-80', '80-90', '90-100']	1531	5332	0.287134	48.2272	358.127	52.2047	2.99796	1.9375	41	13	0.300901	0.0554562
															0. 0. 0. 0. ]	0. 0. 0. 0. ]
exp1_larva_8	0.474434	0.597702	0.407155	0.477864	-0.555556	-0.571429	0.369478	0.171728	0.438064	0.175251	6.17574	3.68392	6.08403	2.79511	[0.69230769 0.38888889 0.60377358 0.52941176 0.5 0.65	[0.09774436 0.13533835 0.39849624 0.12781955 0.09022556 0.15037594	2.36035	0.706302	4.13244	0.706302	0.75541	Two_patches	Yeast	Sitter	['0-10', '10-20', '20-30', '30-40', '40-50', '50-60', '60-70', '70-80', '80-90', '90-100']	586	5638	0.103938	83.2749	690.739	284.741	1.90977	1.5	88	46	0.119277	0.0448018
															0. 0. 0. 0. ]	0. 0. 0. 0. ]
exp1_larva_9	0.580926	0.675048	0.444782	0.572771	0.409091	0.567568	0.327668	0.185738	0.383617	0.190132	4.9547	2.56557	5.04119	2.99525	[0. 0.3 0.38235294 0.86206897 0. 0.55555556	[0. 0.11235955 0.38202247 0.3258427 0.05617978 0.1011236	2.48013	1.92009	2.58674	1.92009	0.541305	Two_patches	Yeast	Sitter	['0-10', '10-20', '20-30', '30-40', '40-50', '50-60', '60-70', '70-80', '80-90', '90-100']	805	4031	0.199702		297.523	268.148	2.93443	4.42574	51	39	0.16407	0.117077
															1. 0. 0. 0. ]	0.02247191 0. 0. 0. ]
exp2_larva_1	0.62954	0.851176					0.178354	0.137613							[1. 0.6875 0. 0. 0. 0. 0. 0. 0. 0. ]	[0.15789474 0.84210526 0. 0. 0. 0.	0.343415				1	Two_patches	Yeast	Sitter	['0-10', '10-20', '20-30', '30-40', '40-50', '50-60', '60-70', '70-80', '80-90', '90-100']	3824	5956	0.642042		189.591		5.50216		18	2	0.642042
																0. 0. 0. 0. ]
exp2_larva_2	0.490403	0.595789	0.45133	0.56702	0.721519		0.335676	0.147676	0.355257	0.124894	6.84767	3.64207			[0.4 0.56 0.70967742 0.76923077 1. 0.	[0.17045455 0.28409091 0.35227273 0.14772727 0.04545455 0.	2.15373				0.948876	Two_patches	Yeast	Sitter	['0-10', '10-20', '20-30', '30-40', '40-50', '50-60', '60-70', '70-80', '80-90', '90-100']	571	4714	0.121129	55.4294	654.066	41.2099	3.19209	1.5	82	7	0.126313	0.00392927
															0. 0. 0. 0. ]	0. 0. 0. 0. ]
exp2_larva_3	0.632848	0.688415			0.333333		0.23581	0.10019			4.25735	2.45706			[0.5 0.5 0.75 0.46666667 0.72727273 0.33333333	[0.1754386 0.1754386 0.14035088 0.26315789 0.19298246 0.05263158	2.15103				1	Two_patches	Yeast	Sitter	['0-10', '10-20', '20-30', '30-40', '40-50', '50-60', '60-70', '70-80', '80-90', '90-100']	484	3142	0.154042		312.802		2.73446		55	3	0.154042
															0. 0. 0. 0. ]	0. 0. 0. 0. ]
exp2_larva_4	0.681127	0.804367	0.652254	0.719998	-0.285714		0.223395	0.130544	0.223864	0.0937652	4.035	2.69105			[0.54545455 0.60714286 0.55555556 1. 0. 0.	[0.2244898 0.57142857 0.18367347 0.02040816 0. 0.	0.982788				0.945908	Two_patches	Yeast	Sitter	['0-10', '10-20', '20-30', '30-40', '40-50', '50-60', '60-70', '70-80', '80-90', '90-100']	2071	5047	0.410343		303.035	29.2142	4.63739	1	43	7	0.431295	0.00978793
															0. 0. 0. 0. ]	0. 0. 0. 0. ]
exp2_larva_5	0.579687	0.716699			-0.157895		0.257015	0.169495			5.19473	2.97003			[0. 0.46666667 0.71428571 1. 0. 0.	[0.05172414 0.51724138 0.36206897 0.06896552 0. 0.	1.20803				1	Two_patches	Yeast	Sitter	['0-10', '10-20', '20-30', '30-40', '40-50', '50-60', '60-70', '70-80', '80-90', '90-100']	2441	5671	0.430436		414.951		5.01232		58	1	0.430436
															0. 0. 0. 0. ]	0. 0. 0. 0. ]
exp2_larva_6	0.736255	0.842838	0.837503	0.937352	0		0.191275	0.109069	0.291013	0.403412	3.08727	3.26117			[0.375 0.52941176 0.66666667 1. 0. 0.	[0.21052632 0.44736842 0.31578947 0.02631579 0. 0.	0.686656				0.970385	Two_patches	Yeast	Sitter	['0-10', '10-20', '20-30', '30-40', '40-50', '50-60', '60-70', '70-80', '80-90', '90-100']	2427	5504	0.440952		284.33	13.3866	3.4764	4.375	35	4	0.441303	0.106222
															0. 0. 0. 0. ]	0. 0. 0. 0. ]
exp2_larva_7	0.4971	0.597732	0.540064	0.648169	0.133333	-0.166667	0.39648	0.197442	0.335537	0.17392	5.32532	3.20478	6.29111	4.79866	[0.3 0.52941176 0.61290323 0.8 1. 0.	[0.09615385 0.32692308 0.29807692 0.04807692 0.00961538 0.	2.62097	1.15827	1.52802	1.15827	0.531515	Two_patches	Yeast	Sitter	['0-10', '10-20', '20-30', '30-40', '40-50', '50-60', '60-70', '70-80', '80-90', '90-100']	1007	5315	0.189464		485.687	309.365	2.50345	3.08134	67	39	0.128496	0.202835
															0.66666667 0.66666667 0.44444444 0.5 ]	0.02884615 0.02884615 0.08653846 0.07692308]
exp2_larva_8	0.471471	0.649543	0.468288	0.600401	0.333333		0.338642	0.204822	0.425944	0.201276	7.06444	4.01739			[0.42857143 0.56521739 0.66666667 0.75 0.54545455 0.	[0.109375 0.359375 0.234375 0.125 0.171875 0. 0. 0.	1.10099	0.483483	2.37255	0.483483	0.940716	Two_patches	Yeast	Sitter	['0-10', '10-20', '20-30', '30-40', '40-50', '50-60', '60-70', '70-80', '80-90', '90-100']	2129	5499	0.387161	107.256	515.921	67.9381	5.75339	1.2	55	10	0.4104	0.00725514
															0. 0. 0. 0. ]	0. 0. ]
exp2_larva_9	0.626551	0.725743			-0.037037		0.218821	0.108328			5.1387	2.83371			[0. 0.52941176 0.81818182 0. 0. 0.	[0.09677419 0.5483871 0.35483871 0. 0. 0.	0.952717				1	Two_patches	Yeast	Sitter	['0-10', '10-20', '20-30', '30-40', '40-50', '50-60', '60-70', '70-80', '80-90', '90-100']	1311	3444	0.380662		232.279		3.78902		28	4	0.380662
															0. 0. 0. 0. ]	0. 0. 0. 0. ]
exp3_larva_1	0.664217	0.756915	0.540853	0.671767	-0.0909091	0.2	0.231711	0.109308	0.316906	0.1347	4.25184	2.80348	6.54919	4.22892	[0. 0.4 0.66666667 0.45454545 0.33333333 0.41176471	[0. 0.07352941 0.08823529 0.16176471 0.17647059 0.25	1.40666	1.00607	2.34325	1.00607	0.783177	Two_patches	Yeast	Sitter	['0-10', '10-20', '20-30', '30-40', '40-50', '50-60', '60-70', '70-80', '80-90', '90-100']	1327	5968	0.222353	49.2276	396.574	192.52	2.73684	1.19697	55	27	0.267009	0.0595777
															0.66666667 0.66666667 0. 0.28571429]	0.08823529 0.04411765 0.01470588 0.10294118]
exp3_larva_2	0.618712	0.742069			0.469388		0.211802	0.119746			3.88799	1.66258			[0.5 0.61111111 0.61904762 0. 0. 0.	[0.23529412 0.35294118 0.41176471 0. 0. 0.	1.01547				1	Two_patches	Yeast	Sitter	['0-10', '10-20', '20-30', '30-40', '40-50', '50-60', '60-70', '70-80', '80-90', '90-100']	2885	5918	0.487496		320.775		4.78441		50	2	0.487496
															0. 0. 0. 0. ]	0. 0. 0. 0. ]
exp3_larva_3	0.464948	0.571634	0.413922	0.530926	0.204301	0.204819	0.385463	0.187231	0.420973	0.180676	4.73432	2.88755	5.76764	3.03046	[0.25 0.53333333 0.5 0. 0.6 0.58823529	[0.03389831 0.12711864 0.03389831 0.00847458 0.04237288 0.1440678	3.60698	1.00587	3.44247	1.00587	0.506032	Two_patches	Yeast	Sitter	['0-10', '10-20', '20-30', '30-40', '40-50', '50-60', '60-70', '70-80', '80-90', '90-100']	327	5968	0.0547922	65.9226	550.249	585.784	1.47273	1.68367	94	85	0.0536424	0.0553691
															0.33333333 0.375 0.27272727 0.44 ]	0.02542373 0.06779661 0.09322034 0.42372881]
exp3_larva_4	0.719476	0.94605					0.161191	0.115558							[0.28571429 0.625 1. 0. 0. 0.	[0.38888889 0.44444444 0.16666667 0. 0. 0.	0.267245				1	Two_patches	Yeast	Sitter	['0-10', '10-20', '20-30', '30-40', '40-50', '50-60', '60-70', '70-80', '80-90', '90-100']	3184	5125	0.621268		156.113		4.31436		15	4	0.621268
															0. 0. 0. 0. ]	0. 0. 0. 0. ]
exp3_larva_5	0.722183	0.814466			0		0.192241	0.0822281			3.7687	1.65788			[0.25 0.63636364 0.58333333 0. 0. 0.	[0.14814815 0.40740741 0.44444444 0. 0. 0.	1.32093				1	Two_patches	Yeast	Sitter	['0-10', '10-20', '20-30', '30-40', '40-50', '50-60', '60-70', '70-80', '80-90', '90-100']	977	2579	0.378829		153.409	0	3.70076		26	2	0.378829
															0. 0. 0. 0. ]	0. 0. 0. 0. ]
exp3_larva_6	0.721729	0.93241					0.153947	0.0746845							[0. 0.2 0.71428571 1. 0. 0.	[0. 0.35714286 0.5 0.14285714 0. 0.	0.230452				1	Two_patches	Yeast	Sitter	['0-10', '10-20', '20-30', '30-40', '40-50', '50-60', '60-70', '70-80', '80-90', '90-100']	3287	5102	0.644257		138.937	0	4.64922		13	2	0.644257
															0. 0. 0. 0. ]	0. 0. 0. 0. ]
exp3_larva_7	0.664452	0.773819	0.664463	0.608641	-0.137255		0.212295	0.0923374	0.258162	0.0968086	5.25595	3.77435			[0.25 0.5 0.57575758 0.54545455 0. 0.	[0.06896552 0.17241379 0.56896552 0.18965517 0. 0.	1.19148	0	4	0	0.966819	Two_patches	Yeast	Sitter	['0-10', '10-20', '20-30', '30-40', '40-50', '50-60', '60-70', '70-80', '80-90', '90-100']	1115	5455	0.2044		441.787	22.202	2.20319	1.125	51	8	0.209708	0.0123967
															0. 0. 0. 0. ]	0. 0. 0. 0. ]
exp3_larva_9	0.60735	0.711016			-0.157895		0.251438	0.115306			4.59618	3.01277			[0.33333333 0.43478261 0.58823529 1. 0. 0.	[0.09090909 0.34848485 0.51515152 0.04545455 0. 0.	1.79328				1	Two_patches	Yeast	Sitter	['0-10', '10-20', '20-30', '30-40', '40-50', '50-60', '60-70', '70-80', '80-90', '90-100']	783	4278	0.183029	74.0046	437.628	0	2.44687		63	4	0.183029
															0. 0. 0. 0. ]	0. 0. 0. 0. ]
exp3_larva_10	0.71832	0.883207	0.7081	0.899943			0.167039	0.0737701	0.166854	0.068862					[0.75 0.5 0.625 0. 0. 0. 0. 0. 0. 0. ]	[0.44444444 0.11111111 0.44444444 0. 0. 0.	0.326183				0.983789	Two_patches	Yeast	Sitter	['0-10', '10-20', '20-30', '30-40', '40-50', '50-60', '60-70', '70-80', '80-90', '90-100']	3241	5675	0.571101		197.774	5.17246	4.23615	3	16	3	0.575139	0.0719424
																0. 0. 0. 0. ]
MEAN	0.60616	0.733075	0.509148	0.606797	0.0839348	0.124827	0.264672	0.142663	0.362461	0.167983	5.08296	3.08412	6.36413	3.5031			1.4931	0.833107	2.91166	0.833107	0.895847					1577.7	4838.44	0.317908	73.2225	372.359	137.882	3.55877	2.00425	49.7407	15.4815	0.322328	0.0532975
STD	0.0864307	0.0991519	0.137471	0.142659	0.272477	0.350031	0.0751791	0.0440547	0.103005	0.0737032	1.04715	0.774451	0.79337	0.689393			0.848769	0.457956	0.844861	0.457956	0.158737					1047.47	1317.97	0.172071	23.2993	172.963	172.374	1.10798	1.11986	25.2111	20.9273	0.171841	0.0528352
N samples	27	27	16	16	22	7	27	27	16	16	22	22	7	7			27	11	11	11	27					27	27	27	9	27	19	27	15	27	27	27	15
ID	turning_rate_in	std_turning_rate_in	turning_rate_out	std_turning_rate_out	handedness_in	handedness_out	speed_in	std_speed_in	speed_out	std_speed_out	steps_in	std_steps_in	steps_out	std_steps_out	dist_turns_in	dist_turns_all	num_turns_min_in	std_num_turns_min_in	num_turns_min_out	std_num_turns_min_out	ratio_in_out	env	substrate	larva_type	dist_labels	frames_not_moving	recorded_frames	pause_proportion	dist_five_min	crawl_dist_inside	crawl_dist_outside	pause_duration_inside	pause_duration_outside	total_turns_inside	total_turns_outside	prop_pause_inside	prop_pause_outside
exp1_larva_0	0.453057	0.62813	0.308918	0.396921	0.28		0.376628	0.253418	0.62402	0.191009	11.0205	7.70442			[0.75 0.9 0.6 0.8 0. 0.5 1. 1. 1. 1. ]	[0.09090909 0.22727273 0.22727273 0.22727273 0.02272727 0.04545455	0.264042	0.741832	2.31626	0.741832	0.848335	Two_patches	Apple_juice	Sitter	['0-10', '10-20', '20-30', '30-40', '40-50', '50-60', '60-70', '70-80', '80-90', '90-100']	2364	5855	0.403757		489.239	275.817	6.41576	1	28	19	0.475337	0.00290416
																0.02272727 0.02272727 0.06818182 0.04545455]
exp1_larva_1	0.442995	0.5511	0.48419	0.613734	0.0461538		0.461945	0.228159	0.403992	0.22738	12.5706	5.30213			[0.5 0.65217391 0.85714286 0.875 1. 0.	[0.11904762 0.27380952 0.5 0.0952381 0.01190476 0.	1.71485	0.413154	0.781609	0.413154	0.865672	Two_patches	Apple_juice	Sitter	['0-10', '10-20', '20-30', '30-40', '40-50', '50-60', '60-70', '70-80', '80-90', '90-100']	468	5896	0.0793758	102.406	1083.95	146.447	2.31792	1.21818	67	18	0.0785658	0.0747768
															0. 0. 0. 0. ]	0. 0. 0. 0. ]
exp1_larva_2	0.384144	0.480309	0.443457	0.562185	-0.0526316		0.555182	0.268694	0.622678	0.286199	14.2746	7.17416			[0.66666667 0.89285714 0.88679245 1. 0. 0.	[0.12121212 0.28282828 0.53535354 0.06060606 0. 0.	1.85258				0.929998	Two_patches	Apple_juice	Sitter	['0-10', '10-20', '20-30', '30-40', '40-50', '50-60', '60-70', '70-80', '80-90', '90-100']	103	5657	0.0182075	129.591	1425.43	122.356	1.36	1	86	14	0.0193879	0.00135318
															0. 0. 0. 0. ]	0. 0. 0. 0. ]
exp1_larva_3	0.450727	0.542448	0.383899	0.516446	-0.0731707		0.496155	0.233803	0.548779	0.236188	12.6769	6.3577			[0.61538462 0.61764706 0.81818182 1. 0. 0.	[0.13684211 0.35789474 0.46315789 0.04210526 0. 0.	1.74204				0.960607	Two_patches	Apple_juice	Sitter	['0-10', '10-20', '20-30', '30-40', '40-50', '50-60', '60-70', '70-80', '80-90', '90-100']	171	5737	0.0298065	120.07	1320.27	61.7376	1.57407	1	87	9	0.0308474	0.00204499
															0. 0. 0. 0. ]	0. 0. 0. 0. ]
exp1_larva_4	0.465502	0.587501	0.552286	0.647125	0.05		0.362193	0.206797	0.459912	0.211374	13.5376	5.97974			[0.14285714 0.63636364 0.81818182 1. 0. 0.	[0.15217391 0.23913043 0.47826087 0.13043478 0. 0.	0.751605				0.955942	Two_patches	Apple_juice	Sitter	['0-10', '10-20', '20-30', '30-40', '40-50', '50-60', '60-70', '70-80', '80-90', '90-100']	1450	5924	0.244767	124.083	762.96	58.6388	3.84309	1.66667	41	6	0.255165	0.0148368
															0. 0. 0. 0. ]	0. 0. 0. 0. ]
exp1_larva_5	0.418451	0.515097	0.333178	0.434411	0.255814	0.404255	0.498357	0.231188	0.637611	0.20709	11.4598	5.14819	11.8198	7.11296	[0. 0.14285714 0.625 1. 0.33333333 0.5	[0. 0.08860759 0.20253165 0.11392405 0.03797468 0.02531646	2.04738	0.878174	2.37652	0.878174	0.556951	Two_patches	Apple_juice	Sitter	['0-10', '10-20', '20-30', '30-40', '40-50', '50-60', '60-70', '70-80', '80-90', '90-100']	104	4776	0.0217755	108.032	640.389	667.898	1.27273	1.66667	45	51	0.0315789	0.00598802
															0.66666667 0.27272727 0.21428571 0.57142857]	0.03797468 0.13924051 0.17721519 0.17721519]
exp1_larva_6	0.405186	0.505865	0.404916	0.586919	0.416667		0.492734	0.229631	0.548462	0.26834	12.9101	6.78936			[0.33333333 0.65384615 0.75 0.9047619 1. 0.	[0.06896552 0.29885057 0.32183908 0.24137931 0.03448276 0.01149425	1.83065	0.647356	0.284483	0.647356	0.841708	Two_patches	Apple_juice	Sitter	['0-10', '10-20', '20-30', '30-40', '40-50', '50-60', '60-70', '70-80', '80-90', '90-100']	421	5831	0.0722003	124.761	1145.36	207.319	2.07317	3.77273	73	17	0.051956	0.152015
															1. 1. 0. 0. ]	0.01149425 0.01149425 0. 0. ]
exp1_larva_7	0.410088	0.517375	0.345951	0.349962	-0.075		0.508052	0.253337	0.581225	0.209764	12.1617	5.89502			[0.75 0.93548387 0.88888889 1. 1. 0.	[0.08988764 0.34831461 0.50561798 0.04494382 0.01123596 0.	1.70181				0.973775	Two_patches	Apple_juice	Sitter	['0-10', '10-20', '20-30', '30-40', '40-50', '50-60', '60-70', '70-80', '80-90', '90-100']	803	5796	0.138544	114.041	1227.2	43.0106	4.13402	1	84	6	0.142098	0.00280899
															0. 0. 0. 0. ]	0. 0. 0. 0. ]
exp1_larva_8	0.3915	0.458375	0.364611	0.452355	0.030303	-0.272727	0.49829	0.227932	0.582371	0.246147	14.75	8.01123	12.3446	8.54477	[0.33333333 0.42105263 0.71428571 0.76190476 0.75 0.66666667	[0.03333333 0.21111111 0.38888889 0.23333333 0.08888889 0.03333333	1.7187	0.591746	2.47929	0.591746	0.777232	Two_patches	Apple_juice	Sitter	['0-10', '10-20', '20-30', '30-40', '40-50', '50-60', '60-70', '70-80', '80-90', '90-100']	240	5903	0.0406573	137.533	1094.99	367.476	2.1	2.68421	65	26	0.0411944	0.036119
															0. 1. 0. 0. ]	0. 0.01111111 0. 0. ]
exp1_larva_9	0.407643	0.487682	0.419778	0.49661	0		0.433878	0.207109	0.553624	0.231487	13.1345	7.48427			[0.25 0.4375 0.61290323 0.95454545 0. 0.	[0.1038961 0.20779221 0.4025974 0.28571429 0. 0.	1.38159				0.904284	Two_patches	Apple_juice	Sitter	['0-10', '10-20', '20-30', '30-40', '40-50', '50-60', '60-70', '70-80', '80-90', '90-100']	374	5882	0.0635838	65.0138	1072.76	153.631	1.81683	1.16667	63	15	0.0689979	0.010279
															0. 0. 0. 0. ]	0. 0. 0. 0. ]
exp2_larva_0	0.700753	0.764196			-0.272727		0.271925	0.167912			6.1903	4.26931			[0.625 0.57894737 0.75 1. 0. 0.	[0.23529412 0.55882353 0.11764706 0.08823529 0. 0.	1.04093				0.998233	Two_patches	Apple_juice	Sitter	['0-10', '10-20', '20-30', '30-40', '40-50', '50-60', '60-70', '70-80', '80-90', '90-100']	658	3962	0.166078	54.7567	448.133	0.292997	1.72559	2	33	2	0.16536	0.040404
															0. 0. 0. 0. ]	0. 0. 0. 0. ]
exp2_larva_1	0.413346	0.571103	0.475727	0.565051	-0.428571		0.563602	0.329702	0.527608	0.266456	12.4788	6.30813			[1. 0.5 0.70588235 0.33333333 0.42857143 0.6	[0.01315789 0.13157895 0.22368421 0.07894737 0.09210526 0.19736842	2.148	0.632203	4.46982	0.632203	0.865747	Two_patches	Apple_juice	Sitter	['0-10', '10-20', '20-30', '30-40', '40-50', '50-60', '60-70', '70-80', '80-90', '90-100']	309	3985	0.0775408	159.974	891.337	134.012	1.71084	1.47059	62	15	0.0823188	0.0413907
															0.72727273 0.6 0.66666667 1. ]	0.14473684 0.06578947 0.03947368 0.01315789]
exp2_larva_2	0.428505	0.557924	0.267904	0.414285	0	0.416667	0.494177	0.264632	0.732659	0.253434	20.7351	11.3754	16.0556	15.6523	[0. 0.7 0.875 0.55555556 1. 0.66666667	[0. 0.22222222 0.17777778 0.2 0.06666667 0.13333333	1.12995	0.96389	1.69082	0.96389	0.651978	Two_patches	Apple_juice	Sitter	['0-10', '10-20', '20-30', '30-40', '40-50', '50-60', '60-70', '70-80', '80-90', '90-100']	180	3994	0.0450676	84.4518	599.684	506.267	1.95455	1.14286	24	26	0.0660522	0.00551724
															1. 0.66666667 1. 1. ]	0.08888889 0.06666667 0.02222222 0.02222222]
exp2_larva_3	0.443274	0.557472	0.26513	0.385297	-0.584906	-0.641026	0.499218	0.253427	0.795775	0.256377	8.88907	6.62437	11.0739	4.30045	[1. 0.46666667 0.69565217 0.70588235 0.2 0.6875	[0.07446809 0.15957447 0.24468085 0.18085106 0.10638298 0.17021277	2.28784	0.977506	4.25374	0.977506	0.698127	Two_patches	Apple_juice	Sitter	['0-10', '10-20', '20-30', '30-40', '40-50', '50-60', '60-70', '70-80', '80-90', '90-100']	154	4005	0.0384519	113.261	663.212	472.69	1.6962	2.22222	54	41	0.0479256	0.0158983
															1. 1. 0. 0. ]	0.04255319 0.0212766 0. 0. ]
exp2_larva_4	0.642599	0.726234	0.715251	0.756906	0.16129		0.288668	0.18077	0.277964	0.130693	8.55162	4.9018			[0. 0.59090909 0.76923077 1. 0. 0.	[0.05128205 0.56410256 0.33333333 0.05128205 0. 0.	1.00776	0.504314	1.33215	0.504314	0.891057	Two_patches	Apple_juice	Sitter	['0-10', '10-20', '20-30', '30-40', '40-50', '50-60', '60-70', '70-80', '80-90', '90-100']	559	4048	0.138093	76.7992	444.982	56.1488	1.66561	1.56522	32	8	0.144996	0.0805369
															0. 0. 0. 0. ]	0. 0. 0. 0. ]
exp2_larva_5	0.532934	0.68815	0.39649	0.543865	0.555556	0.12	0.345811	0.205638	0.546464	0.244131	10.7865	5.55464	10.503	5.27439	[0.88888889 0.76923077 0.5 0.71428571 0.75 0.4	[0.16981132 0.24528302 0.11320755 0.13207547 0.1509434 0.09433962	0.854584	0.743369	2.99072	0.743369	0.725843	Two_patches	Apple_juice	Sitter	['0-10', '10-20', '20-30', '30-40', '40-50', '50-60', '60-70', '70-80', '80-90', '90-100']	507	4005	0.126592		418.085	293.178	2.05983	1.66667	27	27	0.165807	0.021796
															1. 1. 0. 0. ]	0.0754717 0.01886792 0. 0. ]
exp2_larva_6	0.471983	0.614357	0.39235	0.485722	-0.428571		0.446676	0.255066	0.501148	0.259288	8.72138	4.69161			[0.66666667 0.46666667 0.5 0.61904762 0.66666667 1.	[0.04054054 0.2027027 0.13513514 0.28378378 0.24324324 0.09459459	1.69684				0.847194	Two_patches	Apple_juice	Sitter	['0-10', '10-20', '20-30', '30-40', '40-50', '50-60', '60-70', '70-80', '80-90', '90-100']	289	3992	0.0723948	82.0752	697.708	143.579	1.54268	1.8	56	19	0.0748078	0.0535714
															0. 0. 0. 0. ]	0. 0. 0. 0. ]
exp2_larva_7	0.516194	0.624549	0.455108	0.604744	-0.625		0.415009	0.237898	0.5258	0.261218	8.16337	4.48916			[0.5 0.65217391 0.3 0.69565217 1. 1.	[0.05882353 0.33823529 0.14705882 0.33823529 0.07352941 0.04411765	1.59591	0.850627	3.15404	0.850627	0.822156	Two_patches	Apple_juice	Sitter	['0-10', '10-20', '20-30', '30-40', '40-50', '50-60', '60-70', '70-80', '80-90', '90-100']	334	4026	0.0829608		621.477	182.716	1.7486	1.75	47	22	0.0945619	0.0282258
															0. 0. 0. 0. ]	0. 0. 0. 0. ]
exp2_larva_8	0.452008	0.570715	0.328253	0.455013	0.5	0.310345	0.455687	0.240581	0.616339	0.241687	13.1399	6.72772	14.0807	7.21113	[0. 0.9 0.625 0.8 0.5 0.5	[0.05882353 0.19607843 0.15686275 0.09803922 0.11764706 0.03921569	1.37618	0.718196	2.42526	0.718196	0.61332	Two_patches	Apple_juice	Sitter	['0-10', '10-20', '20-30', '30-40', '40-50', '50-60', '60-70', '70-80', '80-90', '90-100']	173	4024	0.042992	91.745	524.496	474.89	1.86047	1	31	33	0.0648298	0.00819672
															1. 0.4 1. 0.33333333]	0.01960784 0.09803922 0.09803922 0.11764706]
exp2_larva_9	0.544541	0.635601	0.62277	0.705141	0.0454545		0.335919	0.175821	0.290921	0.139003	9.24747	5.44848			[0.73684211 0.88888889 0.75 0.75 0. 0.	[0.35849057 0.33962264 0.22641509 0.0754717 0. 0.	1.62582	0.469647	1.68822	0.469647	0.868885	Two_patches	Apple_juice	Sitter	['0-10', '10-20', '20-30', '30-40', '40-50', '50-60', '60-70', '70-80', '80-90', '90-100']	284	4027	0.070524	87.1881	546.036	70.9846	1.5641	1.33333	44	10	0.0697342	0.0720721
															0. 0. 0. 0. ]	0. 0. 0. 0. ]
exp3_larva_0	0.667322	0.727929	0.601589	0.626035	-0.454545		0.294008	0.173266	0.396023	0.244419	11.1109	5.28403			[0.4 0.54166667 0.72222222 0.66666667 1. 0.	[0.09803922 0.47058824 0.35294118 0.05882353 0.01960784 0.	1.02548				0.977946	Two_patches	Apple_juice	Sitter	['0-10', '10-20', '20-30', '30-40', '40-50', '50-60', '60-70', '70-80', '80-90', '90-100']	759	5804	0.130772		722.377	23.9594	1.63834	1.4	46	6	0.132488	0.0216049
															0. 0. 0. 0. ]	0. 0. 0. 0. ]
exp3_larva_1	0.676887	0.76573	0.626573	0.677533	-0.363636		0.241449	0.139911	0.333178	0.159919	6.64267	4.9574			[0.77777778 0.64285714 1. 0. 0. 0.	[0.3 0.46666667 0.23333333 0. 0. 0.	0.316691				0.952464	Two_patches	Apple_juice	Sitter	['0-10', '10-20', '20-30', '30-40', '40-50', '50-60', '60-70', '70-80', '80-90', '90-100']	2076	5743	0.361484		410.101	43.3132	3.81331	1	25	6	0.377148	0.0245283
															0. 0. 0. 0. ]	0. 0. 0. 0. ]
exp3_larva_2	0.623197	0.703376	0.622445	0.769698	-0.0909091		0.269014	0.149938	0.271418	0.17009	7.74215	3.11522			[0.77777778 0.41666667 0.61904762 1. 0. 0.	[0.19148936 0.25531915 0.44680851 0.10638298 0. 0.	1.03501	0.453256	0.19467	0.453256	0.755552	Two_patches	Apple_juice	Sitter	['0-10', '10-20', '20-30', '30-40', '40-50', '50-60', '60-70', '70-80', '80-90', '90-100']	1485	5764	0.257634		479.383	96.3533	1.96992	6.2973	36	12	0.180482	0.424924
															0. 0. 0. 0. ]	0. 0. 0. 0. ]
exp3_larva_3	0.634711	0.724683	0.716508	0.703473	-0.0731707		0.279807	0.172451	0.254503	0.143459	10.5371	6.18789			[0.625 0.52941176 0.85 1. 0. 0.	[0.17391304 0.36956522 0.43478261 0.02173913 0. 0.	0.958425	0.489265	0.603053	0.489265	0.902906	Two_patches	Apple_juice	Sitter	['0-10', '10-20', '20-30', '30-40', '40-50', '50-60', '60-70', '70-80', '80-90', '90-100']	885	5953	0.148665		647.193	55.8633	1.492	2.17188	42	5	0.138791	0.2224
															0. 0. 0. 0. ]	0. 0. 0. 0. ]
exp3_larva_4	0.62666	0.7031	0.635695	0.719581	-0.0869565		0.307464	0.192969	0.362025	0.225022	9.00087	6.77399			[0.57142857 0.6 0.73076923 1. 0. 0.	[0.13207547 0.28301887 0.49056604 0.09433962 0. 0.	1.02256	0	1	0	0.95248	Two_patches	Apple_juice	Sitter	['0-10', '10-20', '20-30', '30-40', '40-50', '50-60', '60-70', '70-80', '80-90', '90-100']	628	5766	0.108914		750.519	45.2531	1.5369	1.84615	47	7	0.109978	0.0472441
															0. 0. 0. 0. ]	0. 0. 0. 0. ]
exp3_larva_5	0.62855	0.729627	0.516038	0.600591	0.2	0.125	0.298404	0.184515	0.448544	0.226655	9.43106	8.31727	10	6.5116	[0.66666667 0.5 0.5 0.29411765 0.86666667 1.	[0.04615385 0.18461538 0.18461538 0.26153846 0.23076923 0.06153846	0.922835	0.68169	1.62158	0.68169	0.580503	Two_patches	Apple_juice	Sitter	['0-10', '10-20', '20-30', '30-40', '40-50', '50-60', '60-70', '70-80', '80-90', '90-100']	592	5888	0.100543	52.306	436.416	529.954	1.77256	1.31169	30	36	0.143651	0.039117
															1. 0. 1. 0. ]	0.01538462 0. 0.01538462 0. ]
exp3_larva_6	0.721277	0.801768	0.799712	0.868083			0.238716	0.141739	0.221957	0.13087					[0. 0.77777778 0.7 0.76923077 0. 0.	[0.03030303 0.27272727 0.3030303 0.39393939 0. 0.	0.551614	0.428294	0.813014	0.428294	0.681319	Two_patches	Apple_juice	Sitter	['0-10', '10-20', '20-30', '30-40', '40-50', '50-60', '60-70', '70-80', '80-90', '90-100']	1395	5915	0.235841		370.248	156.924	1.63604	1.72426	19	15	0.229777	0.238071
															0. 0. 0. 0. ]	0. 0. 0. 0. ]
exp3_larva_7	0.640503	0.717966	0.579162	0.725155	-0.04		0.263646	0.167519	0.304971	0.191396	11.8867	6.32732			[0. 0.5 0.54545455 0.8 0.8 1.	[0.02325581 0.09302326 0.51162791 0.23255814 0.11627907 0.02325581	0.7628	0.762267	0.989739	0.762267	0.71295	Two_patches	Apple_juice	Sitter	['0-10', '10-20', '20-30', '30-40', '40-50', '50-60', '60-70', '70-80', '80-90', '90-100']	1024	5884	0.174031	87.6628	456.371	212.108	1.65982	2.30233	27	17	0.173302	0.164543
															0. 0. 0. 0. ]	0. 0. 0. 0. ]
exp3_larva_8	0.542808	0.634346	0.459616	0.562328	-0.128205	-0.142857	0.365634	0.212896	0.492575	0.277242	13.2503	7.01936	14.1653	10.6449	[0.5 0.69230769 0.66666667 0.42857143 0.88888889 1.	[0.03278689 0.21311475 0.39344262 0.1147541 0.14754098 0.03278689	1.11953	1.15328	1.87111	1.15328	0.724761	Two_patches	Apple_juice	Sitter	['0-10', '10-20', '20-30', '30-40', '40-50', '50-60', '60-70', '70-80', '80-90', '90-100']	414	5973	0.0693119	71.759	729.074	385.44	1.69347	1.2623	39	23	0.0778471	0.0460802
															0.5 0. 1. 1. ]	0.03278689 0. 0.01639344 0.01639344]
exp3_larva_9	0.596392	0.671451	0.426632	0.49969	0.391304	0.513514	0.287827	0.151348	0.443492	0.194665	13.2757	5.20784	12.2021	6.84213	[0. 0.72727273 0.7 0.5 0.42857143 0.41666667	[0.01639344 0.18032787 0.16393443 0.16393443 0.1147541 0.19672131	0.781011	0.841913	1.93724	0.841913	0.543771	Two_patches	Apple_juice	Sitter	['0-10', '10-20', '20-30', '30-40', '40-50', '50-60', '60-70', '70-80', '80-90', '90-100']	519	5940	0.0873737	81.377	408.858	570.996	1.52174	1.55814	23	39	0.119195	0.0483755
															0.71428571 1. 0. 0. ]	0.1147541 0.04918033 0. 0. ]
MEAN	0.524458	0.625472	0.480832	0.576719	-0.0291538	0.0925745	0.388202	0.211269	0.479519	0.21831	11.3199	6.18715	12.4717	8.01052			1.2755	0.663904	1.87016	0.663904	0.812723					657.4	5198.5	0.121598	98.5185	717.608	218.642	2.10567	1.76667	46.1	18.3333	0.128473	0.0649208
STD	0.105905	0.095482	0.139669	0.127737	0.301974	0.358336	0.101288	0.0440147	0.145294	0.0446022	2.88929	1.52902	1.84854	3.196			0.524186	0.245855	1.1477	0.245855	0.133554					563.597	866.657	0.0940136	27.646	297.247	186.95	1.06066	1.02758	19.3535	11.9787	0.0990124	0.0906521
N samples	30	30	29	29	29	9	30	30	29	29	29	29	9	9			30	21	21	21	30					30	30	30	21	30	30	30	30	30	30	30	30

## Sheet: Two_Patches - Rover
Rover
ID	turning_rate_in	std_turning_rate_in	turning_rate_out	std_turning_rate_out	handedness_in	handedness_out	speed_in	std_speed_in	speed_out	std_speed_out	steps_in	std_steps_in	steps_out	std_steps_out	dist_turns_in	dist_turns_all	num_turns_min_in	std_num_turns_min_in	num_turns_min_out	std_num_turns_min_out	ratio_in_out	env	substrate	larva_type	dist_labels	frames_not_moving	recorded_frames	pause_proportion	dist_five_min	crawl_dist_inside	crawl_dist_outside	pause_duration_inside	pause_duration_outside	total_turns_inside	total_turns_outside	prop_pause_inside	prop_pause_outside
exp1_larva_0	0.38824	0.491958	0.36376	0.473785	0.269841	-0.235294	0.715321	0.315524	0.804226	0.306422	15.1456	8.78034	12.6738	6.08816	[0.33333333 0.46153846 0.65384615 0.82608696 0.71428571 0.90909091	[0.03092784 0.13402062 0.26804124 0.2371134 0.07216495 0.11340206	2.05063	1.16756	2.91018	1.16756	0.728879	Two_patches	Sucrose	Rover	['0-10', '10-20', '20-30', '30-40', '40-50', '50-60', '60-70', '70-80', '80-90', '90-100']	129	4415	0.0292186	187.72	1104.46	479.721	2.19298	1.33333	64	36	0.038844	0.00143781
															0.8 0.4 1. 1. ]	0.05154639 0.05154639 0.03092784 0.01030928]
exp1_larva_1	0.423042	0.54909	0.332689	0.454244	-0.307692	-0.0909091	0.619328	0.334324	0.780373	0.30903	14.034	8.31382	13.9784	9.24763	[0.5 0.625 0.75 0.66666667 1. 0.66666667	[0.04081633 0.16326531 0.16326531 0.18367347 0.02040816 0.06122449	1.71116	1.25404	3.16552	1.25404	0.68352	Two_patches	Sucrose	Rover	['0-10', '10-20', '20-30', '30-40', '40-50', '50-60', '60-70', '70-80', '80-90', '90-100']	104	2591	0.0401389	108.337	517.139	317.612	1.96	1	27	24	0.055336	0.00141878
															0.75 0.55555556 1. 1. ]	0.08163265 0.18367347 0.08163265 0.02040816]
exp1_larva_2	0.457229	0.535266	0.412726	0.500247	0.396226	0.4375	0.679235	0.299786	0.710522	0.254723	12.4552	9.65561	13.1394	6.65298	[0. 0.47368421 0.76923077 0.72222222 0.61538462 0.57142857	[0.00833333 0.15833333 0.21666667 0.15 0.10833333 0.11666667	2.46353	0.792471	2.77732	0.792471	0.482509	Two_patches	Sucrose	Rover	['0-10', '10-20', '20-30', '30-40', '40-50', '50-60', '60-70', '70-80', '80-90', '90-100']	81	5803	0.0139583	136.409	931.91	1052.99	1.33333	1.57143	57	68	0.0171429	0.0103125
															0.76923077 0.6 0.25 0.71428571]	0.10833333 0.04166667 0.03333333 0.05833333]
exp1_larva_3	0.482009	0.604132	0.386311	0.497977	0.590361	0.272727	0.565486	0.312747	0.701008	0.2552	10.9217	7.10619	11.936	7.00803	[0.4 0.61538462 0.73529412 0.66666667 0.6 0.66666667	[0.04545455 0.23636364 0.30909091 0.13636364 0.13636364 0.05454545	1.73935	0.969688	2.87336	0.969688	0.846075	Two_patches	Sucrose	Rover	['0-10', '10-20', '20-30', '30-40', '40-50', '50-60', '60-70', '70-80', '80-90', '90-100']	557	5847	0.0952625		1239.55	313.701	2.13462	1	85	26	0.112189	0.00189934
															0.6 1. 1. 0. ]	0.04545455 0.02727273 0.00909091 0. ]
exp1_larva_4	0.370913	0.472327	0.407281	0.525947	0.547619	0.314286	0.659869	0.27869	0.628351	0.276162	12.6349	6.1833	9.86154	9.84858	[0.85714286 0.45833333 0.6969697 0.73333333 0.65 0.76470588	[0.0546875 0.1875 0.2578125 0.1171875 0.15625 0.1328125 0.0546875	2.51527	1.12967	3.19174	1.12967	0.773187	Two_patches	Sucrose	Rover	['0-10', '10-20', '20-30', '30-40', '40-50', '50-60', '60-70', '70-80', '80-90', '90-100']	135	5736	0.0235356	142.07	1421.03	401.831	1.54795	1.83333	90	39	0.0254791	0.0140575
															0.85714286 1. 1. 0. ]	0.03125 0.0078125 0. ]
exp1_larva_5	0.31625	0.403315	0.348473	0.464259	0.779817	0.961538	0.722451	0.259757	0.712653	0.256114	12.2965	4.94355	10.7129	5.04388	[0.66666667 0.375 0.82142857 0.5 0.46153846 0.66666667	[0.01851852 0.14814815 0.17283951 0.17283951 0.08024691 0.12962963	3.12343	1.24638	3.4402	1.24638	0.695065	Two_patches	Sucrose	Rover	['0-10', '10-20', '20-30', '30-40', '40-50', '50-60', '60-70', '70-80', '80-90', '90-100']	118	5998	0.0196732	170.441	1471.27	643.526	2.11111	1.53333	109	54	0.0227872	0.0125614
															0.62068966 0.81818182 1. 0. ]	0.17901235 0.06790123 0.0308642 0. ]
exp1_larva_6	0.371428	0.496212	0.318737	0.456351	0.458333	0.64	0.720425	0.28322	0.780663	0.275912	11.5393	7.39943	14.1781	6.77832	[0.61538462 0.63333333 0.73076923 0.57142857 0.38461538 0.44444444	[0.08965517 0.20689655 0.17931034 0.04827586 0.08965517 0.06206897	2.83597	0.795602	2.67989	0.795602	0.67089	Two_patches	Sucrose	Rover	['0-10', '10-20', '20-30', '30-40', '40-50', '50-60', '60-70', '70-80', '80-90', '90-100']	88	5998	0.0146716	180.533	1422.84	764.659	1.825	1.36364	96	52	0.0181412	0.00759109
															0.47619048 0.66666667 0.90909091 1. ]	0.14482759 0.08275862 0.07586207 0.02068966]
exp1_larva_7	0.449007	0.558061	0.423514	0.557211	0	-0.2	0.651659	0.321257	0.788735	0.313733	12.8512	6.58334	13.0801	6.63526	[0.375 0.54166667 0.82352941 0.76470588 0.55555556 0.5	[0.06722689 0.20168067 0.28571429 0.14285714 0.07563025 0.06722689	2.35727	0.791017	3.61179	0.791017	0.75105	Two_patches	Sucrose	Rover	['0-10', '10-20', '20-30', '30-40', '40-50', '50-60', '60-70', '70-80', '80-90', '90-100']	207	5475	0.0378082		1273.34	533.974	1.98	1	83	39	0.0481518	0.00476695
															1. 0.4 0.71428571 0.5 ]	0.04201681 0.04201681 0.05882353 0.01680672]
exp1_larva_8	0.384652	0.52541	0.318461	0.420113	0.5	0.72	0.619867	0.290774	0.721465	0.261208	12.7741	5.938	13.552	7.2344	[1. 0.2 0.60869565 0.5 0.6 0.6	[0.00934579 0.14018692 0.21495327 0.1682243 0.09345794 0.09345794	1.70634	1.12885	2.94853	1.12885	0.63624	Two_patches	Sucrose	Rover	['0-10', '10-20', '20-30', '30-40', '40-50', '50-60', '60-70', '70-80', '80-90', '90-100']	285	5872	0.0485354	203.011	1077.64	758.259	1.89474	1.83333	71	53	0.0674518	0.014576
															0.55555556 0.42857143 0.77777778 0.6 ]	0.08411215 0.06542056 0.08411215 0.04672897]
exp1_larva_9	0.346983	0.445943	0.314221	0.426336	-0.012987	0.0638298	0.765869	0.281994	0.756748	0.263471	11.3976	7.63487	13.0357	5.00745	[0.4 0.41176471 0.68 0.625 0.55 0.375	[0.04504505 0.15315315 0.22522523 0.14414414 0.18018018 0.07207207	2.92935	0.669116	2.81737	0.669116	0.616535	Two_patches	Sucrose	Rover	['0-10', '10-20', '20-30', '30-40', '40-50', '50-60', '60-70', '70-80', '80-90', '90-100']	58	4947	0.0117243	220.164	1154.55	705.289	1.25	3.5	81	51	0.00983607	0.00949153
															0.6 0.4 0.57142857 0.66666667]	0.04504505 0.04504505 0.06306306 0.02702703]
exp2_larva_0	0.452201	0.544151			-0.701149		0.533012	0.225185			9.56842	3.99952			[0.63157895 0.61363636 0.62962963 1. 0. 0.	[0.19587629 0.45360825 0.27835052 0.07216495 0. 0.	2.6933				0.996772	Two_patches	Sucrose	Rover	['0-10', '10-20', '20-30', '30-40', '40-50', '50-60', '60-70', '70-80', '80-90', '90-100']	115	4027	0.0285572	137.407	1035.11	2.74688	1.94915		93	5	0.0286497	0
															0. 0. 0. 0. ]	0. 0. 0. 0. ]
exp2_larva_1	0.454106	0.549149	0.489533	0.637812	0.105263	0.272727	0.49879	0.222322	0.516564	0.276142	9.61606	5.95584	9.8306	6.27338	[0.71428571 0.5 0.6 1. 0.75 0.	[0.13461538 0.15384615 0.38461538 0.15384615 0.07692308 0.	2.25772	1.10887	1.6195	1.10887	0.56137	Two_patches	Sucrose	Rover	['0-10', '10-20', '20-30', '30-40', '40-50', '50-60', '60-70', '70-80', '80-90', '90-100']	227	3650	0.0621918	123.167	497.045	367.277	1.36111	2	41	25	0.0239141	0.0435527
															0.5 1. 0.5 0. ]	0.03846154 0.01923077 0.03846154 0. ]
exp2_larva_2	0.450198	0.564582	0.461504	0.636633	0.0461538		0.531278	0.255091	0.459554	0.253874	9.40495	4.64371			[0.5625 0.66666667 0.56 0.8125 0.5 0.75	[0.19047619 0.17857143 0.29761905 0.19047619 0.07142857 0.04761905	2.33278	1.31008	2.04497	1.31008	0.745356	Two_patches	Sucrose	Rover	['0-10', '10-20', '20-30', '30-40', '40-50', '50-60', '60-70', '70-80', '80-90', '90-100']	257	4253	0.0604279	155.81	811.528	213.692	1.77966	2.26866	69	20	0.033123	0.0512475
															1. 0. 1. 0. ]	0.01190476 0. 0.01190476 0. ]
exp2_larva_3	0.780866	0.854784	0.790997	0.883002			0.197614	0.0854237	0.192862	0.0867683					[1. 0.45454545 0.90909091 1. 0. 0.	[0.03846154 0.42307692 0.42307692 0.07692308 0.03846154 0.	0.471513	0.495798	0.564687	0.495798	0.837727	Two_patches	Sucrose	Rover	['0-10', '10-20', '20-30', '30-40', '40-50', '50-60', '60-70', '70-80', '80-90', '90-100']	2113	6070	0.348105		326.656	62.4874	3.30112	2.80833	19	8	0.349263	0.320647
															0. 0. 0. 0. ]	0. 0. 0. 0. ]
exp2_larva_4	0.463628	0.563785	0.37863	0.460636	-0.304348		0.507363	0.250181	0.564015	0.177704	9.17963	4.56303			[0.6 0.62962963 0.59090909 0.75 0.83333333 1.	[0.11494253 0.31034483 0.25287356 0.18390805 0.06896552 0.02298851	2.34096	0.682176	2.15093	0.682176	0.863318	Two_patches	Sucrose	Rover	['0-10', '10-20', '20-30', '30-40', '40-50', '50-60', '60-70', '70-80', '80-90', '90-100']	162	4002	0.0404798	144.905	834.613	150.592	1.98667	1.85714	73	16	0.0431259	0.00484894
															1. 0. 1. 0. ]	0.01149425 0.01149425 0.01149425 0.01149425]
MEAN	0.439383	0.543878	0.410488	0.528182	0.169103	0.286946	0.599171	0.267752	0.651267	0.254747	11.7014	6.55004	12.3617	6.89255			2.23524	0.967236	2.62829	0.967236	0.7259					309.067	4978.93	0.0582859	159.165	1007.91	451.224	1.90716	1.77875	70.5333	34.4	0.0595623	0.0332273
STD	0.102894	0.0970311	0.117613	0.118474	0.399853	0.368471	0.135336	0.0585216	0.163595	0.0565267	1.74904	1.63596	1.49421	1.43188			0.629979	0.249837	0.773651	0.249837	0.125044					496.694	1048.55	0.0804179	32.1714	342.383	283.916	0.472287	0.687495	24.6897	18.0067	0.0812539	0.0781676
N samples	15	15	14	14	14	11	15	15	14	14	14	14	11	11			15	14	14	14	15					15	15	15	12	15	15	15	14	15	15	15	15
ID	turning_rate_in	std_turning_rate_in	turning_rate_out	std_turning_rate_out	handedness_in	handedness_out	speed_in	std_speed_in	speed_out	std_speed_out	steps_in	std_steps_in	steps_out	std_steps_out	dist_turns_in	dist_turns_all	num_turns_min_in	std_num_turns_min_in	num_turns_min_out	std_num_turns_min_out	ratio_in_out	env	substrate	larva_type	dist_labels	frames_not_moving	recorded_frames	pause_proportion	dist_five_min	crawl_dist_inside	crawl_dist_outside	pause_duration_inside	pause_duration_outside	total_turns_inside	total_turns_outside	prop_pause_inside	prop_pause_outside
exp1_larva_0	0.546977	0.682734	0.483137	0.607773	0.277108		0.371477	0.205309	0.42781	0.207372	6.95956	5.07541			[0.625 0.51724138 0.7 0.71428571 0.4 0.81818182	[0.08421053 0.30526316 0.31578947 0.07368421 0.10526316 0.11578947	1.87256				0.938159	Two_patches	Yeast	Rover	['0-10', '10-20', '20-30', '30-40', '40-50', '50-60', '60-70', '70-80', '80-90', '90-100']	944	5789	0.163068	87.5811	838.238	69.5192	3.03667	1.65	88	8	0.167741	0.0579965
															0. 0. 0. 0. ]	0. 0. 0. 0. ]
exp1_larva_1	0.415246	0.509424	0.40934	0.514523	-0.682353		0.438032	0.186797	0.487148	0.206342	5.63055	2.78753			[0.56818182 0.60227273 0.65454545 0.66666667 0. 0.	[0.23157895 0.46315789 0.28947368 0.01578947 0. 0.	3.50153				0.9275	Two_patches	Yeast	Rover	['0-10', '10-20', '20-30', '30-40', '40-50', '50-60', '60-70', '70-80', '80-90', '90-100']	273	5931	0.0460293	106.503	1145.24	103.275	2.26271	1	171	20	0.0485366	0.012024
															0. 0. 0. 0. ]	0. 0. 0. 0. ]
exp1_larva_2	0.514271	0.663313	0.548851	0.738061	-0.433962		0.311627	0.190694	0.467076	0.18671	6.39261	4.03247			[0. 0.25 0.675 1. 0. 0. 0. 0. 0. 0. ]	[0.05172414 0.20689655 0.68965517 0.05172414 0. 0.	0.905135				0.991018	Two_patches	Yeast	Rover	['0-10', '10-20', '20-30', '30-40', '40-50', '50-60', '60-70', '70-80', '80-90', '90-100']	2747	5901	0.465514	101.29	482.242	12.144	5.65021	1	54	5	0.469562	0.00657895
																0. 0. 0. 0. ]
exp1_larva_4	0.506497	0.646666			0.466667		0.31676	0.200825			5.54809	3.12386			[0.27777778 0.57142857 0.7826087 0. 0. 0.	[0.18556701 0.57731959 0.2371134 0. 0. 0.	2.1388				1	Two_patches	Yeast	Rover	['0-10', '10-20', '20-30', '30-40', '40-50', '50-60', '60-70', '70-80', '80-90', '90-100']	1543	5573	0.276871		636.053	0	3.9768		94	4	0.276871	0
															0. 0. 0. 0. ]	0. 0. 0. 0. ]
exp1_larva_5	0.410714	0.51773	0.460202	0.581086	-0.296		0.439199	0.181519	0.412988	0.166099	6.98324	4.47841			[0.55172414 0.54385965 0.69767442 0.72 0. 0.	[0.18831169 0.37012987 0.27922078 0.16233766 0. 0.	3.05501				0.915669	Two_patches	Yeast	Rover	['0-10', '10-20', '20-30', '30-40', '40-50', '50-60', '60-70', '70-80', '80-90', '90-100']	222	5763	0.0385216	96.2019	1108.98	97.4652	1.83333	1.85714	133	22	0.0396058	0.0179806
															0. 0. 0. 0. ]	0. 0. 0. 0. ]
exp1_larva_6	0.570141	0.660817	0.460513	0.513842	-0.591837	-0.902439	0.352402	0.182882	0.478488	0.205456	4.0078	1.86407	4.25826	1.568	[0.5 0.36363636 0.53571429 0.64516129 0.66666667 0.	[0.03061224 0.2244898 0.57142857 0.15816327 0.01530612 0.	3.10379	0.548556	7.65823	0.548556	0.860237	Two_patches	Yeast	Rover	['0-10', '10-20', '20-30', '30-40', '40-50', '50-60', '60-70', '70-80', '80-90', '90-100']	529	5817	0.0909403		790.966	189.003	1.82671	1.35294	151	46	0.101119	0.0230924
															0. 0. 0. 0. ]	0. 0. 0. 0. ]
exp1_larva_7	0.540722	0.667325	0.557813	0.687892	-0.651163		0.339475	0.204801	0.315514	0.18784	5.25744	2.30076			[0.7826087 0.76 0.41860465 0.90909091 0. 0.	[0.2254902 0.24509804 0.42156863 0.10784314 0. 0.	1.94908				0.926381	Two_patches	Yeast	Rover	['0-10', '10-20', '20-30', '30-40', '40-50', '50-60', '60-70', '70-80', '80-90', '90-100']	1658	5610	0.295544	86.6427	609.866	55.5305	3.97264	1.79412	91	12	0.307293	0.0759651
															0. 0. 0. 0. ]	0. 0. 0. 0. ]
exp1_larva_8	0.563048	0.696917	0.52929	0.610447	0.217391		0.273108	0.176668	0.304347	0.117678	5.8843	3.60428			[0.5 0.87878788 1. 0. 0. 0.	[0.39285714 0.58928571 0.01785714 0. 0. 0.	0.998393	0.235294	2.05882	0.235294	0.955201	Two_patches	Yeast	Rover	['0-10', '10-20', '20-30', '30-40', '40-50', '50-60', '60-70', '70-80', '80-90', '90-100']	2016	5201	0.387618	81.0863	402.561	34.2391	4.50673	1.2	50	7	0.404589	0.00581395
															0. 0. 0. 0. ]	0. 0. 0. 0. ]
exp1_larva_9	0.583924	0.753342	0.438453	0.566018	-0.6		0.255997	0.181282	0.373682	0.154152	5.52384	2.76192			[0.57142857 0.52941176 0.66666667 0. 0. 0.	[0.17948718 0.43589744 0.38461538 0. 0. 0.	0.601581				0.968455	Two_patches	Yeast	Rover	['0-10', '10-20', '20-30', '30-40', '40-50', '50-60', '60-70', '70-80', '80-90', '90-100']	3410	5928	0.575236		299.004	33.4445	6.0444	1	35	5	0.592754	0.027027
															0. 0. 0. 0. ]	0. 0. 0. 0. ]
exp1_larva_10	0.449103	0.566167	0.509009	0.631728	0.010989		0.441527	0.209574	0.43477	0.20857	6.70005	4.54343			[0.42857143 0.47619048 0.60344828 0.71428571 0.6 1.	[0.05982906 0.17948718 0.4957265 0.11965812 0.12820513 0.01709402	2.88961	0.478681	5.35556	0.478681	0.897831	Two_patches	Yeast	Rover	['0-10', '10-20', '20-30', '30-40', '40-50', '50-60', '60-70', '70-80', '80-90', '90-100']	324	4610	0.070282	97.6948	844.2	98.9102	2.3876	1	96	22	0.0744141	0.00859753
															0. 0. 0. 0. ]	0. 0. 0. 0. ]
exp2_larva_0	0.551619	0.6927	0.423717	0.548058	-0.04	-0.157895	0.253107	0.139021	0.452456	0.191709	6.306	3.10807			[0.33333333 0.45454545 0.85714286 0.66666667 1. 0.33333333	[0.06 0.22 0.28 0.06 0.04 0.06 0.24 0.04 0. 0. ]	1.16492	0.739817	4.26567	0.739817	0.829519	Two_patches	Yeast	Rover	['0-10', '10-20', '20-30', '30-40', '40-50', '50-60', '60-70', '70-80', '80-90', '90-100']	775	3015	0.257048		219.824	112.209	3.17155	1	28	23	0.303079	0.00485853
															0.58333333 0.5 0. 0. ]
exp2_larva_1	0.645395	0.701352					0.356911	0.153131							[0. 0.4 0.61538462 1. 0. 0.	[0. 0.26315789 0.68421053 0.05263158 0. 0.	2.29568				1	Two_patches	Yeast	Rover	['0-10', '10-20', '20-30', '30-40', '40-50', '50-60', '60-70', '70-80', '80-90', '90-100']	32	840	0.0380952	104.267	143.835	0	1.77778		18	2	0.0380952	0
															0. 0. 0. 0. ]	0. 0. 0. 0. ]
exp2_larva_2	0.609988	0.70223	0.403108	0.523126	-0.483871		0.317361	0.137398	0.424477	0.15298	5.96998	2.98067			[0. 0.38461538 0.66666667 1. 0.75 0.	[0. 0.30952381 0.42857143 0.02380952 0.19047619 0.	2.30196	0.861905	2.22291	0.861905	0.802242	Two_patches	Yeast	Rover	['0-10', '10-20', '20-30', '30-40', '40-50', '50-60', '60-70', '70-80', '80-90', '90-100']	118	2230	0.0529148	76.2838	265.473	92.1116	1.68182	1.75	33	10	0.0620458	0.00166231
															0.5 0. 0. 0. ]	0.04761905 0. 0. 0. ]
exp2_larva_3	0.74049	0.850177	0.594467	0.673227	0.0344828		0.205449	0.125196	0.294185	0.121541	5.25149	4.20552			[1. 0.42857143 0.75 0. 1. 0.	[0.01851852 0.38888889 0.22222222 0.03703704 0.03703704 0.01851852	0.777066	0.941233	1.82881	0.941233	0.744669	Two_patches	Yeast	Rover	['0-10', '10-20', '20-30', '30-40', '40-50', '50-60', '60-70', '70-80', '80-90', '90-100']	1606	5487	0.292692	69.9507	264.105	191.515	3.51282	1.90385	34	21	0.36882	0.0517241
															0.5 0.57142857 1. 0. ]	0.11111111 0.12962963 0.01851852 0.01851852]
exp2_larva_4	0.500542	0.59838	0.507661	0.61241	0.321429	0.239437	0.404527	0.168775	0.471111	0.202322	6.30796	6.2543	7.08693	4.22943	[0.6 0.76 0.60714286 0.57692308 0.5 0.52380952	[0.03676471 0.18382353 0.20588235 0.19117647 0.05882353 0.15441176	2.21538	1.12625	3.566	1.12625	0.561784	Two_patches	Yeast	Rover	['0-10', '10-20', '20-30', '30-40', '40-50', '50-60', '60-70', '70-80', '80-90', '90-100']	228	5673	0.0401904	79.6592	605.981	574.52	2.37662	1.5	63	74	0.0574208	0.0159972
															0.5625 0.57142857 0. 0. ]	0.11764706 0.05147059 0. 0. ]
exp2_larva_5	0.550785	0.68227	0.518896	0.611605	-0.217391	-0.219512	0.304078	0.2105	0.493179	0.254094	6.38847	4.00732	4.75	3.00171	[0. 0.5 0.62068966 0.875 0.46153846 0.73913043	[0.04395604 0.15384615 0.31868132 0.08791209 0.14285714 0.25274725	1.36181	1.68305	4.98295	1.68305	0.776122	Two_patches	Yeast	Rover	['0-10', '10-20', '20-30', '30-40', '40-50', '50-60', '60-70', '70-80', '80-90', '90-100']	1261	5034	0.250497	75.6012	419.019	249.548	3.60377	2.80488	49	43	0.29332	0.0549451
															0. 0. 0. 0. ]	0. 0. 0. 0. ]
exp2_larva_6	0.587754	0.712875	0.516203	0.613512	-0.0566038		0.279757	0.143334	0.379959	0.221029	4.95503	3.73613			[0.4 0.54166667 0.66666667 0.75 0.4375 0.66666667	[0.06578947 0.31578947 0.31578947 0.05263158 0.21052632 0.03947368	1.70982	1.22711	2.86408	1.22711	0.888502	Two_patches	Yeast	Rover	['0-10', '10-20', '20-30', '30-40', '40-50', '50-60', '60-70', '70-80', '80-90', '90-100']	553	4305	0.128455		459.22	87.2005	2.23013	1.11111	60	17	0.139346	0.0091954
															0. 0. 0. 0. ]	0. 0. 0. 0. ]
exp2_larva_8	0.523104	0.638011	0.419587	0.548516	-0.0123457	0.1	0.386899	0.203188	0.544497	0.231185	5.58206	4.87144	6.49558	3.88552	[0.44444444 0.38709677 0.63888889 0.52941176 0.71428571 0.61111111	[0.06081081 0.20945946 0.24324324 0.11486486 0.09459459 0.12162162	2.18305	0.972329	4.47486	0.972329	0.691247	Two_patches	Yeast	Rover	['0-10', '10-20', '20-30', '30-40', '40-50', '50-60', '60-70', '70-80', '80-90', '90-100']	708	5804	0.121985	118.8	644.961	477.796	3.08257	1.2	84	65	0.167498	0.0181087
															0.75 0.66666667 0.33333333 0.57142857]	0.02702703 0.04054054 0.04054054 0.0472973 ]
exp2_larva_9	0.504517	0.634947	0.52516	0.59253	0.22314	-0.172414	0.419958	0.218861	0.488522	0.230022	5.76827	3.79134	3.60555	1.86049	[0. 0.44642857 0.75 0.57894737 0.71428571 1.	[0.05063291 0.35443038 0.37974684 0.12025316 0.08860759 0.00632911	2.63071	1.12531	5.79331	1.12531	0.891316	Two_patches	Yeast	Rover	['0-10', '10-20', '20-30', '30-40', '40-50', '50-60', '60-70', '70-80', '80-90', '90-100']	657	5769	0.113885	158.428	941.756	150.221	2.94521	1.2	127	32	0.125438	0.013986
															0. 0. 0. 0. ]	0. 0. 0. 0. ]
exp3_larva_0	0.628159	0.72464	0.590394	0.695167	0.407407		0.369031	0.211536	0.476246	0.263031	3.79556	3.30249			[0. 0.5 0.45454545 0.6875 0.5 1.	[0.02222222 0.22222222 0.24444444 0.35555556 0.04444444 0.02222222	1.83502	0.499433	4.19048	0.499433	0.765704	Two_patches	Yeast	Rover	['0-10', '10-20', '20-30', '30-40', '40-50', '50-60', '60-70', '70-80', '80-90', '90-100']	224	1592	0.140704	81.3683	183.593	87.3911	2.83117	1.5	28	18	0.178835	0.00125497
															0.66666667 0. 0. 0. ]	0.06666667 0.02222222 0. 0. ]
exp3_larva_1	0.424045	0.529744	0.467475	0.547793	0.430657	0.181818	0.451761	0.192717	0.489288	0.200455	5.57643	3.6046	4.15019	1.94881	[0.44444444 0.64705882 0.68888889 0.74193548 1. 0.	[0.10909091 0.41212121 0.27272727 0.18787879 0.01212121 0.00606061	3.56479	0.479995	5.04651	0.479995	0.918806	Two_patches	Yeast	Rover	['0-10', '10-20', '20-30', '30-40', '40-50', '50-60', '60-70', '70-80', '80-90', '90-100']	453	5259	0.086138	114.571	988.452	103.484	2.85987	1	142	24	0.0929222	0.00342466
															0. 0. 0. 0. ]	0. 0. 0. 0. ]
exp3_larva_2	0.433172	0.557327	0.319104	0.464743	0.114286		0.476096	0.22022	0.506175	0.17085	6.36642	4.41544			[0.375 0.61702128 0.59302326 0.8 0. 0.	[0.10062893 0.29559748 0.5408805 0.06289308 0. 0.	3.26969				0.965161	Two_patches	Yeast	Rover	['0-10', '10-20', '20-30', '30-40', '40-50', '50-60', '60-70', '70-80', '80-90', '90-100']	445	5511	0.0807476	116.269	1156.2	47.8335	2.77987	1	150	10	0.0830983	0.00440529
															0. 0. 0. 0. ]	0. 0. 0. 0. ]
exp3_larva_3	0.503143	0.6234	0.549545	0.661054	0.186813	0.371429	0.425783	0.220692	0.396396	0.219783	6.64142	4.23544	5.27524	3.96541	[0.47368421 0.5 0.70212766 0.56 0.69230769 0.	[0.13970588 0.23529412 0.34558824 0.18382353 0.09558824 0.	3.14742	1.59341	3.40584	1.59341	0.72737	Two_patches	Yeast	Rover	['0-10', '10-20', '20-30', '30-40', '40-50', '50-60', '60-70', '70-80', '80-90', '90-100']	505	5590	0.0903399	124.61	799.195	258.846	1.90132	2.57143	101	36	0.0710772	0.111686
															0. 0. 0. 0. ]	0. 0. 0. 0. ]
exp3_larva_4	0.473579	0.601866	0.41382	0.512485	0.376344	0.2	0.434743	0.212969	0.559781	0.221814	5.88696	4.74964	5.87763	3.41498	[0. 0.1875 0.6969697 0.55555556 0.6 0.25	[0. 0.11347518 0.23404255 0.12765957 0.07092199 0.08510638	2.82526	1.11779	4.33266	1.11779	0.710773	Two_patches	Yeast	Rover	['0-10', '10-20', '20-30', '30-40', '40-50', '50-60', '60-70', '70-80', '80-90', '90-100']	405	5328	0.0760135	131.731	745.15	417.316	2.40541	1.63333	93	58	0.0940058	0.0221419
															0.7 0.55555556 0.5 0.47368421]	0.07092199 0.06382979 0.09929078 0.13475177]
exp3_larva_5	0.438294	0.547049	0.547634	0.657951	-0.371429		0.405576	0.165476	0.38869	0.193694	6.23418	3.98659			[0.5 0.5 0.55769231 0.6 0.4 1.	[0.09917355 0.21487603 0.42975207 0.20661157 0.04132231 0.00826446	2.76882	0	4	0	0.920899	Two_patches	Yeast	Rover	['0-10', '10-20', '20-30', '30-40', '40-50', '50-60', '60-70', '70-80', '80-90', '90-100']	334	4981	0.0670548	123.86	863.675	74.2398	2.40299	1.09091	108	14	0.0701984	0.00849257
															0. 0. 0. 0. ]	0. 0. 0. 0. ]
exp3_larva_6	0.443763	0.561514	0.436912	0.557056	0.226415	0.134328	0.518066	0.223759	0.51126	0.215203	6.04023	3.4411	5.3691	3.49068	[0.41666667 0.5 0.5 0.625 0.5 0.5	[0.06666667 0.16666667 0.28888889 0.22222222 0.07777778 0.14444444	4.21837	0.909588	4.51956	0.909588	0.63541	Two_patches	Yeast	Rover	['0-10', '10-20', '20-30', '30-40', '40-50', '50-60', '60-70', '70-80', '80-90', '90-100']	108	4959	0.0217786	131.617	794.972	453.743	1.5098	1.29167	110	71	0.0244367	0.010881
															0.6 0. 0. 0. ]	0.02777778 0.00555556 0. 0. ]
exp3_larva_7	0.645069	0.771972	0.564182	0.691422	-0.128205		0.271472	0.149752	0.270765	0.1285	4.8894	2.51247			[0.4 0.5625 0.53333333 1. 0. 0.	[0.06024096 0.38554217 0.54216867 0.01204819 0. 0.	1.66888				0.982379	Two_patches	Yeast	Rover	['0-10', '10-20', '20-30', '30-40', '40-50', '50-60', '60-70', '70-80', '80-90', '90-100']	1991	5902	0.337343	74.8302	517.696	12.4552	4.48753	1.5	79	5	0.341325	0.0594059
															0. 0. 0. 0. ]	0. 0. 0. 0. ]
exp3_larva_8	0.408922	0.536336	0.380219	0.467979	0.409836	0.666667	0.551626	0.263929	0.578832	0.250676	6.48315	4.12058	5.20062	3.78874	[0.33333333 0.5 0.57894737 0.66666667 0.38888889 0.83333333	[0.04972376 0.29834254 0.4198895 0.09944751 0.09944751 0.03314917	3.81726	0.815121	4.78277	0.815121	0.830308	Two_patches	Yeast	Rover	['0-10', '10-20', '20-30', '30-40', '40-50', '50-60', '60-70', '70-80', '80-90', '90-100']	248	4903	0.0505813		1058.02	229.217	2.25532	2.25	138	44	0.0520757	0.0186625
															0. 0. 0. 0. ]	0. 0. 0. 0. ]
exp3_larva_9	0.470567	0.575442	0.51098	0.628768	0.0666667	0.25	0.399908	0.194713	0.41082	0.190978	7.52802	5.19139	6.69907	5.70271	[0.4 0.67857143 0.60784314 0.61111111 1. 1.	[0.09090909 0.25454545 0.46363636 0.16363636 0.01818182 0.00909091	2.29706	0.966408	2.4675	0.966408	0.821755	Two_patches	Yeast	Rover	['0-10', '10-20', '20-30', '30-40', '40-50', '50-60', '60-70', '70-80', '80-90', '90-100']	430	5470	0.0786106	89.8389	813.812	195.14	2.71812	1.5625	85	26	0.0901001	0.0166113
															0. 0. 0. 0. ]	0. 0. 0. 0. ]
MEAN	0.523571	0.641609	0.484655	0.594769	-0.0284117	0.0576182	0.371438	0.188811	0.438462	0.196299	5.8878	3.82452	5.34256	3.35059			2.31271	0.859015	4.09561	0.859015	0.856704					853.345	4957.76	0.163265	101.247	656.63	155.459	2.9666	1.47125	85.9655	25.6552	0.17709	0.0228455
STD	0.0811127	0.08211	0.0678571	0.0704203	0.356317	0.374248	0.0823187	0.0310631	0.0785884	0.0373108	0.822818	0.952809	1.06557	1.15481			0.93174	0.413835	1.40432	0.413835	0.113718					829.042	1313.43	0.140459	22.5741	297.925	149.445	1.11492	0.482214	42.025	20.5028	0.146802	0.0261339
N samples	29	29	27	27	28	12	29	29	27	27	28	28	11	11			29	19	19	19	29					29	29	29	23	29	29	29	27	29	29	29	29
ID	turning_rate_in	std_turning_rate_in	turning_rate_out	std_turning_rate_out	handedness_in	handedness_out	speed_in	std_speed_in	speed_out	std_speed_out	steps_in	std_steps_in	steps_out	std_steps_out	dist_turns_in	dist_turns_all	num_turns_min_in	std_num_turns_min_in	num_turns_min_out	std_num_turns_min_out	ratio_in_out	env	substrate	larva_type	dist_labels	frames_not_moving	recorded_frames	pause_proportion	dist_five_min	crawl_dist_inside	crawl_dist_outside	pause_duration_inside	pause_duration_outside	total_turns_inside	total_turns_outside	prop_pause_inside	prop_pause_outside
exp1_larva_0	0.516701	0.605855	0.559555	0.667677	0.71831		0.345512	0.180766	0.332132	0.168839	9.74238	4.27019			[0.33333333 0.58333333 0.72413793 1. 0. 0.	[0.11538462 0.46153846 0.37179487 0.05128205 0. 0.	1.59885	0	1	0	0.921742	Two_patches	Apple_juice	Rover	['0-10', '10-20', '20-30', '30-40', '40-50', '50-60', '60-70', '70-80', '80-90', '90-100']	568	5993	0.0947772	63.8208	860.497	73.4011	1.87197	1.28571	71	8	0.0979363	0.0567227
															0. 0. 0. 0. ]	0. 0. 0. 0. ]
exp1_larva_1	0.506386	0.609243	0.452037	0.527072	0.318182		0.39329	0.187581	0.457764	0.196515	11.3502	7.77238			[0.42857143 0.42857143 0.77777778 0.72222222 1. 0.	[0.1147541 0.2295082 0.29508197 0.29508197 0.06557377 0.	0.98541	0.508192	1.59322	0.508192	0.852671	Two_patches	Apple_juice	Rover	['0-10', '10-20', '20-30', '30-40', '40-50', '50-60', '60-70', '70-80', '80-90', '90-100']	895	5878	0.152263	91.7977	813.913	191.574	3.71368	1.52941	46	16	0.173384	0.0263158
															0. 0. 0. 0. ]	0. 0. 0. 0. ]
exp1_larva_2	0.463248	0.55387	0.366323	0.440898	0.8125	0.960784	0.427281	0.189953	0.517701	0.1769	8.57504	4.02964	9.48683	4.02297	[0.55555556 0.5 0.4 0.66666667 0.22222222 0.5	[0.07563025 0.06722689 0.04201681 0.05042017 0.1512605 0.21848739	2.13935	0.680737	2.4302	0.680737	0.59505	Two_patches	Apple_juice	Rover	['0-10', '10-20', '20-30', '30-40', '40-50', '50-60', '60-70', '70-80', '80-90', '90-100']	259	5818	0.044517	86.6715	699.672	590.18	1.57759	2.30303	66	54	0.0528596	0.0299448
															0.62962963 0.64285714 1. 1. ]	0.22689076 0.11764706 0.03361345 0.01680672]
exp1_larva_3	0.521214	0.613526	0.538845	0.649412	0.277778		0.367382	0.180423	0.361954	0.209205	13.3006	7.46164			[0.33333333 0.66666667 0.63157895 1. 1. 0.	[0.05660377 0.22641509 0.35849057 0.30188679 0.05660377 0.	1.28125	0.686722	0.330091	0.686722	0.581211	Two_patches	Apple_juice	Rover	['0-10', '10-20', '20-30', '30-40', '40-50', '50-60', '60-70', '70-80', '80-90', '90-100']	1347	5929	0.227188		582.668	254.273	1.47541	6.60736	37	17	0.0783517	0.421691
															0. 0. 0. 0. ]	0. 0. 0. 0. ]
exp1_larva_4	0.693641	0.791554	0.69309	0.813077	0.2		0.256909	0.157107	0.228298	0.128837	8.58505	4.74951			[0.5 0.68421053 0.7 1. 0. 0.	[0.21052632 0.5 0.26315789 0.02631579 0. 0.	0.738916	0.495273	0.284785	0.495273	0.78813	Two_patches	Apple_juice	Rover	['0-10', '10-20', '20-30', '30-40', '40-50', '50-60', '60-70', '70-80', '80-90', '90-100']	1550	5914	0.26209	78.6581	460.895	88.1231	2.14659	3.51095	31	8	0.22935	0.359223
															0. 0. 0. 0. ]	0. 0. 0. 0. ]
exp1_larva_5	0.507487	0.621621	0.405396	0.506336	0.529412	-0.047619	0.393055	0.214682	0.539412	0.225261	12.3303	6.29319	14.4357	9.13046	[0.5 0.70833333 0.8 0.9375 0.6 0.8	[0.05405405 0.32432432 0.27027027 0.21621622 0.06756757 0.06756757	1.25479	0.580936	1.66038	0.580936	0.772171	Two_patches	Apple_juice	Rover	['0-10', '10-20', '20-30', '30-40', '40-50', '50-60', '60-70', '70-80', '80-90', '90-100']	563	5886	0.0956507	59.7402	786.502	354.394	1.9963	1.33333	51	24	0.118592	0.0164948
															0. 0. 0. 0. ]	0. 0. 0. 0. ]
exp1_larva_6	0.588371	0.724401	0.522656	0.626791	0.315789		0.304273	0.184359	0.489995	0.257764	11.1194	4.30425			[0.33333333 0.5625 0.53846154 0.8 1. 0.	[0.16071429 0.28571429 0.23214286 0.26785714 0.05357143 0.	0.71711	1.26523	2.19588	1.26523	0.86652	Two_patches	Apple_juice	Rover	['0-10', '10-20', '20-30', '30-40', '40-50', '50-60', '60-70', '70-80', '80-90', '90-100']	1244	5926	0.209922		595.766	186.198	2.26493	1.30435	35	22	0.236417	0.0346821
															0. 0. 0. 0. ]	0. 0. 0. 0. ]
exp1_larva_7	0.466936	0.552953	0.425394	0.480148	0.68932	0.787234	0.471004	0.246488	0.568658	0.242077	7.45193	3.09151	7.56741	2.962	[0.6 0.54545455 0.34482759 0.58823529 0.35135135 0.78125	[0.03289474 0.07236842 0.19078947 0.22368421 0.24342105 0.21052632	2.7767	1.2513	4.70526	1.2513	0.761491	Two_patches	Apple_juice	Rover	['0-10', '10-20', '20-30', '30-40', '40-50', '50-60', '60-70', '70-80', '80-90', '90-100']	283	5983	0.0473007	68.0946	1013.36	396.639	1.75524	1.3913	105	48	0.0550922	0.0221607
															0.75 0. 0. 0. ]	0.02631579 0. 0. 0. ]
exp1_larva_8	0.525471	0.590224	0.437584	0.507969	0.0204082	0.3	0.365305	0.177905	0.481997	0.213	11.4892	7.75872			[0.66666667 0.46153846 0.52 0.66666667 0.625 0.	[0.08450704 0.18309859 0.35211268 0.21126761 0.11267606 0.	1.20782	1.42321	1.66427	1.42321	0.754743	Two_patches	Apple_juice	Rover	['0-10', '10-20', '20-30', '30-40', '40-50', '50-60', '60-70', '70-80', '80-90', '90-100']	443	5904	0.0750339	78.9069	739.559	338.603	2.0201	1.36667	50	23	0.0902154	0.0265544
															0.5 1. 0. 0. ]	0.02816901 0.01408451 0. 0.01408451]
exp1_larva_9	0.589393	0.701545	0.593335	0.842725			0.306705	0.186294	0.222799	0.161216					[0.33333333 0.83333333 0.5 0.77777778 0. 0.	[0.13043478 0.26086957 0.17391304 0.39130435 0.04347826 0.	0.583279	0.291358	0.093662	0.291358	0.393032	Two_patches	Apple_juice	Rover	['0-10', '10-20', '20-30', '30-40', '40-50', '50-60', '60-70', '70-80', '80-90', '90-100']	2687	5712	0.470413		272.2	138.358	2.26214	6.29178	14	10	0.207572	0.591478
															0. 0. 0. 0. ]	0. 0. 0. 0. ]
exp2_larva_0	0.419664	0.549319	0.34966	0.472414	0.435897	0.47619	0.527398	0.296938	0.708391	0.285457	14.4866	7.5258	12.0058	6.82106	[0.57142857 0.85714286 0.82352941 0.83333333 0.7 1.	[0.08860759 0.17721519 0.21518987 0.07594937 0.12658228 0.03797468	1.43089	0.982159	3.33156	0.982159	0.595532	Two_patches	Apple_juice	Rover	['0-10', '10-20', '20-30', '30-40', '40-50', '50-60', '60-70', '70-80', '80-90', '90-100']	376	4700	0.08	146.311	661.356	640.031	2.6729	2.8125	39	49	0.102179	0.0281162
															0.4 0.85714286 0.33333333 0.75 ]	0.06329114 0.08860759 0.07594937 0.05063291]
exp2_larva_1	0.352581	0.475713	0.326743	0.446272	-0.619048	-0.72	0.655317	0.305827	0.732985	0.293217	14.9883	7.52976	15.2069	7.90928	[0. 0. 0.66666667 0.5 0.25 0.7	[0. 0.01219512 0.14634146 0.07317073 0.09756098 0.12195122	1.55568	0.959848	2.17295	0.959848	0.504983	Two_patches	Apple_juice	Rover	['0-10', '10-20', '20-30', '30-40', '40-50', '50-60', '60-70', '70-80', '80-90', '90-100']	367	4917	0.074639	130.374	732.972	845.498	3.38889	3.61765	43	53	0.0982682	0.034973
															0.5 0.4 0.66666667 0.625 ]	0.12195122 0.18292683 0.14634146 0.09756098]
exp2_larva_2	0.51552	0.633785	0.510079	0.628042	0.216216		0.461477	0.284878	0.578182	0.327195	12.1308	6.31867			[0. 0.6 0.76666667 0.91666667 0. 0.	[0.09411765 0.41176471 0.35294118 0.14117647 0. 0.	1.67677				0.96469	Two_patches	Apple_juice	Rover	['0-10', '10-20', '20-30', '30-40', '40-50', '50-60', '60-70', '70-80', '80-90', '90-100']	587	5834	0.100617	105.667	1160.61	58.1073	2.39506	1	76	10	0.103412	0.0134409
															0. 0. 0. 0. ]	0. 0. 0. 0. ]
exp2_larva_3	0.569148	0.659679	0.559733	0.651457	-0.294118	-0.130435	0.431035	0.284255	0.569752	0.308493	9.14552	4.82717	9.76281	5.55759	[0.28571429 0.40909091 0.71428571 0.64285714 0.14285714 0.57142857	[0.07216495 0.22680412 0.21649485 0.1443299 0.07216495 0.1443299	1.86794	1.16184	2.79339	1.16184	0.842673	Two_patches	Apple_juice	Rover	['0-10', '10-20', '20-30', '30-40', '40-50', '50-60', '60-70', '70-80', '80-90', '90-100']	564	5657	0.0996995		911.208	243.569	2.02672	2.2	71	27	0.111391	0.026764
															0.85714286 1. 0.66666667 0. ]	0.07216495 0.02061856 0.03092784 0. ]
exp2_larva_4	0.509145	0.627643	0.508691	0.623188	0.257143		0.44618	0.275287	0.580757	0.307624	11.1053	7.88253			[0.57142857 0.33333333 0.625 0.89473684 0.5 1.	[0.08333333 0.17857143 0.47619048 0.22619048 0.02380952 0.01190476	1.54983				0.932244	Two_patches	Apple_juice	Rover	['0-10', '10-20', '20-30', '30-40', '40-50', '50-60', '60-70', '70-80', '80-90', '90-100']	676	5815	0.116251	113.87	1056.78	112.667	2.50373	1	74	11	0.123778	0.00863558
															0. 0. 0. 0. ]	0. 0. 0. 0. ]
exp2_larva_5	0.488304	0.609351	0.437115	0.570708	-0.148148	-0.6	0.491703	0.318758	0.697881	0.396606	11.588	8.68863	11.3634	7.00474	[0. 0.33333333 0.72222222 0.92 1. 0.5	[0. 0.13636364 0.40909091 0.28409091 0.01136364 0.02272727	1.49105	1.87951	3.73223	1.87951	0.804735	Two_patches	Apple_juice	Rover	['0-10', '10-20', '20-30', '30-40', '40-50', '50-60', '60-70', '70-80', '80-90', '90-100']	605	5787	0.104545	100.219	1008.48	371.621	2.25311	1.9375	54	35	0.116599	0.0461653
															0. 0.57142857 1. 0. ]	0.01136364 0.07954545 0.04545455 0. ]
exp2_larva_6	0.587186	0.707976	0.472765	0.644203	-0.285714	-0.473684	0.375575	0.263316	0.620822	0.338565	7.91606	6.59872			[0.75 0.61111111 0.57575758 0.85714286 1. 0.	[0.1 0.225 0.4125 0.175 0.0375 0.0125 0.025 0.0125 0. 0. ]	1.40127	0.330719	2.125	0.330719	0.862595	Two_patches	Apple_juice	Rover	['0-10', '10-20', '20-30', '30-40', '40-50', '50-60', '60-70', '70-80', '80-90', '90-100']	925	5764	0.160479	55.4293	769.178	227.531	2.4548	1.93103	58	23	0.174779	0.0544747
															1. 1. 0. 0. ]
exp2_larva_7	0.424045	0.531132	0.322573	0.468006	0	-0.435897	0.524101	0.316007	0.814251	0.346963	13.3565	6.72016	13.3428	9.3779	[0.81818182 0.78947368 0.89285714 0.63636364 0.5 0.25	[0.11340206 0.19587629 0.28865979 0.11340206 0.08247423 0.04123711	1.53535	0.926986	2.59972	0.926986	0.689946	Two_patches	Apple_juice	Rover	['0-10', '10-20', '20-30', '30-40', '40-50', '50-60', '60-70', '70-80', '80-90', '90-100']	486	5928	0.0819838	179.978	972.207	701.884	2.44156	3.54839	57	42	0.0919315	0.0575916
															0.5 1. 0.4 1. ]	0.04123711 0.05154639 0.05154639 0.02061856]
exp2_larva_8	0.426483	0.552943	0.509166	0.615607	-0.311475	-0.047619	0.534401	0.303646	0.62096	0.315344	14.4292	8.78031	10.3695	8.3686	[0.375 0.55555556 0.82 0.92307692 0. 0.	[0.0952381 0.10714286 0.5952381 0.1547619 0. 0.01190476	1.3414	0.565821	2.46429	0.565821	0.865687	Two_patches	Apple_juice	Rover	['0-10', '10-20', '20-30', '30-40', '40-50', '50-60', '60-70', '70-80', '80-90', '90-100']	642	5919	0.108464	162.176	1206.94	233.481	3.57738	3.41667	62	23	0.117291	0.0468037
															1. 0.5 0. 0. ]	0.01190476 0.02380952 0. 0. ]
exp2_larva_9	0.386975	0.497288	0.397555	0.560057	0.0746269		0.575798	0.306051	0.624253	0.319904	14.0518	8.00325			[0.75 0.25 0.81818182 0.9375 1. 0.	[0.04651163 0.23255814 0.38372093 0.18604651 0.03488372 0.01162791	1.82419	0.46577	1.68182	0.46577	0.862486	Two_patches	Apple_juice	Rover	['0-10', '10-20', '20-30', '30-40', '40-50', '50-60', '60-70', '70-80', '80-90', '90-100']	339	5534	0.0612577	160.403	1286.91	220.986	2.07914	1.42857	72	18	0.0605489	0.0407498
															0.5 0. 0.66666667 0.5 ]	0.02325581 0.02325581 0.03488372 0.02325581]
exp3_larva_0	0.459294	0.565434	0.479422	0.574784	0.61194	0.513514	0.494807	0.257094	0.560925	0.270337	11.6372	5.30476	10.6514	5.72555	[0.6 0.41176471 0.8 0.64285714 0.42857143 0.5	[0.04716981 0.16037736 0.23584906 0.13207547 0.06603774 0.09433962	1.68385	0.935624	2.29446	0.935624	0.73064	Two_patches	Apple_juice	Rover	['0-10', '10-20', '20-30', '30-40', '40-50', '50-60', '60-70', '70-80', '80-90', '90-100']	219	5940	0.0368687	129.517	1032.42	432.753	1.33884	1.58333	67	40	0.0373272	0.0343373
															0.54545455 0.83333333 1. 0. ]	0.10377358 0.11320755 0.04716981 0. ]
exp3_larva_1	0.449969	0.548746	0.38884	0.516989	0.436893		0.492919	0.244327	0.592966	0.237207	10.7141	4.56916			[0.44444444 0.47368421 0.78 0.94444444 0. 0.	[0.07826087 0.33043478 0.43478261 0.15652174 0. 0.	2.15933				0.943214	Two_patches	Apple_juice	Rover	['0-10', '10-20', '20-30', '30-40', '40-50', '50-60', '60-70', '70-80', '80-90', '90-100']	199	5917	0.0336319	165.471	1324.72	98.7288	1.49242	1	104	12	0.0352983	0.00477327
															0. 0. 0. 0. ]	0. 0. 0. 0. ]
exp3_larva_2	0.431077	0.516576	0.402943	0.499716	0.587302	-0.04	0.452726	0.2358	0.537583	0.269481	12.4122	6.82387	13.273	6.92227	[0.83333333 0.6 0.73076923 0.8 0.55555556 1.	[0.06741573 0.28089888 0.29213483 0.2247191 0.1011236 0.02247191	1.90157	0.783102	2.02166	0.783102	0.734218	Two_patches	Apple_juice	Rover	['0-10', '10-20', '20-30', '30-40', '40-50', '50-60', '60-70', '70-80', '80-90', '90-100']	268	5956	0.0449966	130.827	944.612	405.606	1.42029	1.35849	63	27	0.0448205	0.0442532
															1. 0. 0. 0. ]	0.01123596 0. 0. 0. ]
exp3_larva_3	0.452033	0.538022	0.60039	0.679701	-0.193548		0.460177	0.2372	0.485604	0.258214	13.0174	8.53582			[0.6 0.48148148 0.71428571 0.91666667 0. 0.	[0.05952381 0.32142857 0.33333333 0.28571429 0. 0.	1.50823	0.497843	2.45361	0.497843	0.849606	Two_patches	Apple_juice	Rover	['0-10', '10-20', '20-30', '30-40', '40-50', '50-60', '60-70', '70-80', '80-90', '90-100']	203	5971	0.0339977	106.914	1126.51	210.995	1.392	1.26087	63	22	0.0342992	0.0312837
															0. 0. 0. 0. ]	0. 0. 0. 0. ]
exp3_larva_4	0.42783	0.536915	0.427298	0.530802	0.2	0.433962	0.43379	0.212643	0.525469	0.285628	11.3054	5.78033	12.921	5.13235	[0.5 0.76470588 0.33333333 0.51515152 0.72222222 1.	[0.06315789 0.17894737 0.15789474 0.34736842 0.18947368 0.06315789	1.87099	0.998215	2.25972	0.998215	0.50499	Two_patches	Apple_juice	Rover	['0-10', '10-20', '20-30', '30-40', '40-50', '50-60', '60-70', '70-80', '80-90', '90-100']	229	5812	0.0394012	103.81	612.512	723.571	1.63636	1.63514	41	55	0.0367973	0.039478
															0. 0. 0. 0. ]	0. 0. 0. 0. ]
exp3_larva_5	0.470391	0.562472	0.452649	0.558214	-0.107143	-0.047619	0.476279	0.258534	0.522747	0.26656	14.0006	10.0014	12.6553	6.51425	[0.375 0.42857143 0.90322581 0.875 1. 0.	[0.10126582 0.26582278 0.39240506 0.20253165 0.03797468 0.	1.30271	0.474664	2.34286	0.474664	0.84554	Two_patches	Apple_juice	Rover	['0-10', '10-20', '20-30', '30-40', '40-50', '50-60', '60-70', '70-80', '80-90', '90-100']	200	5885	0.0339847	88.4186	1138.55	234.713	1.46512	1.1	58	22	0.0379823	0.0107422
															0. 0. 0. 0. ]	0. 0. 0. 0. ]
exp3_larva_6	0.479981	0.568413	0.455491	0.5575	0.0140845		0.432712	0.23388	0.586731	0.287567	11.6498	6.37906			[0.5 0.45833333 0.775 0.92857143 0.66666667 0.	[0.06818182 0.27272727 0.45454545 0.15909091 0.03409091 0.	1.5227	0.486986	2.05333	0.486986	0.910729	Two_patches	Apple_juice	Rover	['0-10', '10-20', '20-30', '30-40', '40-50', '50-60', '60-70', '70-80', '80-90', '90-100']	302	5881	0.0513518	138.817	1093.46	151.67	1.65363	3	73	16	0.0552651	0.00931677
															0. 0. 1. 0. ]	0. 0. 0.01136364 0. ]
exp3_larva_7	0.407937	0.504586	0.439542	0.529687	0.155556	0.24	0.464236	0.222911	0.587004	0.294225	13.3174	7.6908	10.3429	6.88035	[0.25 0.25 0.6 0.47826087 0.36363636 0.9	[0.04081633 0.12244898 0.20408163 0.23469388 0.2244898 0.10204082	1.58065	0.986541	2.74126	0.986541	0.561858	Two_patches	Apple_juice	Rover	['0-10', '10-20', '20-30', '30-40', '40-50', '50-60', '60-70', '70-80', '80-90', '90-100']	303	5941	0.0510015	89.1177	723.512	737.276	2.23711	1.53571	44	55	0.065009	0.0323065
															0.8 1. 1. 0. ]	0.05102041 0.01020408 0.01020408 0. ]
exp3_larva_8	0.535354	0.624894	0.552357	0.626265	0.657895		0.393837	0.225582	0.391032	0.244956	8.10379	4.40645			[0.4 0.4 0.58974359 0.70833333 0.8 1.	[0.05319149 0.21276596 0.41489362 0.25531915 0.05319149 0.0106383	2.0223	0.599961	1.07597	0.599961	0.779426	Two_patches	Apple_juice	Rover	['0-10', '10-20', '20-30', '30-40', '40-50', '50-60', '60-70', '70-80', '80-90', '90-100']	437	5998	0.0728576	86.7577	854.036	239.116	1.45259	1.35135	76	19	0.0720856	0.0754717
															0. 0. 0. 0. ]	0. 0. 0. 0. ]
exp3_larva_9	0.468615	0.552508	0.535778	0.620176	0.208333	0.135135	0.465097	0.227597	0.508099	0.286544	11.2156	6.74208	12.6732	8.28154	[0.5 0.6 0.66666667 0.71428571 0.71428571 0.8	[0.08988764 0.2247191 0.30337079 0.23595506 0.07865169 0.05617978	1.73033	1.22358	1.51035	1.22358	0.608711	Two_patches	Apple_juice	Rover	['0-10', '10-20', '20-30', '30-40', '40-50', '50-60', '60-70', '70-80', '80-90', '90-100']	247	5786	0.0426892	118.434	795.548	534.266	1.29577	1.96203	50	40	0.0261215	0.0625504
															0. 0. 1. 0. ]	0. 0. 0.01123596 0. ]
MEAN	0.488013	0.59094	0.470767	0.581196	0.199255	0.0767027	0.440676	0.240536	0.534903	0.26399	11.535	6.51172	11.7372	6.70739			1.54135	0.794153	2.0597	0.794153	0.756042					600.433	5796.17	0.103596	109.239	874.585	334.527	2.07538	2.18677	58.3667	27.6333	0.0961651	0.0762499
STD	0.0698312	0.0709337	0.0850672	0.0945095	0.351221	0.460541	0.0820458	0.0467411	0.130397	0.059517	2.06924	1.6812	1.98213	1.7493			0.445177	0.400212	0.989815	0.400212	0.14728					518.379	284.168	0.0894579	34.2547	244.217	218.831	0.63246	1.39255	19.3554	15.18	0.0572397	0.131855
N samples	30	30	30	30	29	17	30	30	30	30	29	29	15	15			30	27	27	27	30					30	30	30	26	30	30	30	30	30	30	30	30

## Sheet: Two_Patches - Anosmic
Anosmic
ID	turning_rate_in	std_turning_rate_in	turning_rate_out	std_turning_rate_out	handedness_in	handedness_out	speed_in	std_speed_in	speed_out	std_speed_out	steps_in	std_steps_in	steps_out	std_steps_out	dist_turns_in	dist_turns_all	num_turns_min_in	std_num_turns_min_in	num_turns_min_out	std_num_turns_min_out	ratio_in_out	env	substrate	larva_type	dist_labels	frames_not_moving	recorded_frames	pause_proportion	dist_five_min	crawl_dist_inside	crawl_dist_outside	pause_duration_inside	pause_duration_outside	total_turns_inside	total_turns_outside	prop_pause_inside	prop_pause_outside
exp1_larva_0	0.499011	0.674976	0.331718	0.443813	0.45098	0.39726	0.499694	0.370411	0.809668	0.321946	10.086	4.54886	11.3757	5.58162	[0. 0. 0.5 1. 0.2 0.5	[0. 0.00847458 0.06779661 0.02542373 0.08474576 0.16949153	1.53221	0.928523	3.86126	0.928523	0.591364	Two_patches	Sucrose	Anosmic	['0-10', '10-20', '20-30', '30-40', '40-50', '50-60', '60-70', '70-80', '80-90', '90-100']	916	5998	0.152718	120.925	673.837	965.124	2.63665	2.91304	51	75	0.239357	0.0273135
															0.54545455 0.63636364 0.4 0.61111111]	0.18644068 0.09322034 0.21186441 0.15254237]
exp1_larva_1	0.578686	0.606072	0.52189	0.568667	-0.785714	-0.471264	0.426931	0.197089	0.494955	0.171346	7.63725	2.63893	6.49519	2.41769	[0. 0.5 0.79166667 0.6 0.16666667 0.3902439	[0.02068966 0.22068966 0.16551724 0.03448276 0.04137931 0.28275862	2.38607	1.06288	3.36643	1.06288	0.465848	Two_patches	Sucrose	Anosmic	['0-10', '10-20', '20-30', '30-40', '40-50', '50-60', '60-70', '70-80', '80-90', '90-100']	240	5944	0.0403769	130.706	552.236	770.398	1.64545	1.96667	56	90	0.0653666	0.0182606
															0.68 0.55555556 0. 0. ]	0.17241379 0.06206897 0. 0. ]
exp1_larva_2	0.527485	0.656171	0.531855	0.638006	0.04		0.420616	0.277384	0.659321	0.289283	8.03508	4.44805			[0.5 0.42857143 0.83333333 0.66666667 0.4 0.1	[0.03225806 0.11290323 0.09677419 0.0483871 0.08064516 0.16129032	0.840443				0.958205	Two_patches	Sucrose	Anosmic	['0-10', '10-20', '20-30', '30-40', '40-50', '50-60', '60-70', '70-80', '80-90', '90-100']	2563	5862	0.437223		641.86	79.7778	6.58098	1	52	11	0.455759	0.0078329
															0.88888889 0.38461538 0.75 1. ]	0.14516129 0.20967742 0.06451613 0.0483871 ]
exp1_larva_3	0.54018	0.674016	0.361585	0.464111	0.444444	0.259259	0.438094	0.306623	0.721552	0.304874	12.1256	5.55564	11.6649	7.93286	[0.8 0.4 1. 0.4 0.38461538 0.53333333	[0.05681818 0.17045455 0.09090909 0.05681818 0.14772727 0.17045455	0.869976	1.18889	3.36904	1.18889	0.642093	Two_patches	Sucrose	Anosmic	['0-10', '10-20', '20-30', '30-40', '40-50', '50-60', '60-70', '70-80', '80-90', '90-100']	1131	5887	0.192118		587.922	745.724	3.4232	1.34483	36	57	0.288889	0.0175676
															0.54545455 0.5 0.57142857 1. ]	0.125 0.06818182 0.07954545 0.03409091]
exp1_larva_4	0.548154	0.652237	0.476406	0.616282	0.0384615	-0.0769231	0.487989	0.285811	0.590584	0.357898	9.91738	5.86753	13.7073	11.6693	[0.6 0.66666667 0.69565217 0.71428571 0.83333333 0.5	[0.17647059 0.21176471 0.27058824 0.08235294 0.07058824 0.02352941	1.6708	1.86404	1.90706	1.86404	0.639531	Two_patches	Sucrose	Anosmic	['0-10', '10-20', '20-30', '30-40', '40-50', '50-60', '60-70', '70-80', '80-90', '90-100']	687	5454	0.125963	112.276	761.507	482.507	1.97802	3.05607	53	33	0.103211	0.130175
															0.28571429 0.66666667 0.33333333 1. ]	0.08235294 0.03529412 0.03529412 0.01176471]
exp1_larva_5	0.602093	0.722984	0.454449	0.554231	-0.567568	-0.6	0.362166	0.241639	0.540919	0.261563	10.2478	6.10782			[0.375 0.64285714 0.75 0.77777778 1. 0.	[0.12903226 0.22580645 0.38709677 0.14516129 0.11290323 0.	0.834104	0.994915	2.75419	0.994915	0.809299	Two_patches	Sucrose	Anosmic	['0-10', '10-20', '20-30', '30-40', '40-50', '50-60', '60-70', '70-80', '80-90', '90-100']	1413	5721	0.246985		603.55	261.534	3.14842	2.01695	39	24	0.279482	0.0868613
															0. 0. 0. 0. ]	0. 0. 0. 0. ]
exp1_larva_6	0.547638	0.676868	0.47436	0.614149	-0.272727	-0.586207	0.427394	0.273814	0.461622	0.282744	10.6932	8.16781	11.6703	9.69969	[0. 0. 0.2 0. 0.66666667 0.5	[0. 0. 0.12195122 0.07317073 0.2195122 0.09756098	0.533601	1.02913	0.959973	1.02913	0.45287	Two_patches	Sucrose	Anosmic	['0-10', '10-20', '20-30', '30-40', '40-50', '50-60', '60-70', '70-80', '80-90', '90-100']	699	4774	0.146418	121.122	391.707	517.017	1.7967	1.69863	22	31	0.151249	0.0969255
															0.45454545 0.83333333 0. 0.5 ]	0.26829268 0.14634146 0.02439024 0.04878049]
exp1_larva_7	0.666137	0.812376	0.646816	0.743768			0.253661	0.183053	0.276264	0.184281					[0.66666667 0.42857143 1. 0. 0. 0.	[0.13636364 0.63636364 0.22727273 0. 0. 0.	0.174863	0.411974	0.216667	0.411974	0.739331	Two_patches	Sucrose	Anosmic	['0-10', '10-20', '20-30', '30-40', '40-50', '50-60', '60-70', '70-80', '80-90', '90-100']	3079	5647	0.545245		219.543	113.959	5.81384	4.12179	15	8	0.583473	0.352329
															0. 0. 0. 0. ]	0. 0. 0. 0. ]
exp1_larva_8	0.457515	0.551993	0.392334	0.552313	0.0212766	-0.384615	0.634263	0.293496	0.660387	0.293283	9.7484	10.0794	15.131	7.21597	[0.25 0.6 0.75 0.42857143 0.375 0.66666667	[0.03478261 0.17391304 0.10434783 0.06086957 0.13913043 0.13043478	2.91992	1.10336	1.88618	1.10336	0.732974	Two_patches	Sucrose	Anosmic	['0-10', '10-20', '20-30', '30-40', '40-50', '50-60', '60-70', '70-80', '80-90', '90-100']	422	5932	0.0711396	221.308	1294.21	469.866	2.07874	3.85366	94	30	0.0607176	0.0956416
															0.36842105 0.53846154 1. 0.66666667]	0.16521739 0.11304348 0.05217391 0.02608696]
exp1_larva_9	0.336757	0.467684	0.430022	0.609734		-0.408163	0.69598	0.375521	0.663513	0.368235			9.80115	5.12967	[0. 0. 0. 0. 0.5 0.22222222	[0. 0. 0. 0.01886792 0.05660377 0.16981132	3.29876	2.12535	2.61053	2.12535	0.108193	Two_patches	Sucrose	Anosmic	['0-10', '10-20', '20-30', '30-40', '40-50', '50-60', '60-70', '70-80', '80-90', '90-100']	865	5065	0.17078		171.559	1228.49	2.3913	3.80282	12	101	0.100365	0.148569
															0.66666667 0.46153846 0.75 0.77777778]	0.19811321 0.24528302 0.22641509 0.08490566]
exp2_larva_0	0.548745	0.669924	0.398704	0.468144	-0.419355	-0.04	0.346737	0.190518	0.525138	0.183064	12.7598	9.41629	14.732	12.3868	[0.66666667 0.625 0.81818182 0.28571429 0.57142857 0.8	[0.05357143 0.14285714 0.19642857 0.125 0.125 0.08928571	0.747515	0.81012	1.49104	0.81012	0.66881	Two_patches	Sucrose	Anosmic	['0-10', '10-20', '20-30', '30-40', '40-50', '50-60', '60-70', '70-80', '80-90', '90-100']	767	5909	0.129802		556.859	505.183	2.40656	1.375	31	27	0.185729	0.0161133
															0.33333333 0. 0.75 0.75 ]	0.10714286 0.01785714 0.07142857 0.07142857]
exp2_larva_1	0.350245	0.428118	0.337808	0.447226	0.0526316	-0.238095	0.583966	0.183438	0.602308	0.204882	11.2562	4.88188	11.6325	6.24653	[0.5 0.6969697 1. 0. 1. 0.	[0.18181818 0.42857143 0.23376623 0.01298701 0.01298701 0.	2.46089	0.671305	2.93502	0.671305	0.716631	Two_patches	Sucrose	Anosmic	['0-10', '10-20', '20-30', '30-40', '40-50', '50-60', '60-70', '70-80', '80-90', '90-100']	26	3776	0.00688559	155.007	783.098	316.814	1	2.4	59	29	0.00517369	0.00364299
															0.5 0. 0.5 0.66666667]	0.02597403 0.01298701 0.05194805 0.03896104]
exp2_larva_2	0.408691	0.506548	0.3117	0.423773	-0.153846		0.671657	0.283579	0.792006	0.277187	6.67136	5.00101			[0.5 0.66666667 0.66666667 0. 1. 0.	[0.19354839 0.48387097 0.19354839 0. 0.03225806 0.	4.21385	0.235294	3.05882	0.235294	0.847656	Two_patches	Sucrose	Anosmic	['0-10', '10-20', '20-30', '30-40', '40-50', '50-60', '60-70', '70-80', '80-90', '90-100']	15	1024	0.0146484	187.805	285.79	60.9844	1	1	26	6	0.014977	0.000389712
															1. 0.5 0. 0. ]	0.03225806 0.06451613 0. 0. ]
exp2_larva_3	0.744054	0.846595					0.183575	0.0945748							[0. 0.54545455 1. 0. 0. 0.	[0.13333333 0.73333333 0.13333333 0. 0. 0.	0.0606961				1	Two_patches	Sucrose	Anosmic	['0-10', '10-20', '20-30', '30-40', '40-50', '50-60', '60-70', '70-80', '80-90', '90-100']	3927	5815	0.675322	58.8721	171.918	0	8.01429		13	3	0.675322	0
															0. 0. 0. 0. ]	0. 0. 0. 0. ]
exp2_larva_4	0.403588	0.525109	0.351925	0.523749	-0.0740741	-0.0243902	0.632087	0.327344	0.755243	0.329498	12.6642	7.89126	13.4889	7.41605	[0.42857143 0.71428571 0.96 0. 0.75 0.66666667	[0.07142857 0.21428571 0.25510204 0.02040816 0.04081633 0.03061224	2.1797	1.2353	3.11344	1.2353	0.60414	Two_patches	Sucrose	Anosmic	['0-10', '10-20', '20-30', '30-40', '40-50', '50-60', '60-70', '70-80', '80-90', '90-100']	114	4686	0.0243278	104.331	860.902	693.691	1.81481	1.23077	56	45	0.0346167	0.00504891
															0.66666667 0.7 0.57142857 0.8 ]	0.09183673 0.10204082 0.07142857 0.10204082]
exp2_larva_5	0.593471	0.716548	0.617557	0.701227	-0.130435		0.282639	0.168823	0.220798	0.111992	7.77011	13.6263			[0.375 0.66666667 0.7 1. 0. 0.	[0.22222222 0.33333333 0.27777778 0.05555556 0.02777778 0.05555556	0.490314	0.518624	0.377371	0.518624	0.67389	Two_patches	Sucrose	Anosmic	['0-10', '10-20', '20-30', '30-40', '40-50', '50-60', '60-70', '70-80', '80-90', '90-100']	1666	5768	0.288835	93.4732	370.256	161.514	3.25849	1.58333	26	11	0.32107	0.197823
															1. 0. 0. 0. ]	0.02777778 0. 0. 0. ]
exp2_larva_6	0.424347	0.517182	0.272737	0.24498	-0.0545455		0.640824	0.256561	0.80342	0.21151	6.82825	4.40213			[0.28571429 0.53333333 0.75 1. 1. 0.5	[0.10447761 0.44776119 0.29850746 0.04477612 0.01492537 0.02985075	4.19792				0.932162	Two_patches	Sucrose	Anosmic	['0-10', '10-20', '20-30', '30-40', '40-50', '50-60', '60-70', '70-80', '80-90', '90-100']	19	2049	0.00927282	180.535	599.17	55.436	1.58333		65	9	0.00994764	0
															0. 1. 0. 0.5 ]	0.01492537 0.01492537 0. 0.02985075]
exp2_larva_7	0.510164	0.547928	0.407718	0.459573	-0.254902		0.356488	0.132056	0.389977	0.129523	10.1627	8.68722			[0.125 0.65 0.66666667 0. 1. 0.33333333	[0.13559322 0.33898305 0.15254237 0.01694915 0.03389831 0.05084746	1.53299	0.917849	1.16699	0.917849	0.739191	Two_patches	Sucrose	Anosmic	['0-10', '10-20', '20-30', '30-40', '40-50', '50-60', '60-70', '70-80', '80-90', '90-100']	152	5713	0.026606	91.1616	730.087	279.029	1.2973	2.07407	58	18	0.0227327	0.0315138
															0.75 0.5 0.75 0.5 ]	0.06779661 0.06779661 0.06779661 0.06779661]
exp2_larva_8	0.408012	0.532126	0.349678	0.424592	0.0606061	0.0909091	0.65057	0.250661	0.620245	0.279211	9.01539	7.41297	11.3378	7.29726	[0.76923077 0.61111111 0.85714286 1. 0.66666667 0.66666667	[0.1547619 0.42857143 0.25 0.01190476 0.03571429 0.03571429	2.92593	0.910192	1.88889	0.910192	0.640823	Two_patches	Sucrose	Anosmic	['0-10', '10-20', '20-30', '30-40', '40-50', '50-60', '60-70', '70-80', '80-90', '90-100']	30	4179	0.00717875	173.094	860.379	461.152	1.15	1.16667	68	42	0.0085885	0.00210716
															1. 0. 0. 0.2 ]	0.01190476 0.01190476 0. 0.05952381]
exp2_larva_9	0.396271	0.425056	0.383327	0.384679	-0.454545		0.386224	0.123017	0.382338	0.11035	13.2989	11.0165			[0.5 0.33333333 0.83333333 1. 1. 1.	[0.08333333 0.25 0.25 0.04166667 0.04166667 0.04166667	1.44444	0.542626	0.832	0.542626	0.694455	Two_patches	Sucrose	Anosmic	['0-10', '10-20', '20-30', '30-40', '40-50', '50-60', '60-70', '70-80', '80-90', '90-100']	27	2687	0.0100484	99.5077	354.554	156.759	1.3	1	23	6	0.0139335	0.000241896
															1. 0.5 0. 0.66666667]	0.08333333 0.08333333 0. 0.125 ]
exp3_larva_0	0.444056	0.607005	0.356947	0.488164	0.741935		0.69236	0.348405	0.86435	0.355625	6.25	6.19145			[0.33333333 0.66666667 0.6 0.625 0.33333333 1.	[0.06 0.12 0.1 0.32 0.06 0.02 0.04 0.1 0.1 0.08]	4.70367	0.626619	5.26549	0.626619	0.710717	Two_patches	Sucrose	Anosmic	['0-10', '10-20', '20-30', '30-40', '40-50', '50-60', '60-70', '70-80', '80-90', '90-100']	102	1521	0.0670611	131.571	352.758	170.709	1.69444	3.15385	31	21	0.0564292	0.00884383
															0.5 0.6 0.4 0.75 ]
exp3_larva_3	0.459466	0.564061	0.550649	0.598669	-0.364486		0.516703	0.284526	0.391815	0.154156	9.07348	5.93312			[0.7 0.6 0.68181818 0.46153846 1. 0.33333333	[0.09090909 0.22727273 0.2 0.11818182 0.02727273 0.13636364	2.31474	0.285766	1.91029	0.285766	0.973901	Two_patches	Sucrose	Anosmic	['0-10', '10-20', '20-30', '30-40', '40-50', '50-60', '60-70', '70-80', '80-90', '90-100']	485	5709	0.0849536		1312.94	27.427	2.59239	1.14286	107	4	0.0857914	0.0509554
															0.69230769 0.83333333 0. 1. ]	0.11818182 0.05454545 0.00909091 0.01818182]
exp3_larva_4	0.359422	0.497502	0.259146	0.406446	0.1875		0.758825	0.337641	0.873728	0.290069	11.2427	8.19972			[0. 0.66666667 0.71428571 0.41666667 0.71428571 0.75	[0.04878049 0.14634146 0.17073171 0.29268293 0.17073171 0.09756098	3.20366	0.704457	3.89069	0.704457	0.740357	Two_patches	Sucrose	Anosmic	['0-10', '10-20', '20-30', '30-40', '40-50', '50-60', '60-70', '70-80', '80-90', '90-100']	31	1737	0.0178469	198.209	476.163	196.589	1.42857	1	33	14	0.0233281	0.000225683
															1. 0. 1. 0. ]	0.04878049 0. 0.02439024 0. ]
exp3_larva_5	0.44137	0.500594	0.540016	0.53815	-0.254902		0.418913	0.152857	0.424935	0.172077	7.95004	6.58742			[0.61538462 1. 0.46153846 0.625 0.25 1.	[0.25490196 0.09803922 0.25490196 0.15686275 0.07843137 0.09803922	2.09836				0.927174	Two_patches	Sucrose	Anosmic	['0-10', '10-20', '20-30', '30-40', '40-50', '50-60', '60-70', '70-80', '80-90', '90-100']	77	3323	0.0231718	109.973	628.998	50.7798	1.78571	1	50	9	0.0243427	0.000758725
															0. 0. 1. 1. ]	0. 0.01960784 0.01960784 0.01960784]
exp3_larva_6	0.394645	0.494412	0.383102	0.523153	-0.0352941		0.516704	0.215186	0.564728	0.218017	9.58362	5.12194			[0.25 0.54545455 0.91666667 1. 0.66666667 1.	[0.15384615 0.21153846 0.23076923 0.03846154 0.05769231 0.01923077	2.36313	0.465102	1.71481	0.465102	0.878666	Two_patches	Sucrose	Anosmic	['0-10', '10-20', '20-30', '30-40', '40-50', '50-60', '60-70', '70-80', '80-90', '90-100']	289	4739	0.0609833	118.19	1004.99	155.865	2.70707	1.5	86	15	0.0643612	0.0135222
															0.66666667 0.42857143 1. 0.5 ]	0.05769231 0.13461538 0.01923077 0.07692308]
exp3_larva_7	0.393151	0.447587	0.346219	0.399726	0.0909091		0.430407	0.145762	0.465143	0.14567	8.81273	9.78496			[0. 0. 0.5 1. 0. 0.	[0. 0. 0.18181818 0.09090909 0. 0.	2.0485	0.609988	1.57197	0.609988	0.53013	Two_patches	Sucrose	Anosmic	['0-10', '10-20', '20-30', '30-40', '40-50', '50-60', '60-70', '70-80', '80-90', '90-100']	42	2456	0.017101	133.799	277.182	261.41	1	2.9	21	17	0.00998464	0.00656852
															0. 0. 0.66666667 0.5 ]	0. 0.09090909 0.27272727 0.36363636]
exp3_larva_8	0.343663	0.402652	0.354701	0.455113	0.269231	0.310345	0.553209	0.198847	0.532707	0.228854	9.24849	8.23506	10.6705	7.40749	[1. 0.25 0.90909091 0.28571429 0.83333333 0.	[0.02739726 0.05479452 0.15068493 0.09589041 0.08219178 0.	2.73375	1.43659	2.48915	1.43659	0.599146	Two_patches	Sucrose	Anosmic	['0-10', '10-20', '20-30', '30-40', '40-50', '50-60', '60-70', '70-80', '80-90', '90-100']	47	3979	0.011812	175.756	651.957	418.974	1.08333	1.10526	52	32	0.010906	0.00630063
															0. 0.34782609 0.66666667 0.8 ]	0.04109589 0.31506849 0.16438356 0.06849315]
exp3_larva_9	0.387257	0.437715	0.314187	0.4362	0		0.517534	0.184161	0.579535	0.189652					[0. 0. 0. 0. 0. 1.	[0. 0. 0. 0. 0. 0.11111111	2.49075	0.663041	2.05725	0.663041	0.493899	Two_patches	Sucrose	Anosmic	['0-10', '10-20', '20-30', '30-40', '40-50', '50-60', '60-70', '70-80', '80-90', '90-100']	23	2049	0.011225	134.4	258.767	296.432	1.22222	1.33333	20	21	0.0108696	0.00255048
															0. 0. 0.33333333 0.4 ]	0. 0. 0.33333333 0.55555556]
MEAN	0.47551	0.577216	0.413243	0.508468	-0.0569767	-0.136299	0.492365	0.238671	0.580267	0.238029	9.62829	7.07514	11.8089	7.53341			2.04541	0.889247	2.27894	0.889247	0.696838					709.071	4407.25	0.129145	135.811	586.954	353.684	2.42257	1.95152	44.8214	28.1786	0.139499	0.0474315
STD	0.101111	0.116155	0.0994089	0.105943	0.328976	0.327362	0.143346	0.0766802	0.17049	0.0765113	1.91881	2.47948	2.237	2.63176			1.2125	0.449069	1.1817	0.449069	0.187998					985.525	1611.68	0.16806	39.818	295.244	299.3	1.69247	0.980276	24.1174	24.8798	0.177868	0.0781653
N Samples	28	28	27	27	25	13	28	28	27	27	24	24	12	12			28	24	24	24	28					28	28	28	21	28	28	28	26	28	28	28	28
ID	turning_rate_in	std_turning_rate_in	turning_rate_out	std_turning_rate_out	handedness_in	handedness_out	speed_in	std_speed_in	speed_out	std_speed_out	steps_in	std_steps_in	steps_out	std_steps_out	dist_turns_in	dist_turns_all	num_turns_min_in	std_num_turns_min_in	num_turns_min_out	std_num_turns_min_out	ratio_in_out	env	substrate	larva_type	dist_labels	frames_not_moving	recorded_frames	pause_proportion	dist_five_min	crawl_dist_inside	crawl_dist_outside	pause_duration_inside	pause_duration_outside	total_turns_inside	total_turns_outside	prop_pause_inside	prop_pause_outside
exp1_larva_0	0.386969	0.599382	0.404767	0.51157	0.466667	0.12	0.462638	0.278658	0.513252	0.23139	8.50827	5.34904	8.94864	8.9432	[0. 0. 0. 0.33333333 0. 0.6	[0. 0. 0. 0.06666667 0.04444444 0.11111111	1.49037	0.926706	1.72569	0.926706	0.621325	Two_patches	Yeast	Anosmic	['0-10', '10-20', '20-30', '30-40', '40-50', '50-60', '60-70', '70-80', '80-90', '90-100']	931	3742	0.248797	126.431	337.726	345.419	4.16908	1.83784	31	30	0.371183	0.0185034
															0.6 0.61538462 0.28571429 0.8 ]	0.11111111 0.28888889 0.15555556 0.22222222]
exp1_larva_1	0.332196	0.473981	0.284294	0.373886	-0.695652	-0.68	0.520265	0.237921	0.604226	0.159807	7.76209	4.60288	8.47077	6.81938	[0. 0.33333333 0.33333333 0.5 0.16666667 0.33333333	[0. 0.02272727 0.02272727 0.03030303 0.04545455 0.11363636	2.34505	1.1221	3.60489	1.1221	0.718734	Two_patches	Yeast	Anosmic	['0-10', '10-20', '20-30', '30-40', '40-50', '50-60', '60-70', '70-80', '80-90', '90-100']	705	5877	0.119959		916.706	496.372	2.96596	1.33333	93	54	0.165009	0.0045045
															0.52380952 0.54166667 0.33333333 0.75862069]	0.15909091 0.18181818 0.20454545 0.21969697]
exp1_larva_4	0.606373	0.778423	0.448625	0.554876	0.607843	0.538462	0.292776	0.198882	0.466761	0.190932	6.78372	4.05014	7.73183	4.38309	[0.66666667 0.66666667 0.66666667 0.47368421 0.5 0.	[0.11538462 0.07692308 0.03846154 0.24358974 0.1025641 0.01282051	1.02021	1.70696	3.5213	1.70696	0.733704	Two_patches	Yeast	Anosmic	['0-10', '10-20', '20-30', '30-40', '40-50', '50-60', '60-70', '70-80', '80-90', '90-100']	1272	5937	0.21425		458.34	357.305	2.69011	1.45455	51	42	0.280992	0.0291971
															0.33333333 0.28571429 0.22222222 0.46153846]	0.03846154 0.08974359 0.11538462 0.16666667]
exp1_larva_6	0.408648	0.59978	0.269632	0.39437	-0.0697674	0.111111	0.495312	0.288381	0.678498	0.238961	8.17244	8.67683	13.526	8.80647	[0. 0. 0.4 0.33333333 0.66666667 0.	[0. 0.03921569 0.09803922 0.05882353 0.05882353 0.07843137	0.973085	1.03155	2.64599	1.03155	0.549683	Two_patches	Yeast	Anosmic	['0-10', '10-20', '20-30', '30-40', '40-50', '50-60', '60-70', '70-80', '80-90', '90-100']	1079	5998	0.179893	179.543	573.076	883.405	4.40359	2.02083	43	56	0.297847	0.0358861
															0.5 0.3 0.77777778 0.44444444]	0.11764706 0.19607843 0.17647059 0.17647059]
exp1_larva_8	0.539578	0.721645	0.548418	0.64615	-0.545455		0.296451	0.188674	0.334654	0.173829	6.18088	2.63992			[0. 0.5 0.4 0.8 0. 0.	[0. 0.04347826 0.10869565 0.2173913 0.02173913 0.	1.27147	0.488123	1.39167	0.488123	0.893202	Two_patches	Yeast	Anosmic	['0-10', '10-20', '20-30', '30-40', '40-50', '50-60', '60-70', '70-80', '80-90', '90-100']	1692	4457	0.379628		349.664	67.7675	4.26579	2.15152	44	8	0.407184	0.0351659
															0.5 0.5 0.41666667 0.8 ]	0.04347826 0.08695652 0.26086957 0.2173913 ]
exp2_larva_0	0.375322	0.488772	0.400426	0.504261	0.15	0.260274	0.584824	0.237057	0.62746	0.233366	13.1802	7.89378	10.11	6.5395	[0. 0.5 0.5 0.42857143 0.66666667 0.83333333	[0. 0.03448276 0.03448276 0.12068966 0.15517241 0.10344828	2.14465	1.29635	3.11927	1.29635	0.456484	Two_patches	Yeast	Anosmic	['0-10', '10-20', '20-30', '30-40', '40-50', '50-60', '60-70', '70-80', '80-90', '90-100']	284	5159	0.0550494	119.883	662.313	816.954	1.79592	4.45455	39	80	0.0373673	0.0537723
															0.75 0.33333333 0.66666667 0.57142857]	0.06896552 0.20689655 0.15517241 0.12068966]
exp2_larva_1	0.294027	0.349351	0.333572	0.384558	-0.5	-0.0434783	0.664229	0.187364	0.673472	0.211067	7.88352	4.22914	5.69092	3.22392	[1. 1. 1. 0. 0.33333333 0.5	[0.04761905 0.04761905 0.07142857 0.02380952 0.07142857 0.19047619	3.96629	0.759404	5.57143	0.759404	0.57856	Two_patches	Yeast	Anosmic	['0-10', '10-20', '20-30', '30-40', '40-50', '50-60', '60-70', '70-80', '80-90', '90-100']	5	1222	0.00409165	198.725	233.809	172.072	1	1	23	26	0.00141443	0.000755715
															0.66666667 0.33333333 0.5 0.8 ]	0.07142857 0.21428571 0.14285714 0.11904762]
exp2_larva_2	0.390781	0.52679	0.329525	0.439624	0.785714	0.706215	0.712159	0.308395	0.845763	0.277616	6.92647	2.63236	6.35313	3.30115	[0. 0.4 0.375 0.63157895 0.34883721 0.60416667	[0. 0.0209205 0.0334728 0.15899582 0.17991632 0.20083682	6.15816	1.32333	6.86781	1.32333	0.288852	Two_patches	Yeast	Anosmic	['0-10', '10-20', '20-30', '30-40', '40-50', '50-60', '60-70', '70-80', '80-90', '90-100']	48	4189	0.0114586	176.416	417.325	1252.15	1.56522	1	56	185	0.0297521	0.00250522
															0.73333333 0.375 0.56521739 0.85 ]	0.12552301 0.10041841 0.09623431 0.08368201]
exp2_larva_3	0.415095	0.543155	0.305881	0.411125	0.375	0.37931	0.458766	0.248547	0.616735	0.218928	9.54099	7.02173	11.08	6.25775	[0.6 0.33333333 0.54545455 0.86956522 0.6 0.375	[0.1 0.06 0.11 0.23 0.2 0.08 0.08 0.04 0.04 0.06]	1.73548	1.01223	3.07357	1.01223	0.537895	Two_patches	Yeast	Anosmic	['0-10', '10-20', '20-30', '30-40', '40-50', '50-60', '60-70', '70-80', '80-90', '90-100']	412	5291	0.0778681	200.548	570.017	735.148	2.70992	1.96552	50	64	0.124736	0.0180723
															0.625 0.75 0.25 0.66666667]
exp2_larva_4	0.434987	0.49856	0.512063	0.584863	-0.826087	-0.0869565	0.320003	0.12478	0.353484	0.143323	8.21679	3.73701	6.71984	5.87025	[0.8 0.71428571 0.83333333 0. 1. 0.42857143	[0.15625 0.21875 0.1875 0. 0.03125 0.21875 0.03125 0.0625 0.0625	1.55367	1.16617	2.35149	1.16617	0.429323	Two_patches	Yeast	Anosmic	['0-10', '10-20', '20-30', '30-40', '40-50', '50-60', '60-70', '70-80', '80-90', '90-100']	190	3990	0.047619	97.5562	258.563	384.944	1.66667	1.75926	23	53	0.0554583	0.02216
															1. 0.5 0.5 0. ]	0.03125]
exp2_larva_6	0.415089	0.561257	0.31106	0.443495	-0.25	-0.44186	0.571687	0.317629	0.786062	0.287222	7.46497	5.22856	8.50827	5.54389	[0.6 0.59259259 0.6 0.57142857 0.38461538 0.38095238	[0.03246753 0.17532468 0.0974026 0.04545455 0.08441558 0.13636364	3.30798	1.16817	4.73376	1.16817	0.584533	Two_patches	Yeast	Anosmic	['0-10', '10-20', '20-30', '30-40', '40-50', '50-60', '60-70', '70-80', '80-90', '90-100']	310	5767	0.0537541	221.5	900.407	903.578	1.81513	2.84848	100	89	0.0640759	0.035755
															0.57142857 0.6 0.55555556 0.33333333]	0.13636364 0.0974026 0.11688312 0.07792208]
exp2_larva_7	0.484984	0.526234	0.454564	0.507989	-0.4		0.370473	0.13831	0.368513	0.140681	6.79114	3.77469			[0. 0. 0. 0.33333333 0. 1.	[0. 0. 0.03333333 0.2 0.03333333 0.06666667	2.60093	1.38742	1.90833	1.38742	0.756644	Two_patches	Yeast	Anosmic	['0-10', '10-20', '20-30', '30-40', '40-50', '50-60', '60-70', '70-80', '80-90', '90-100']	66	1919	0.0343929	107.328	259.146	83.284	1.5	1.36364	30	9	0.035124	0.00329815
															0.5 0.5 0.4 0.75 ]	0.06666667 0.13333333 0.33333333 0.13333333]
exp2_larva_8	0.347415	0.421271	0.35603	0.462185	-0.2	0.0769231	0.561898	0.187868	0.599668	0.188227	8.72944	7.5982	10.3078	6.74743	[0. 0.2 0.58333333 1. 0.33333333 0.4	[0. 0.03846154 0.09230769 0.02307692 0.09230769 0.11538462	2.81479	1.14585	3.30428	1.14585	0.493239	Two_patches	Yeast	Anosmic	['0-10', '10-20', '20-30', '30-40', '40-50', '50-60', '60-70', '70-80', '80-90', '90-100']	41	5768	0.00710818	193.621	790.872	872.517	1.55556	1	66	80	0.00984183	0.00412044
															0.56 0.68181818 0.44 0.63636364]	0.19230769 0.16923077 0.19230769 0.08461538]
exp3_larva_0	0.377898	0.492694	0.279435	0.332795	-0.206897		0.634021	0.259504	0.576795	0.19551	6.99665	3.97983			[0. 0. 0. 0. 0. 0.4	[0. 0. 0. 0. 0.01449275 0.36231884	4.30104	0.672697	2.82743	0.672697	0.773747	Two_patches	Yeast	Anosmic	['0-10', '10-20', '20-30', '30-40', '40-50', '50-60', '60-70', '70-80', '80-90', '90-100']	30	2095	0.0143198	166.45	506.9	133.816	1.33333	1.42857	59	18	0.0123381	0.00228363
															0.71428571 0.73333333 0.66666667 0.4 ]	0.20289855 0.2173913 0.13043478 0.07246377]
exp3_larva_1	0.762461	0.901663	0.871368	0.900836	0.363636		0.17921	0.0982946	0.223996	0.192469	7.33677	4.59636			[0. 0.77777778 0.5 0.75 0.8 0.	[0.08333333 0.375 0.16666667 0.16666667 0.20833333 0.	0.465932				0.982465	Two_patches	Yeast	Anosmic	['0-10', '10-20', '20-30', '30-40', '40-50', '50-60', '60-70', '70-80', '80-90', '90-100']	2661	5874	0.453013		280.463	9.07185	3.34177	1.3125	22	3	0.45746	0.0917031
															0. 0. 0. 0. ]	0. 0. 0. 0. ]
exp3_larva_2	0.642702	0.773802	0.557438	0.534004	0.809524		0.207543	0.116475	0.29573	0.122467	5.46141	2.37023			[0.4 0.71428571 1. 0. 0. 0.	[0.2173913 0.60869565 0.17391304 0. 0. 0.	0.361954				0.988165	Two_patches	Yeast	Anosmic	['0-10', '10-20', '20-30', '30-40', '40-50', '50-60', '60-70', '70-80', '80-90', '90-100']	3637	5830	0.623842		220.514	9.61124	6.35315	1	21	3	0.630793	0.0125523
															0. 0. 0. 0. ]	0. 0. 0. 0. ]
exp3_larva_3	0.495446	0.672938	0.326644	0.456088	-0.0461538	-0.116279	0.392503	0.25519	0.545363	0.221363	6.57985	5.30199	8.40015	5.02975	[0. 0.5 0.25 0.9 1. 0.	[0. 0.02816901 0.28169014 0.14084507 0.02816901 0.01408451	1.52791	1.38272	2.86194	1.38272	0.716739	Two_patches	Yeast	Anosmic	['0-10', '10-20', '20-30', '30-40', '40-50', '50-60', '60-70', '70-80', '80-90', '90-100']	1262	5998	0.210403	75.3502	617.8	432.746	3.23034	3.02703	65	45	0.267504	0.0658436
															0.71428571 0.4 0.54545455 0.5 ]	0.09859155 0.14084507 0.15492958 0.11267606]
exp3_larva_4	0.412827	0.530154	0.406401	0.502083	0.313433	0.283019	0.437451	0.16597	0.435425	0.162154	7.44249	5.40047	8.0898	6.74221	[0. 0. 0. 0.4 0.6 0.28571429	[0. 0. 0. 0.04545455 0.04545455 0.06363636	2.52963	0.752156	2.09502	0.752156	0.528843	Two_patches	Yeast	Anosmic	['0-10', '10-20', '20-30', '30-40', '40-50', '50-60', '60-70', '70-80', '80-90', '90-100']	410	5998	0.0683561	130.098	641.085	578.245	2.96296	1.91011	66	56	0.075662	0.0601132
															0.25 0.33333333 0.45454545 0.75675676]	0.07272727 0.13636364 0.3 0.33636364]
exp3_larva_7	0.679317	0.83602	0.716763	0.953887	-0.677419		0.264177	0.199917	0.17887	0.134792	4.96685	2.86609			[0. 0.5 0.25 0.6 0. 0.66666667	[0.02631579 0.05263158 0.10526316 0.26315789 0.07894737 0.07894737	0.95	0.291814	0.0939891	0.291814	0.620125	Two_patches	Yeast	Anosmic	['0-10', '10-20', '20-30', '30-40', '40-50', '50-60', '60-70', '70-80', '80-90', '90-100']	3056	5615	0.544256		232.608	71.1007	4.32997	5.04528	31	8	0.493682	0.530977
															0.33333333 0.83333333 0. 0. ]	0.23684211 0.15789474 0. 0. ]
exp3_larva_8	0.406196	0.551895	0.371021	0.472132	-0.15493	-0.142857	0.482544	0.242272	0.547863	0.207604	7.60957	6.44042	9.05985	5.35825	[0. 0.2 0.66666667 0.16666667 0.5 0.52631579	[0.00840336 0.04201681 0.07563025 0.05042017 0.13445378 0.15966387	2.49556	1.28546	3.41113	1.28546	0.555685	Two_patches	Yeast	Anosmic	['0-10', '10-20', '20-30', '30-40', '40-50', '50-60', '60-70', '70-80', '80-90', '90-100']	397	5989	0.0662882	86.969	727.917	704.825	2.1831	1.8125	71	72	0.093149	0.0325599
															0.90909091 0.5 0.33333333 0.46153846]	0.09243697 0.10084034 0.22689076 0.1092437 ]
exp3_larva_9	0.62449	0.634972	0.717142	0.740484	0.12	-0.333333	0.287221	0.110937	0.25767	0.115078	5.10667	3.18969	5.85315	4.08976	[0. 0. 0. 1. 0.4 0.66666667	[0. 0.02857143 0. 0.02857143 0.14285714 0.34285714	2.48294	1.14156	0.791911	1.14156	0.244524	Two_patches	Yeast	Anosmic	['0-10', '10-20', '20-30', '30-40', '40-50', '50-60', '60-70', '70-80', '80-90', '90-100']	2006	5570	0.360144	101.084	189.279	288.59	1.18182	7.50763	28	36	0.0286344	0.424105
															0.33333333 0.5 1. 0.3 ]	0.08571429 0.05714286 0.02857143 0.28571429]
MEAN	0.468229	0.594416	0.438337	0.529108	-0.0276449	0.0420366	0.437912	0.209097	0.501441	0.192704	7.50672	4.83711	8.59001	5.84373			2.21415	1.05583	2.94215	1.05583	0.621546					975.905	4870.71	0.179738	145.433	483.073	457.092	2.71521	2.2492	48.1905	48.4286	0.187581	0.0706588
STD	0.123682	0.137492	0.159798	0.158398	0.476143	0.35578	0.149178	0.0646231	0.179352	0.046477	1.69968	1.78019	2.02673	1.65616			1.35505	0.334003	1.54868	0.334003	0.19183					1046.33	1455.14	0.183841	46.073	226.142	348.727	1.35186	1.57664	22.33	40.3456	0.185643	0.135101
N Samples	21	21	21	21	21	15	21	21	21	21	21	21	15	15			21	19	19	19	21					21	21	21	15	21	21	21	21	21	21	21	21
ID	turning_rate_in	std_turning_rate_in	turning_rate_out	std_turning_rate_out	handedness_in	handedness_out	speed_in	std_speed_in	speed_out	std_speed_out	steps_in	std_steps_in	steps_out	std_steps_out	dist_turns_in	dist_turns_all	num_turns_min_in	std_num_turns_min_in	num_turns_min_out	std_num_turns_min_out	ratio_in_out	env	substrate	larva_type	dist_labels	frames_not_moving	recorded_frames	pause_proportion	dist_five_min	crawl_dist_inside	crawl_dist_outside	pause_duration_inside	pause_duration_outside	total_turns_inside	total_turns_outside	prop_pause_inside	prop_pause_outside
exp1_larva_0	0.570695	0.701978	0.438478	0.544818	0.380952	0.3	0.343558	0.258079	0.614031	0.408615	10.8002	7.54299	11.3033	6.69981	[0. 0.33333333 0.87096774 0.7 0.6 1.	[0.01587302 0.23809524 0.49206349 0.15873016 0.07936508 0.01587302	0.950399	1.73665	3.50355	1.73665	0.856589	Two_patches	Apple_juice	Anosmic	['0-10', '10-20', '20-30', '30-40', '40-50', '50-60', '60-70', '70-80', '80-90', '90-100']	794	5934	0.133805	71.3685	744.319	247.147	1.69231	1.39394	42	22	0.147157	0.0501636
															0. 0. 0. 0. ]	0. 0. 0. 0. ]
exp1_larva_1	0.40893	0.528059	0.34416	0.458606	0	0.0679612	0.57441	0.369561	0.82569	0.354616	12.921	7.75731	9.81469	6.41856	[0. 0.8 0.76923077 0.38888889 0.38461538 0.69230769	[0.00689655 0.03448276 0.08965517 0.12413793 0.17931034 0.17931034	1.09404	1.11379	4.01351	1.11379	0.453752	Two_patches	Apple_juice	Anosmic	['0-10', '10-20', '20-30', '30-40', '40-50', '50-60', '60-70', '70-80', '80-90', '90-100']	300	5957	0.0503609	114.574	704.801	1320.69	2.14783	2.12	39	108	0.0913799	0.0160752
															0.63636364 0.72727273 1. 0.66666667]	0.15172414 0.15172414 0.04137931 0.04137931]
exp1_larva_2	0.454798	0.569834	0.444775	0.599531	0.377358	0.0769231	0.563189	0.38296	0.72316	0.422014	10.4653	5.61935	11.0708	7.80814	[0.36363636 0.65 0.88571429 0.66666667 0.28571429 0.7	[0.08461538 0.15384615 0.26923077 0.09230769 0.05384615 0.07692308	2.61647	0.708325	2.43605	0.708325	0.825474	Two_patches	Apple_juice	Anosmic	['0-10', '10-20', '20-30', '30-40', '40-50', '50-60', '60-70', '70-80', '80-90', '90-100']	262	5959	0.0439671	115.511	1320.12	363.749	1.23243	1.61905	105	29	0.0463509	0.0314524
															0.23076923 0.5 1. 0. ]	0.1 0.12307692 0.04615385 0. ]
exp1_larva_3	0.541481	0.660672	0.454658	0.566716	-0.137931	-0.290323	0.448871	0.337267	0.667547	0.386409	10.8167	7.34306	10.8232	6.83922	[0. 0.44444444 0.64285714 0.66666667 0.6 0.5	[0.01098901 0.0989011 0.30769231 0.13186813 0.21978022 0.08791209	1.2145	1.55705	3.09444	1.55705	0.79117	Two_patches	Apple_juice	Anosmic	['0-10', '10-20', '20-30', '30-40', '40-50', '50-60', '60-70', '70-80', '80-90', '90-100']	522	5957	0.087628	55.4711	949.139	401.196	1.6087	1.24242	58	34	0.102058	0.031857
															0.4 0.625 0. 0. ]	0.05494505 0.08791209 0. 0. ]
exp1_larva_5	0.46767	0.603531	0.392054	0.515368	-0.0952381	0.254902	0.493748	0.341177	0.820282	0.344505	12.2875	5.86956	9.81867	6.80604	[1. 0.5 0.76923077 0.31818182 0.55172414 0.6	[0.00680272 0.05442177 0.08843537 0.14965986 0.19727891 0.13605442	1.50205	1.45468	4.03237	1.45468	0.417926	Two_patches	Apple_juice	Anosmic	['0-10', '10-20', '20-30', '30-40', '40-50', '50-60', '60-70', '70-80', '80-90', '90-100']	235	5824	0.0403503	81.7314	549.048	1376.43	1.52593	1.38095	43	105	0.0846343	0.00813236
															0.53846154 0.72222222 0.875 1. ]	0.17687075 0.12244898 0.05442177 0.01360544]
exp1_larva_6	0.516568	0.641319	0.430379	0.569859	0.04	-0.151515	0.454671	0.335622	0.788559	0.422661	12.4905	9.79998	10.9447	8.57472	[0. 0.44444444 0.73076923 0.46153846 0.6 0.83333333	[0.03488372 0.10465116 0.30232558 0.15116279 0.1744186 0.06976744	1.3074	0.798675	3.37158	0.798675	0.767743	Two_patches	Apple_juice	Anosmic	['0-10', '10-20', '20-30', '30-40', '40-50', '50-60', '60-70', '70-80', '80-90', '90-100']	569	5791	0.0982559	301.458	887.972	515.718	1.94891	2.69231	52	35	0.120108	0.0225225
															0.57142857 0.8 0. 1. ]	0.08139535 0.05813953 0. 0.02325581]
exp1_larva_7	0.438604	0.54148	0.406849	0.532422	0.04	0.0632911	0.588787	0.324323	0.77249	0.358453	10.9808	7.2359	12.5281	8.54157	[0. 0. 1. 0. 0.21052632 0.66666667	[0. 0.016 0.072 0.04 0.152 0.288 0.112 0.056 0.12 0.144]	1.63201	1.14262	3.34959	1.14262	0.494263	Two_patches	Apple_juice	Anosmic	['0-10', '10-20', '20-30', '30-40', '40-50', '50-60', '60-70', '70-80', '80-90', '90-100']	203	5926	0.0342558	89.3104	812.821	1141.35	1.57143	1.26667	50	83	0.0563332	0.0123738
															0.64285714 0.14285714 0.4 0.72222222]
exp1_larva_8	0.468824	0.581089	0.381365	0.492341	0.403846	0.368421	0.610501	0.385528	0.815062	0.372338	10.7245	7.77055	11.0068	3.9617	[0.75 0.36363636 0.68421053 0.71428571 0.53846154 0.58333333	[0.02758621 0.07586207 0.13103448 0.04827586 0.08965517 0.16551724	2.2	0.610947	5.16599	0.610947	0.77353	Two_patches	Apple_juice	Anosmic	['0-10', '10-20', '20-30', '30-40', '40-50', '50-60', '60-70', '70-80', '80-90', '90-100']	238	5886	0.0404349	120.434	1320.51	535.089	1.57554	1.26667	105	42	0.0481002	0.0131306
															0.36842105 0.66666667 0.65 0.75 ]	0.13103448 0.16551724 0.13793103 0.02758621]
exp1_larva_9	0.553914	0.686189	0.436613	0.556982	0.191489	0.154639	0.477353	0.353069	0.873592	0.382137	9.1292	5.69833	10.5149	5.59268	[0. 0.57142857 0.88888889 0.46666667 0.52777778 0.54545455	[0.01986755 0.04635762 0.05960265 0.09933775 0.2384106 0.29139073	1.24739	1.32387	4.04122	1.32387	0.496963	Two_patches	Apple_juice	Anosmic	['0-10', '10-20', '20-30', '30-40', '40-50', '50-60', '60-70', '70-80', '80-90', '90-100']	401	5763	0.0695818		601.942	1235.7	1.8674	2.03226	48	104	0.118017	0.0200893
															0.7 0.83333333 0.66666667 0.8 ]	0.13245033 0.0397351 0.0397351 0.03311258]
exp2_larva_0	0.451973	0.561051	0.497707	0.586822	0.347826	-0.333333	0.558521	0.362706	0.611432	0.329575	10.1281	7.40856	7.40355	6.82362	[0. 0.4 0.65517241 0.61538462 0.71428571 0.	[0.01666667 0.125 0.24166667 0.21666667 0.05833333 0.025	2.32227				0.860529	Two_patches	Apple_juice	Anosmic	['0-10', '10-20', '20-30', '30-40', '40-50', '50-60', '60-70', '70-80', '80-90', '90-100']	222	5822	0.0381312	105.701	1336.54	245.49	1.48611	1	95	26	0.0427146	0.00808081
															0.33333333 0.8 1. 0. ]	0.175 0.125 0.01666667 0. ]
exp2_larva_1	0.52343	0.612389	0.594704	0.657979	0.72093		0.428022	0.275084	0.619752	0.40698	8.66927	5.03296			[0.8125 0.46428571 0.84848485 0.55 0.75 1.	[0.14953271 0.26168224 0.30841121 0.18691589 0.07476636 0.01869159	1.91151	0.49777	2.45283	0.49777	0.88923	Two_patches	Apple_juice	Anosmic	['0-10', '10-20', '20-30', '30-40', '40-50', '50-60', '60-70', '70-80', '80-90', '90-100']	356	5859	0.0607612	96.2036	1038.59	197.391	1.67961	1.42857	88	20	0.0664107	0.0126582
															0. 0. 0. 0. ]	0. 0. 0. 0. ]
exp2_larva_2	0.420286	0.562567	0.444635	0.544548	-0.247059	-0.153846	0.63465	0.401978	0.724884	0.390535	12.1529	5.86861	9.85144	5.38834	[1. 0.35714286 0.72 0.56521739 0.5625 0.36363636	[0.02797203 0.0979021 0.17482517 0.16083916 0.11188811 0.07692308	2.21423	0.554843	4.68182	0.554843	0.716534	Two_patches	Apple_juice	Anosmic	['0-10', '10-20', '20-30', '30-40', '40-50', '50-60', '60-70', '70-80', '80-90', '90-100']	141	5782	0.024386	117.177	1271.52	585.706	1.37931	1.16667	88	56	0.0289645	0.0113086
															0.38888889 0.88888889 0.33333333 1. ]	0.12587413 0.12587413 0.04195804 0.05594406]
exp2_larva_3	0.540144	0.648897	0.464036	0.578571	0.457143	0.55	0.447427	0.287467	0.630289	0.306872	9.58188	6.01985	8.48434	6.94326	[0.33333333 0.23529412 0.75757576 0.7 0.61904762 0.5	[0.02678571 0.15178571 0.29464286 0.08928571 0.1875 0.125	1.7547	1.02455	3.97172	1.02455	0.74325	Two_patches	Apple_juice	Anosmic	['0-10', '10-20', '20-30', '30-40', '40-50', '50-60', '60-70', '70-80', '80-90', '90-100']	263	5889	0.0446595	113.524	927.963	464.208	1.30233	1.44444	70	44	0.0511766	0.0240296
															0.71428571 0.75 0.5 1. ]	0.0625 0.03571429 0.01785714 0.00892857]
exp2_larva_4	0.504494	0.641229	0.417059	0.558791	0.373913		0.669719	0.466667	0.949964	0.401028	9.89199	6.64209			[0.28571429 0.875 0.5 0.66666667 0.27272727 0.57894737	[0.05384615 0.06153846 0.01538462 0.04615385 0.08461538 0.14615385	2.45993	0.451754	3.71429	0.451754	0.924664	Two_patches	Apple_juice	Anosmic	['0-10', '10-20', '20-30', '30-40', '40-50', '50-60', '60-70', '70-80', '80-90', '90-100']	433	5721	0.0756861	58.837	1623.06	203.767	1.56159	1	119	17	0.0814745	0.0028169
															0.4375 0.57894737 0.9 0.66666667]	0.24615385 0.14615385 0.15384615 0.04615385]
exp2_larva_5	0.496076	0.610962	0.510921	0.603782	-0.0114943		0.469197	0.306244	0.562061	0.309368	9.62141	5.18624			[0.375 0.64705882 0.83333333 0.41666667 0.71428571 0.28571429	[0.07207207 0.15315315 0.21621622 0.10810811 0.12612613 0.12612613	2.21436	0.3	1.1	0.3	0.860892	Two_patches	Apple_juice	Anosmic	['0-10', '10-20', '20-30', '30-40', '40-50', '50-60', '60-70', '70-80', '80-90', '90-100']	252	5830	0.0432247	95.433	1119.03	223.419	1.42604	1.1	88	24	0.0480175	0.011213
															0.75 1. 1. 0. ]	0.18018018 0.00900901 0.00900901 0. ]
exp2_larva_6	0.440879	0.53464	0.456801	0.568063	0.189873	0.0769231	0.542268	0.339292	0.607266	0.371898	11.2075	7.1701	10.7988	9.66804	[0.4 0.25 0.82142857 0.70588235 0.57142857 0.14285714	[0.04424779 0.17699115 0.24778761 0.15044248 0.0619469 0.0619469	2.33625	0.949682	2.52542	0.949682	0.798573	Two_patches	Apple_juice	Anosmic	['0-10', '10-20', '20-30', '30-40', '40-50', '50-60', '60-70', '70-80', '80-90', '90-100']	181	5605	0.0322926	86.287	1167.77	335.515	1.35345	1.09091	85	29	0.035076	0.015748
															0.625 0.90909091 1. 0. ]	0.14159292 0.09734513 0.01769912 0. ]
exp2_larva_7	0.508127	0.605726	0.417294	0.537211	0	0	0.547549	0.374452	0.736936	0.417274	11.2805	6.83133	16.3378	9.20048	[0.375 0.56521739 0.88235294 0.7 0.45454545 0.63636364	[0.0776699 0.22330097 0.16504854 0.09708738 0.10679612 0.10679612	1.9146	1.30219	2.50904	1.30219	0.709165	Two_patches	Apple_juice	Anosmic	['0-10', '10-20', '20-30', '30-40', '40-50', '50-60', '60-70', '70-80', '80-90', '90-100']	304	5914	0.0514034	287.307	1102.49	579.6	1.26984	4.23529	68	40	0.0381497	0.0797342
															0.5 0.5 0.6 1. ]	0.0776699 0.0776699 0.04854369 0.01941748]
exp2_larva_8	0.516699	0.624602	0.491354	0.591938	0.357143		0.368509	0.247066	0.618566	0.361223	13.0486	6.55922			[0.66666667 0.875 0.75 1. 0.77777778 0.63636364	[0.16216216 0.21621622 0.27027027 0.06756757 0.12162162 0.14864865	1.12808	1.48014	2.81132	1.48014	0.880729	Two_patches	Apple_juice	Anosmic	['0-10', '10-20', '20-30', '30-40', '40-50', '50-60', '60-70', '70-80', '80-90', '90-100']	464	5978	0.0776179		886.079	217.735	1.61922	1.125	56	19	0.0864198	0.0122449
															1. 0. 0. 0. ]	0.01351351 0. 0. 0. ]
exp2_larva_9	0.679295	0.752447	0.618884	0.752715	-0.2	0.172414	0.287193	0.180287	0.429595	0.306132	6.76041	5.12026	6.62062	4.68657	[0.58823529 0.58823529 0.83333333 0.66666667 0.5 0.46153846	[0.25 0.25 0.17647059 0.04411765 0.02941176 0.19117647	0.923136	1.67857	3.33224	1.67857	0.725559	Two_patches	Apple_juice	Anosmic	['0-10', '10-20', '20-30', '30-40', '40-50', '50-60', '60-70', '70-80', '80-90', '90-100']	695	5677	0.122424		509.768	306.301	1.72699	1.34694	38	31	0.136684	0.0701754
															0.75 0. 0. 0. ]	0.05882353 0. 0. 0. ]
exp3_larva_0	0.617498	0.698732	0.44848	0.556905	0.0877193		0.376039	0.324033	0.679201	0.441856	10.3103	6.84321			[0.33333333 0.46153846 0.76190476 0.875 0.33333333 0.71428571	[0.04 0.17333333 0.28 0.10666667 0.04 0.09333333	1.02085	0.868583	4.65278	0.868583	0.901749	Two_patches	Apple_juice	Anosmic	['0-10', '10-20', '20-30', '30-40', '40-50', '50-60', '60-70', '70-80', '80-90', '90-100']	676	5832	0.115912	74.324	863.197	188.478	1.55924	1.28571	59	17	0.125119	0.0242915
															0.5 1. 0.33333333 1. ]	0.13333333 0.06666667 0.04 0.02666667]
exp3_larva_1	0.610211	0.728915	0.532336	0.652879	0.6		0.340549	0.285853	0.446764	0.262361	12.7475	6.9935			[0.33333333 0.42857143 0.81818182 0.5 0.375 0.72727273	[0.06122449 0.14285714 0.2244898 0.08163265 0.16326531 0.2244898	0.836468	0.53301	2.01053	0.53301	0.903791	Two_patches	Apple_juice	Anosmic	['0-10', '10-20', '20-30', '30-40', '40-50', '50-60', '60-70', '70-80', '80-90', '90-100']	1190	5935	0.200505	55.1856	725.711	107.223	1.73344	2.45946	40	10	0.204884	0.143082
															1. 1. 0. 0. ]	0.08163265 0.02040816 0. 0. ]
exp3_larva_2	0.660226	0.736595	0.564652	0.648982	0.306122		0.307279	0.226776	0.47311	0.382347	9.74201	4.30826			[0.2 0.54166667 0.80952381 0.33333333 0.8 0.5	[0.07936508 0.38095238 0.33333333 0.04761905 0.07936508 0.06349206	0.971606	0.258966	0.0722892	0.258966	0.901133	Two_patches	Apple_juice	Anosmic	['0-10', '10-20', '20-30', '30-40', '40-50', '50-60', '60-70', '70-80', '80-90', '90-100']	713	5826	0.122382		702.44	126.557	1.39709	1.32258	51	13	0.128	0.0546667
															1. 0. 0. 0. ]	0.01587302 0. 0. 0. ]
exp3_larva_3	0.565402	0.628232	0.429885	0.557688	0.622642		0.373933	0.255702	0.582332	0.409806	11.5295	5.54869			[0.83333333 0.65217391 0.66666667 0.71428571 1. 1.	[0.08823529 0.33823529 0.26470588 0.10294118 0.04411765 0.02941176	1.27079	0.199826	0.958333	0.199826	0.905069	Two_patches	Apple_juice	Anosmic	['0-10', '10-20', '20-30', '30-40', '40-50', '50-60', '60-70', '70-80', '80-90', '90-100']	513	5583	0.0918861	79.0209	851.819	146.748	1.53628	1.3	57	12	0.0963784	0.0274551
															0.85714286 1. 0. 0. ]	0.10294118 0.02941176 0. 0. ]
exp3_larva_4	0.657568	0.726894	0.480359	0.631629	0.2		0.272707	0.149137	0.355375	0.210278	10.6583	6.99955			[0.71428571 0.47058824 0.8 1. 0. 0.	[0.1627907 0.39534884 0.34883721 0.09302326 0. 0.	0.758409				0.95453	Two_patches	Apple_juice	Anosmic	['0-10', '10-20', '20-30', '30-40', '40-50', '50-60', '60-70', '70-80', '80-90', '90-100']	985	5872	0.167745	57.4477	633.226	41.4012	1.77757	2.125	37	7	0.16967	0.0860759
															0. 0. 0. 0. ]	0. 0. 0. 0. ]
exp3_larva_5	0.579878	0.669735	0.362917	0.455135	-0.142857	-0.363636	0.383549	0.289095	0.767852	0.340376	16.7119	7.98317	14.9136	13.1545	[0.5 0. 0.86666667 0.6 0.25 0.4	[0.03333333 0.13333333 0.25 0.08333333 0.06666667 0.08333333	0.676023	0.756949	2.37135	0.756949	0.797256	Two_patches	Apple_juice	Anosmic	['0-10', '10-20', '20-30', '30-40', '40-50', '50-60', '60-70', '70-80', '80-90', '90-100']	570	5904	0.0965447	102.147	792.796	456.872	1.55096	1.16667	37	24	0.119609	0.00541377
															0.55555556 1. 1. 0. ]	0.15 0.13333333 0.06666667 0. ]
exp3_larva_6	0.554277	0.676943	0.532103	0.621101	-0.027027	-0.307692	0.355787	0.266138	0.515443	0.320198	14.0036	10.2609	9.3933	3.43897	[1. 0.33333333 0.75 0.75 0. 0.	[0.01538462 0.09230769 0.30769231 0.06153846 0. 0.	0.984164	1.16287	3.6447	1.16287	0.79929	Two_patches	Apple_juice	Anosmic	['0-10', '10-20', '20-30', '30-40', '40-50', '50-60', '60-70', '70-80', '80-90', '90-100']	561	5914	0.0948597	53.1293	748.041	294.576	1.37867	1.18919	39	27	0.109372	0.034564
															0.2 0.26666667 1. 0. ]	0.07692308 0.23076923 0.21538462 0. ]
exp3_larva_7	0.657104	0.724639	0.715189	0.752569	0.290323		0.283586	0.174392	0.271767	0.144892	10.6125	7.06563			[0.33333333 0.625 0.94444444 1. 0. 0.	[0.07692308 0.41025641 0.46153846 0.05128205 0. 0.	0.723812	0.461538	0.307692	0.461538	0.911693	Two_patches	Apple_juice	Anosmic	['0-10', '10-20', '20-30', '30-40', '40-50', '50-60', '60-70', '70-80', '80-90', '90-100']	731	5730	0.127574	49.5031	643.598	61.1476	1.36842	1.41026	33	7	0.129403	0.0708763
															0. 0. 0. 0. ]	0. 0. 0. 0. ]
exp3_larva_8	0.664207	0.733841	0.482988	0.570195	-0.027027	-0.372549	0.340236	0.275292	0.7478	0.373712	9.89476	6.24922	8.17962	7.61906	[0. 0.16666667 0.8125 0.53846154 0.625 0.22222222	[0. 0.06521739 0.17391304 0.14130435 0.17391304 0.09782609	1.06109	1.51697	4.27231	1.51697	0.702989	Two_patches	Apple_juice	Anosmic	['0-10', '10-20', '20-30', '30-40', '40-50', '50-60', '60-70', '70-80', '80-90', '90-100']	667	5754	0.115919	66.5726	579.252	625.909	1.49409	1.16667	40	53	0.156242	0.0179028
															0.57142857 0.46153846 0.75 0.75 ]	0.07608696 0.14130435 0.08695652 0.04347826]
exp3_larva_9	0.496351	0.608656	0.58467	0.712718	-0.373737		0.536182	0.37671	0.392218	0.361998	9.65457	5.62314			[0.25 0.92307692 0.875 1. 0.3 0.41935484	[0.07272727 0.11818182 0.07272727 0.01818182 0.09090909 0.28181818	2.70999	0.737162	0.60596	0.737162	0.871012	Two_patches	Apple_juice	Anosmic	['0-10', '10-20', '20-30', '30-40', '40-50', '50-60', '60-70', '70-80', '80-90', '90-100']	367	5830	0.0629503		1285.76	129.824	1.25339	1.38462	101	10	0.054549	0.0976139
															0.58333333 0.84615385 0. 1. ]	0.21818182 0.11818182 0. 0.00909091]
MEAN	0.536745	0.641443	0.475045	0.585409	0.162928	0.00625442	0.450965	0.308688	0.642173	0.355188	10.9939	6.70178	10.5449	7.12029			1.51574	0.932666	2.92603	0.932666	0.780519					476.138	5836.34	0.0815692	101.986	920.667	437.067	1.55256	1.54353	63.1379	36.1379	0.0938777	0.0350258
STD	0.0777765	0.0656407	0.0806012	0.071758	0.27152	0.266075	0.112799	0.0714171	0.161613	0.0639499	1.82696	1.29581	2.30844	2.20906			0.625503	0.45197	1.35026	0.45197	0.14389					251.386	101.817	0.042852	62.2198	282.005	369.919	0.210577	0.659428	25.1049	28.6365	0.0447072	0.0329884
N samples	29	29	29	29	29	18	29	29	29	29	29	29	18	18			29	27	27	27	29					29	29	29	24	29	29	29	29	29	29	29	29

## Sheet: Prob_turn_towards_center
					0-10	10-20	20-30	30-40	40-50	50-60	60-70	70-80	80-90	90-100
Nonnutrient	Agar	Sitter	exp1	L0	0	0.241379	0.528302	0.744681	0.722222	1	1
				L1		0		0.5	0.111111	0.454545	0.75	0.333333	0.4	0.5
				L2	0.666667	0.857143	0.529412	0.388889	0.666667	0.619048	0.75	1	0.625	0.714286
				L3		0.75	0.555556	0.692308	0.75	0.666667	0.636364	0.571429	0.571429	1
				L5	0.428571	0.692308	0.541667	0.4	0.681818	0.789474	0.941176	1
				L6	0.555556	0.666667	0.5	0.333333	0.4	1	1
				L7	0.428571	0.75	0.5	0.5	0.714286	0.428571	0.666667	1	0.25	0.5
				L8		1		0	0.2	0.461538	0.722222	0.416667	0.571429	0.769231
				L9		0.5	0.285714	0.571429	0.461538	0.666667	0.6	0.666667	0.727273	1
			exp2	L0	0.4	0.6	0.375	1		0.25	0.571429	0.363636	0.888889	1
				L1	0.5	0.533333	0.588235	0.307692	0.52	0.590909	0.653846	0.833333	0.666667	1
				L2	0.625	0.740741	0.722222	0.615385	0.692308	0.4	0.857143	1
				L3	0	0.684211
				L4	0.333333	0.777778	0.5	0.466667	0.777778	1
				L5	0.222222	0.833333	0.666667	0.555556	0.636364	0.333333	0.857143	0.666667	1
				L6	0.8	0.666667	0.666667	0.5	0.583333	0.363636	0.666667	0.777778	0.555556	0.8
				L7	0.333333	0.7	0.625	0.75	0.5	0.4	0.8125	0.5	0.857143	0.333333
				L8	0.428571	0.714286	1	0.5	0.666667	1	0.5	0		1
				L9	0.615385	0.896552	0.5	0.6	0.6	0.5	1	1	0	0
			exp3	L0					0	1	0	0.4	0.555556	0.571429
				L3	0.461538	0.727273	0.647059	0.608696	0.818182	0.833333	0.75
				L4	1	0.5	1	0.666667	1	0	1	1	1	0.666667
				L5		0.8	0.5625	0.833333	0.769231	0.9	0.875	1	1	1
				L7					0	0.333333	0.75	0.75	0.666667	0.666667
			mean		0.45875	0.665076	0.594421	0.549268	0.557796	0.608307	0.743643	0.698922	0.645975	0.720101
			STD		0.253769	0.216967	0.175202	0.209619	0.267212	0.288286	0.223005	0.30027	0.276834	0.291173
			N samples		17	22	19	21	22	23	22	19	16	16
	Gel	Sitter	exp1	L0	0	0.5	1	0	0.6	0.5	0.545455	0.8	0.5
				L1		0.333333	0.666667	0.428571	0.263158	0.6	0.730769	0.818182	1
				L2	0.666667	0.666667	1	0	0.666667	1	0.0714286	0.291667	0.655172	0.611111
				L3	0.571429	1	1	0.714286	0.5	0.55	0.714286	0.666667	0.5	0.5
				L4	0.7	0.5	0.666667	0.333333	0.714286	0.5	0.8	0.666667	0	0.545455
				L5		0	0.166667	0.666667	1	1		1		1
				L6			0	0	0	0.666667	1	1	0.25	0.5
				L7		0.2	1	0.333333	0.5	0.5	0.533333	0.416667	0.5	0.666667
				L8		0.166667	0.769231	0.2	0.529412	0.666667	0.714286	0.333333	1	0.833333
				L9	0.6	0.833333	1	1	0.25	0.45	0.444444	0.538462	0.6	0.85
			exp2	L0	0.2	0.833333	0.5	0.533333	0.714286	0.611111	0.75	0.5
				L3	0.5	0.75	0.5	0.25	0.363636	0.7	0.555556	0.411765	0.666667	0.535714
				L4			0	1	0.470588	0.666667	0.444444	0.571429	0.75	0.5
				L6	0.740741	1	0.75	1	0.8	1			1	0
				L8		0.5	1	0	0.5	0.5	0.5	0.6	1	0.5
			exp3	L0		0	0	0.272727	0.722222	0.461538	0.647059	0.928571	1	1
				L1			0	0.888889	0.85	0.789474	0.642857	0.727273	0.444444	0.6
				L2	0.8	0.666667	0.357143	0.519231	0.594595	0.785714	0.833333	1	1
				L3	0	0.6	0.25	0.520833	0.897436	0.541667	0.580645	0.846154	0.75	1
				L4				1	0.666667	0.666667	0.333333	0.5	0.5	0.666667
				L5	0.25	0.875	0	0.666667	0.933333	0.777778	0.25	0.8	1	0
				L6	0.857143	0.8	0.666667		0.666667	1
				L7		1		0.153846	0.434783	0.684211	0.736842	0.818182	0.714286	0.166667
				L8	0.5	1	0.428571	0.888889	0.928571	0.833333	0.75	0.666667	0.2	0.5
				L9				0.1875	0.676471	0.6	0.285714	0.222222	0.857143
				L10	0.5	1	0	0.526316	0.785714	0.785714	1	0.375	0.666667	0.5
				L11	1	0.5625	0.5	0.62069	0.8	0.666667	0.583333	1	0.5	1
			mean		0.525732	0.626705	0.509234	0.488658	0.623277	0.685329	0.601963	0.659956	0.668932	0.594077
			STD		0.298921	0.324442	0.385351	0.340591	0.233784	0.171122	0.225115	0.239495	0.284282	0.294967
			N samples		15	22	24	26	27	27	24	25	24	21
Two	Sucrose	Rover	exp1	L0	0.333333	0.461538	0.653846	0.826087	0.714286	0.909091	0.8	0.4	1	1
				L1	0.5	0.625	0.75	0.666667	1	0.666667	0.75	0.555556	1	1
				L2	0	0.473684	0.769231	0.722222	0.615385	0.571429	0.769231	0.6	0.25	0.714286
				L3	0.4	0.615385	0.735294	0.666667	0.6	0.666667	0.6	1	1
				L4	0.857143	0.458333	0.69697	0.733333	0.65	0.764706	0.857143	1	1
				L5	0.666667	0.375	0.821429	0.5	0.461538	0.666667	0.62069	0.818182	1
				L6	0.615385	0.633333	0.730769	0.571429	0.384615	0.444444	0.47619	0.666667	0.909091	1
				L7	0.375	0.541667	0.823529	0.764706	0.555556	0.5	1	0.4	0.714286	0.5
				L8	1	0.2	0.608696	0.5	0.6	0.6	0.555556	0.428571	0.777778	0.6
				L9	0.4	0.411765	0.68	0.625	0.55	0.375	0.6	0.4	0.571429	0.666667
			exp2	L0	0.631579	0.613636	0.62963	1
				L1	0.714286	0.5	0.6	1	0.75		0.5	1	0.5
				L2	0.5625	0.666667	0.56	0.8125	0.5	0.75	1		1
				L3	1	0.454545	0.909091	1	0
				L4	0.6	0.62963	0.590909	0.75	0.833333	1	1	0	1	0
			mean		0.577059	0.510679	0.70396	0.742574	0.586765	0.659556	0.732985	0.605748	0.824814	0.685119
			STD		0.263237	0.126384	0.100108	0.165623	0.230439	0.181302	0.190413	0.307928	0.247737	0.340072
			N samples		15	15	15	15	14	12	13	12	13	8
		Sitter	exp1	L0	0.571429	0.818182	0.387097	0.8125	0.583333	1	0	1	0
				L1	0.7	0.678571	0.766667	1	1	0.5	1		0.25	1
				L2	0.666667	0.733333	0.882353	0.555556	0.5	0.5	0.5	1	1	0
				L3	0.666667	1	0.363636	0.727273	0	0.0833333	0.684211	0.666667	0.541667	0.857143
				L4						1	0	0.466667	0.5	0.75
				L5	0.833333	0.5	0.888889	1			0
				L6	0.857143	0.653061	0.965517	0.9	0.571429	0.666667	0.5	0.857143	1	1
				L7	0.8	0.76	0.769231	0.777778	0.666667		1	0	1
				L8	0.6	0.307692	0.705882	0.666667	0.714286	0.285714	0.6	0.75	0.8	1
				L9	0.571429	0.75	0.861111	0.666667	0.666667	0.666667	0.666667	1
			exp2	L0	0.777778	0.777778	0.8	0.666667	0.5	0.5	0.6	0.75	0.25	0.5
				L1	0.666667	0.733333	0.428571	0.76	0.833333	0.333333	1	0	1
				L2	0.666667	0.666667	0.75	0.75	0.333333		0		1	0.5
				L3	0.8	0.5	0.888889	0.166667	0.6875	0.722222	0.75	0.75	1
				L4	0.75	0.714286	1			1		1		0.75
			mean		0.709127	0.685207	0.746989	0.726906	0.588046	0.604828	0.521491	0.686706	0.695139	0.706349
			STD		0.0950144	0.164821	0.208778	0.213069	0.251277	0.297012	0.381066	0.360004	0.370477	0.329646
			N samples		14	14	14	13	12	12	14	12	12	9
		Anosmic	exp1	L0		0	0.5	1	0.2	0.5	0.545455	0.636364	0.4	0.611111
				L1	0	0.5	0.791667	0.6	0.166667	0.390244	0.68	0.555556
				L2	0.5	0.428571	0.833333	0.666667	0.4	0.1	0.888889	0.384615	0.75	1
				L3	0.8	0.4	1	0.4	0.384615	0.533333	0.545455	0.5	0.571429	1
				L4	0.6	0.666667	0.695652	0.714286	0.833333	0.5	0.285714	0.666667	0.333333	1
				L5	0.375	0.642857	0.75	0.777778	1
				L6			0.2	0	0.666667	0.5	0.454545	0.833333	0	0.5
				L8	0.25	0.6	0.75	0.428571	0.375	0.666667	0.368421	0.538462	1	0.666667
				L9				0	0.5	0.222222	0.666667	0.461538	0.75	0.777778
			exp2	L0	0.666667	0.625	0.818182	0.285714	0.571429	0.8	0.333333	0	0.75	0.75
				L1	0.5	0.69697	1	0	1		0.5	0	0.5	0.666667
				L2	0.5	0.666667	0.666667		1		1	0.5
				L4	0.428571	0.714286	0.96	0	0.75	0.666667	0.666667	0.7	0.571429	0.8
				L5	0.375	0.666667	0.7	1	0	0	1
				L6	0.285714	0.533333	0.75	1	1	0.5	0	1		0.5
				L7	0.125	0.65	0.666667	0	1	0.333333	0.75	0.5	0.75	0.5
				L8	0.769231	0.611111	0.857143	1	0.666667	0.666667	1	0		0.2
				L9	0.5	0.333333	0.833333	1	1	1	1	0.5		0.666667
			exp3	L0	0.333333	0.666667	0.6	0.625	0.333333	1	0.5	0.6	0.4	0.75
				L2			0.666667	0.5	0	0.333333	0.4	0.5	1	0
				L3	0.7	0.6	0.681818	0.461538	1	0.333333	0.692308	0.833333	0	1
				L4	0	0.666667	0.714286	0.416667	0.714286	0.75	1		1
				L5	0.615385	1	0.461538	0.625	0.25	1		0	1	1
				L6	0.25	0.545455	0.916667	1	0.666667	1	0.666667	0.428571	1	0.5
				L7			0.5	1				0	0.666667	0.5
				L8	1	0.25	0.909091	0.285714	0.833333		0	0.347826	0.666667	0.8
				L9						1			0.333333	0.4
			mean		0.4559	0.566557	0.728908	0.551477	0.61248	0.581627	0.606266	0.455925	0.622143	0.663131
			STD		0.25869	0.198276	0.183512	0.367493	0.334359	0.3026	0.29878	0.287745	0.311443	0.266581
			N samples		21	22	25	25	25	22	23	23	20	22
	Yeast	Rover	exp1	L0	0.625	0.517241	0.7	0.714286	0.4	0.818182
				L1	0.568182	0.602273	0.654545	0.666667
				L2	0	0.25	0.675	1
				L4	0.277778	0.571429	0.782609
				L5	0.551724	0.54386	0.697674	0.72
				L6	0.5	0.363636	0.535714	0.645161	0.666667
				L7	0.782609	0.76	0.418605	0.909091
				L8	0.5	0.878788	1
				L9	0.571429	0.529412	0.666667
				L10	0.428571	0.47619	0.603448	0.714286	0.6	1
			exp2	L0	0.333333	0.454545	0.857143	0.666667	1	0.333333	0.583333	0.5
				L2		0.384615	0.666667	1	0.75		0.5
				L3	1	0.428571	0.75	0	1	0	0.5	0.571429	1	0
				L4	0.6	0.76	0.607143	0.576923	0.5	0.52381	0.5625	0.571429
				L5	0	0.5	0.62069	0.875	0.461538	0.73913
				L6	0.4	0.541667	0.666667	0.75	0.4375	0.666667
				L8	0.444444	0.387097	0.638889	0.529412	0.714286	0.611111	0.75	0.666667	0.333333	0.571429
				L9	0	0.446429	0.75	0.578947	0.714286	1
			exp3	L0	0	0.5	0.454545	0.6875	0.5	1	0.666667	0
				L1	0.444444	0.647059	0.688889	0.741935	1	0
				L2	0.375	0.617021	0.593023	0.8
				L3	0.473684	0.5	0.702128	0.56	0.692308
				L4		0.1875	0.69697	0.555556	0.6	0.25	0.7	0.555556	0.5	0.473684
				L5	0.5	0.5	0.557692	0.6	0.4	1
				L6	0.416667	0.5	0.5	0.625	0.5	0.5	0.6	0
				L7	0.4	0.5625	0.533333	1
				L8	0.333333	0.5	0.578947	0.666667	0.388889	0.833333
				L9	0.4	0.678571	0.607843	0.611111	1	1
			mean		0.420238	0.521014	0.650173	0.687768	0.648709	0.642223	0.607812	0.409297	0.611111	0.348371
			STD		0.234263	0.145708	0.118662	0.201563	0.218156	0.348986	0.0911358	0.283866	0.346944	0.305631
			N samples		26	28	28	25	19	16	8	7	3	3
		Sitter	exp1	L0		0.416667	0.52381	0.56	0.5625	0.611111	0.727273	0.428571	1
				L1	0	0.346154	0.741935	1
				L2	0	0.428571	0.733333	1
				L4	0.333333	0.574468	0.636364	0.666667	0.6	0.333333	0.5	1
				L5		0.16	0.659091	0.8	0.5	0
				L6		0.307692	0.724138	0.545455
				L8	0.692308	0.388889	0.603774	0.529412	0.5	0.65
				L9		0.3	0.382353	0.862069	0	0.555556	1
			exp2	L2	0.4	0.56	0.709677	0.769231	1
				L3	0.5	0.5	0.75	0.466667	0.727273	0.333333
				L4	0.545455	0.607143	0.555556	1
				L5	0	0.466667	0.714286	1
				L6	0.375	0.529412	0.666667	1
				L7	0.3	0.529412	0.612903	0.8	1		0.666667	0.666667	0.444444	0.5
				L8	0.428571	0.565217	0.666667	0.75	0.545455
				L9	0	0.529412	0.818182
			exp3	L0
				L1		0.4	0.666667	0.454545	0.333333	0.411765	0.666667	0.666667	0	0.285714
				L2	0.5	0.611111	0.619048
				L3	0.25	0.533333	0.5	0	0.6	0.588235	0.333333	0.375	0.272727	0.44
				L5	0.25	0.636364	0.583333
				L7	0.25	0.5	0.575758	0.545455
				L9	0.333333	0.434783	0.588235	1
			mean		0.303412	0.469332	0.637808	0.723658	0.57896	0.435417	0.64899	0.627381	0.429293	0.408571
			STD		0.208542	0.118491	0.0980585	0.267208	0.280503	0.215702	0.22441	0.247565	0.422193	0.110546
			N samples		17	22	22	19	11	8	6	5	4	3
		Anosmic	exp1	L0				0.333333	0	0.6	0.6	0.615385	0.285714	0.8
				L1		0.333333	0.333333	0.5	0.166667	0.333333	0.52381	0.541667	0.333333	0.758621
				L4	0.666667	0.666667	0.666667	0.473684	0.5	0	0.333333	0.285714	0.222222	0.461538
				L6		0	0.4	0.333333	0.666667	0	0.5	0.3	0.777778	0.444444
				L8		0.5	0.4	0.8	0		0.5	0.5	0.416667	0.8
			exp2	L0		0.5	0.5	0.428571	0.666667	0.833333	0.75	0.333333	0.666667	0.571429
				L1	1	1	1	0	0.333333	0.5	0.666667	0.333333	0.5	0.8
				L2		0.4	0.375	0.631579	0.348837	0.604167	0.733333	0.375	0.565217	0.85
				L3	0.6	0.333333	0.545455	0.869565	0.6	0.375	0.625	0.75	0.25	0.666667
				L4	0.8	0.714286	0.833333		1	0.428571	1	0.5	0.5	0
				L6	0.6	0.592593	0.6	0.571429	0.384615	0.380952	0.571429	0.6	0.555556	0.333333
				L7			0	0.333333	0	1	0.5	0.5	0.4	0.75
				L8		0.2	0.583333	1	0.333333	0.4	0.56	0.681818	0.44	0.636364
				L9		0	0.6		0	1	0.428571	0.666667	1	0
			exp3	L0					0	0.4	0.714286	0.733333	0.666667	0.4
				L1	0	0.777778	0.5	0.75	0.8
				L2	0.4	0.714286	1
				L3		0.5	0.25	0.9	1	0	0.714286	0.4	0.545455	0.5
				L4				0.4	0.6	0.285714	0.25	0.333333	0.454545	0.756757
				L7	0	0.5	0.25	0.6	0	0.666667	0.333333	0.833333
				L8	0	0.2	0.666667	0.166667	0.5	0.526316	0.909091	0.5	0.333333	0.461538
				L9		0		1	0.4	0.666667	0.333333	0.5	1	0.3
				L10				0	1	0.25	1	0	0.5	0.5
			mean		0.451852	0.440682	0.527988	0.531131	0.422733	0.462536	0.597451	0.489663	0.520658	0.539535
			STD		0.375319	0.285695	0.256673	0.304897	0.344829	0.290302	0.210987	0.194496	0.21732	0.250457
			N samples		9	18	18	19	22	20	21	21	20	20
	Apple_juice	Rover	exp1	L0	0.333333	0.583333	0.724138	1
				L1	0.428571	0.428571	0.777778	0.722222	1
				L2	0.555556	0.5	0.4	0.666667	0.222222	0.5	0.62963	0.642857	1	1
				L3	0.333333	0.666667	0.631579	1	1
				L4	0.5	0.684211	0.7	1
				L5	0.5	0.708333	0.8	0.9375	0.6	0.8
				L6	0.333333	0.5625	0.538462	0.8	1
				L7	0.6	0.545455	0.344828	0.588235	0.351351	0.78125	0.75
				L8	0.666667	0.461538	0.52	0.666667	0.625		0.5	1		0
				L9	0.333333	0.833333	0.5	0.777778	0
			exp2	L0	0.571429	0.857143	0.823529	0.833333	0.7	1	0.4	0.857143	0.333333	0.75
				L1		0	0.666667	0.5	0.25	0.7	0.5	0.4	0.666667	0.625
				L2	0	0.6	0.766667	0.916667
				L3	0.285714	0.409091	0.714286	0.642857	0.142857	0.571429	0.857143	1	0.666667
				L4	0.571429	0.333333	0.625	0.894737	0.5	1
				L5		0.333333	0.722222	0.92	1	0.5	0	0.571429	1
				L6	0.75	0.611111	0.575758	0.857143	1	0	1	1
				L7	0.818182	0.789474	0.892857	0.636364	0.5	0.25	0.5	1	0.4	1
				L8	0.375	0.555556	0.82	0.923077		0	1	0.5
				L9	0.75	0.25	0.818182	0.9375	1	0	0.5	0	0.666667	0.5
			exp3	L0	0.6	0.411765	0.8	0.642857	0.428571	0.5	0.545455	0.833333	1
				L1	0.444444	0.473684	0.78	0.944444
				L2	0.833333	0.6	0.730769	0.8	0.555556	1	1
				L3	0.6	0.481481	0.714286	0.916667
				L4	0.5	0.764706	0.333333	0.515152	0.722222	1
				L5	0.375	0.428571	0.903226	0.875	1
				L6	0.5	0.458333	0.775	0.928571	0.666667				1
				L7	0.25	0.25	0.6	0.478261	0.363636	0.9	0.8	1	1
				L8	0.4	0.4	0.589744	0.708333	0.8	1
				L9	0.5	0.6	0.666667	0.714286	0.714286	0.8			1
			mean		0.489595	0.519384	0.675166	0.791477	0.630932	0.627927	0.641588	0.73373	0.793939	0.645833
			STD		0.185028	0.187155	0.149456	0.157818	0.308105	0.362356	0.281242	0.318892	0.25898	0.374305
			N samples		28	30	30	30	24	18	14	12	11	6
		Sitter	exp1	L0	0.75	0.9	0.6	0.8	0	0.5	1	1	1	1
				L1	0.5	0.652174	0.857143	0.875	1
				L2	0.666667	0.892857	0.886792	1
				L3	0.615385	0.617647	0.818182	1
				L4	0.142857	0.636364	0.818182	1
				L5		0.142857	0.625	1	0.333333	0.5	0.666667	0.272727	0.214286	0.571429
				L6	0.333333	0.653846	0.75	0.904762	1	0	1	1
				L7	0.75	0.935484	0.888889	1	1
				L8	0.333333	0.421053	0.714286	0.761905	0.75	0.666667		1
				L9	0.25	0.4375	0.612903	0.954545
			exp2	L0	0.625	0.578947	0.75	1
				L1	1	0.5	0.705882	0.333333	0.428571	0.6	0.727273	0.6	0.666667	1
				L2		0.7	0.875	0.555556	1	0.666667	1	0.666667	1	1
				L3	1	0.466667	0.695652	0.705882	0.2	0.6875	1	1
				L4	0	0.590909	0.769231	1
				L5	0.888889	0.769231	0.5	0.714286	0.75	0.4	1	1
				L6	0.666667	0.466667	0.5	0.619048	0.666667	1
				L7	0.5	0.652174	0.3	0.695652	1	1
				L8	0	0.9	0.625	0.8	0.5	0.5	1	0.4	1	0.333333
				L9	0.736842	0.888889	0.75	0.75
			exp3	L0	0.4	0.541667	0.722222	0.666667	1
				L1	0.777778	0.642857	1
				L2	0.777778	0.416667	0.619048	1
				L3	0.625	0.529412	0.85	1
				L4	0.571429	0.6	0.730769	1
				L5	0.666667	0.5	0.5	0.294118	0.866667	1	1		1
				L6	0	0.777778	0.7	0.769231
				L7	0	0.5	0.545455	0.8	0.8	1
				L8	0.5	0.692308	0.666667	0.428571	0.888889	1	0.5		1	1
				L9	0	0.727273	0.7	0.5	0.428571	0.416667	0.714286	1
			mean		0.502772	0.624374	0.702543	0.79064	0.700705	0.6625	0.873475	0.793939	0.840136	0.81746
			STD		0.311807	0.178713	0.146276	0.213965	0.314488	0.295389	0.18467	0.285857	0.302645	0.292641
			N samples		28	30	30	29	18	15	11	10	7	6
		Anosmic	exp1	L0	0	0.333333	0.870968	0.7	0.6	1
				L1	0	0.8	0.769231	0.388889	0.384615	0.692308	0.636364	0.727273	1	0.666667
				L2	0.363636	0.65	0.885714	0.666667	0.285714	0.7	0.230769	0.5	1
				L3	0	0.444444	0.642857	0.666667	0.6	0.5	0.4	0.625
				L5	1	0.5	0.769231	0.318182	0.551724	0.6	0.538462	0.722222	0.875	1
				L6	0	0.444444	0.730769	0.461538	0.6	0.833333	0.571429	0.8		1
				L7		0	1	0	0.210526	0.666667	0.642857	0.142857	0.4	0.722222
				L8	0.75	0.363636	0.684211	0.714286	0.538462	0.583333	0.368421	0.666667	0.65	0.75
				L9	0	0.571429	0.888889	0.466667	0.527778	0.545455	0.7	0.833333	0.666667	0.8
			exp2	L0	0	0.4	0.655172	0.615385	0.714286	0	0.333333	0.8	1
				L1	0.8125	0.464286	0.848485	0.55	0.75	1
				L2	1	0.357143	0.72	0.565217	0.5625	0.363636	0.388889	0.888889	0.333333	1
				L3	0.333333	0.235294	0.757576	0.7	0.619048	0.5	0.714286	0.75	0.5	1
				L4	0.285714	0.875	0.5	0.666667	0.272727	0.578947	0.4375	0.578947	0.9	0.666667
				L5	0.375	0.647059	0.833333	0.416667	0.714286	0.285714	0.75	1	1
				L6	0.4	0.25	0.821429	0.705882	0.571429	0.142857	0.625	0.909091	1
				L7	0.375	0.565217	0.882353	0.7	0.454545	0.636364	0.5	0.5	0.6	1
				L8	0.666667	0.875	0.75	1	0.777778	0.636364	1
				L9	0.588235	0.588235	0.833333	0.666667	0.5	0.461538	0.75
			exp3	L0	0.333333	0.461538	0.761905	0.875	0.333333	0.714286	0.5	1	0.333333	1
				L1	0.333333	0.428571	0.818182	0.5	0.375	0.727273	1	1
				L2	0.2	0.541667	0.809524	0.333333	0.8	0.5	1
				L3	0.833333	0.652174	0.666667	0.714286	1	1	0.857143	1
				L4	0.714286	0.470588	0.8	1
				L5	0.5	0	0.866667	0.6	0.25	0.4	0.555556	1	1
				L6	1	0.333333	0.75	0.75			0.2	0.266667	1
				L7	0.333333	0.625	0.944444	1
				L8		0.166667	0.8125	0.538462	0.625	0.222222	0.571429	0.461538	0.75	0.75
				L9	0.25	0.923077	0.875	1	0.3	0.419355	0.583333	0.846154		1
			mean		0.423989	0.481625	0.791325	0.630361	0.535337	0.565756	0.594191	0.72812	0.765196	0.873504
			STD		0.329109	0.231869	0.101703	0.226771	0.19549	0.249051	0.221439	0.242145	0.255363	0.146164
			N samples		27	29	29	29	26	26	25	22	17	13
