# Supplementary material for: Adaptation of Drosophila larva foraging in response to changes in food resources
Source: eLife. 2022 Dec 2;11:e75826. doi: 10.7554/eLife.75826 (PMC9822246; doi:10.7554/eLife.75826)
Supplement: Source data 2. [file elife-75826-data2.xlsx]

## Sheet: rover_Eight_patches_Yeast
ID	ratio_in_out	env	substrate	larva_type	number_visited_patches
exp1_larva_0	0.49722	Eight_patches	Yeast	Rover	2
exp1_larva_1	0.836235	Eight_patches	Yeast	Rover	1
exp1_larva_2	0.444144	Eight_patches	Yeast	Rover	4
exp1_larva_3	0.484522	Eight_patches	Yeast	Rover	2
exp1_larva_4	0.619575	Eight_patches	Yeast	Rover	1
exp1_larva_5	0.449749	Eight_patches	Yeast	Rover	1
exp1_larva_6	0.864121	Eight_patches	Yeast	Rover	2
exp1_larva_7	0.462134	Eight_patches	Yeast	Rover	2
exp2_larva_0	0.633357	Eight_patches	Yeast	Rover	1
exp2_larva_1	0.408075	Eight_patches	Yeast	Rover	2
exp2_larva_2	0.172641	Eight_patches	Yeast	Rover	2
exp2_larva_3	0.45614	Eight_patches	Yeast	Rover	2
exp2_larva_4	0.55106	Eight_patches	Yeast	Rover	1
exp2_larva_5	0.540665	Eight_patches	Yeast	Rover	2
exp2_larva_6	0.433466	Eight_patches	Yeast	Rover	3
exp2_larva_7	0.198641	Eight_patches	Yeast	Rover	4
exp2_larva_8	0.559423	Eight_patches	Yeast	Rover	2
exp3_larva_0	0.722574	Eight_patches	Yeast	Rover	1
exp3_larva_1	0.809603	Eight_patches	Yeast	Rover	1
exp3_larva_2	0.64134	Eight_patches	Yeast	Rover	2
exp3_larva_3	0.932144	Eight_patches	Yeast	Rover	1
exp3_larva_4	0.403218	Eight_patches	Yeast	Rover	1
exp3_larva_5	0.224949	Eight_patches	Yeast	Rover	1
exp3_larva_6	0.597009	Eight_patches	Yeast	Rover	2
exp3_larva_8	0.740308	Eight_patches	Yeast	Rover	1

## Sheet: sitter_Eight-patches_yeast
ID	ratio_in_out	env	substrate	larva_type	number_visited_patches
exp1_larva_0	0.10757	Eight_patches	Yeast	Sitter	1
exp1_larva_1	0.332921	Eight_patches	Yeast	Sitter	1
exp1_larva_2	0.57126	Eight_patches	Yeast	Sitter	2
exp1_larva_3	0.480134	Eight_patches	Yeast	Sitter	1
exp1_larva_4	0.588078	Eight_patches	Yeast	Sitter	2
exp1_larva_5	0.951703	Eight_patches	Yeast	Sitter	1
exp1_larva_6	0.132379	Eight_patches	Yeast	Sitter	2
exp2_larva_1	0.223047	Eight_patches	Yeast	Sitter	1
exp2_larva_2	0.551124	Eight_patches	Yeast	Sitter	1
exp2_larva_3	0.589413	Eight_patches	Yeast	Sitter	4
exp2_larva_4	0.567753	Eight_patches	Yeast	Sitter	2
exp2_larva_5	0.017681	Eight_patches	Yeast	Sitter	1
exp2_larva_6	0.646734	Eight_patches	Yeast	Sitter	4
exp2_larva_7	0.453394	Eight_patches	Yeast	Sitter	1
exp3_larva_0	0.214543	Eight_patches	Yeast	Sitter	1
exp3_larva_2	0.723316	Eight_patches	Yeast	Sitter	3
exp3_larva_3	0.726242	Eight_patches	Yeast	Sitter	2
exp3_larva_4	0.143881	Eight_patches	Yeast	Sitter	1
exp3_larva_6	0.647072	Eight_patches	Yeast	Sitter	2
exp3_larva_7	0.648128	Eight_patches	Yeast	Sitter	1
exp3_larva_8	0.00565327	Eight_patches	Yeast	Sitter	1

## Sheet: rover_Eight_patches_Sucrose
ID	ratio_in_out	env	substrate	larva_type	number_visited_patches
exp1_larva_0	0.0393596	Eight_patches	Sucrose	Rover	2
exp1_larva_1	0.00869274	Eight_patches	Sucrose	Rover	1
exp1_larva_2	0.0509598	Eight_patches	Sucrose	Rover	1
exp1_larva_3	0	Eight_patches	Sucrose	Rover	0
exp1_larva_4	0.0669625	Eight_patches	Sucrose	Rover	2
exp1_larva_5	0.0464505	Eight_patches	Sucrose	Rover	2
exp1_larva_6	0	Eight_patches	Sucrose	Rover	0
exp1_larva_7	0.215287	Eight_patches	Sucrose	Rover	3
exp2_larva_0	0.440672	Eight_patches	Sucrose	Rover	4
exp2_larva_1	0.230811	Eight_patches	Sucrose	Rover	2
exp2_larva_2	0.371614	Eight_patches	Sucrose	Rover	1
exp2_larva_3	0.21057	Eight_patches	Sucrose	Rover	2
exp2_larva_6	0.316003	Eight_patches	Sucrose	Rover	4
exp3_larva_0	0.115793	Eight_patches	Sucrose	Rover	2
exp3_larva_2	0.107333	Eight_patches	Sucrose	Rover	3
exp3_larva_3	0.0457243	Eight_patches	Sucrose	Rover	2
exp3_larva_4	0.116889	Eight_patches	Sucrose	Rover	3
exp3_larva_6	0.130408	Eight_patches	Sucrose	Rover	2
exp3_larva_7	0.0419291	Eight_patches	Sucrose	Rover	2

## Sheet: Sheet3
ID	ratio_in_out	env	substrate	larva_type	number_visited_patches
exp1_larva_1	0.529333	Eight_patches	Sucrose	Sitter	1
exp1_larva_2	0.116407	Eight_patches	Sucrose	Sitter	2
exp1_larva_3	0.0892857	Eight_patches	Sucrose	Sitter	2
exp1_larva_4	0.571198	Eight_patches	Sucrose	Sitter	1
exp1_larva_5	0.473737	Eight_patches	Sucrose	Sitter	3
exp1_larva_6	0.490997	Eight_patches	Sucrose	Sitter	2
exp1_larva_7	0.48964	Eight_patches	Sucrose	Sitter	1
exp2_larva_1	0.0897196	Eight_patches	Sucrose	Sitter	2
exp2_larva_4	0.579832	Eight_patches	Sucrose	Sitter	2
exp2_larva_6	0.0337781	Eight_patches	Sucrose	Sitter	1
exp2_larva_7	0.375902	Eight_patches	Sucrose	Sitter	1
exp3_larva_1	0.225986	Eight_patches	Sucrose	Sitter	2
exp3_larva_2	0.262179	Eight_patches	Sucrose	Sitter	3
exp3_larva_3	0.11191	Eight_patches	Sucrose	Sitter	2
exp3_larva_5	0.134472	Eight_patches	Sucrose	Sitter	4
exp3_larva_6	0.2732	Eight_patches	Sucrose	Sitter	2
exp3_larva_7	0.279081	Eight_patches	Sucrose	Sitter	1
