# Supplementary figures and images for: Adaptation of Drosophila larva foraging in response to changes in food resources
Source: eLife journal article supplement (doi:10.7554/elife.75826), 2022-12-02

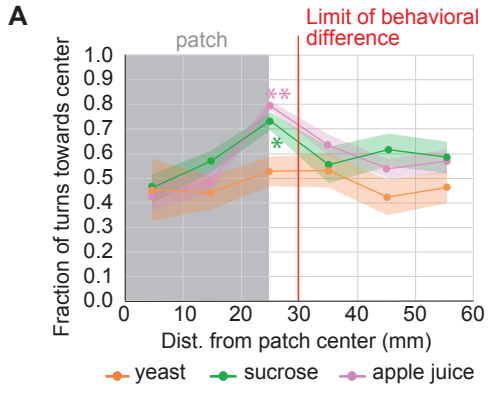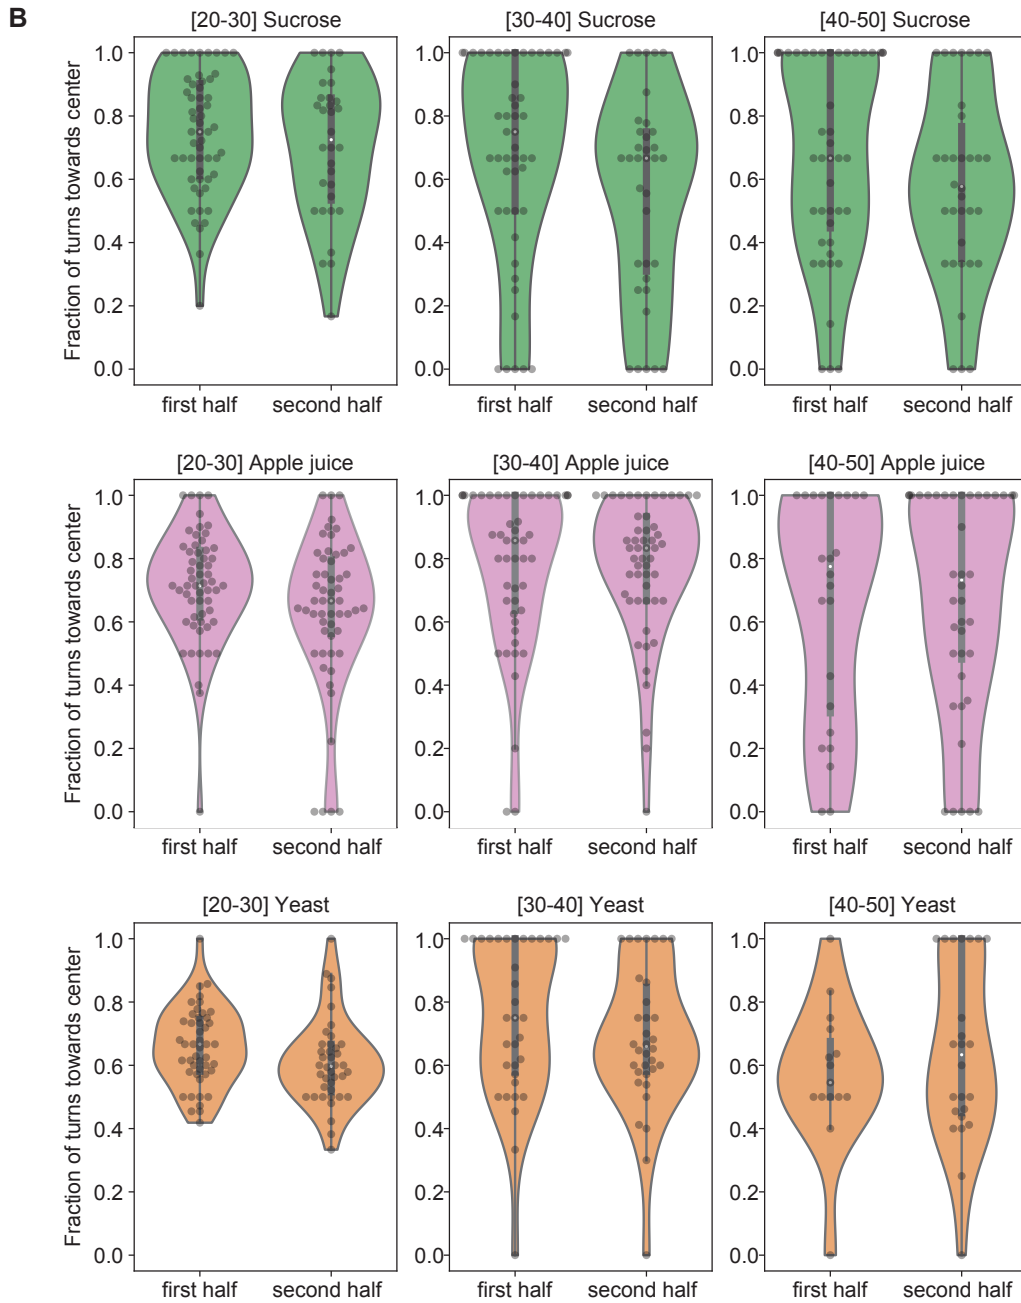

Supplement: supp [file elife-75826-supp-v1.zip]

**A**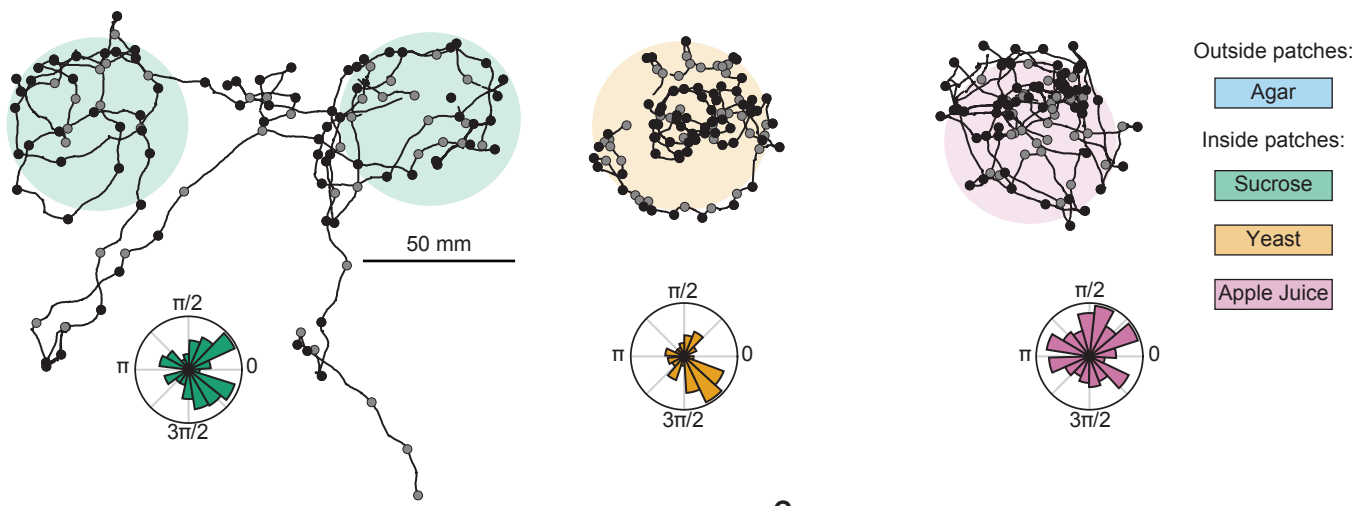**B**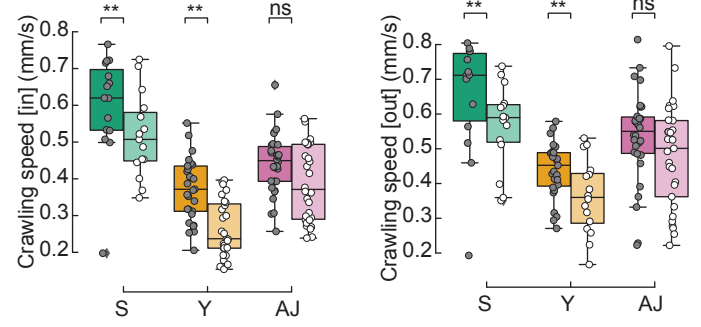**C**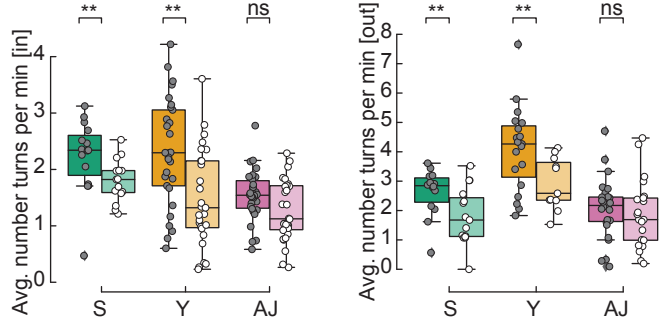**D**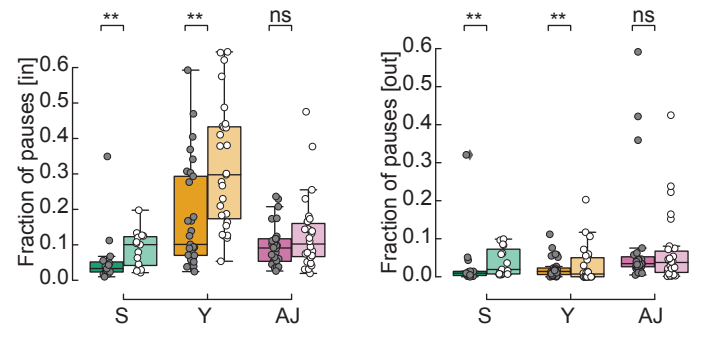**E**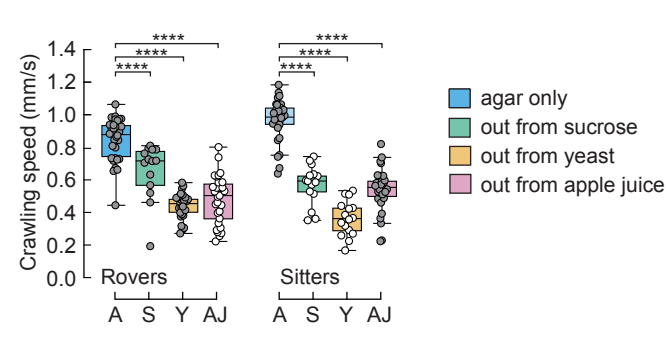**F**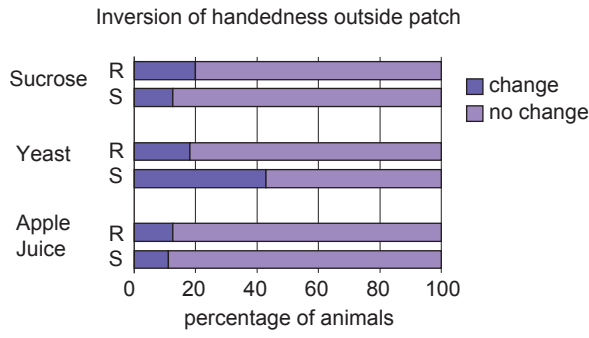

Supplement: supp [file elife-75826-supp-v1.zip]

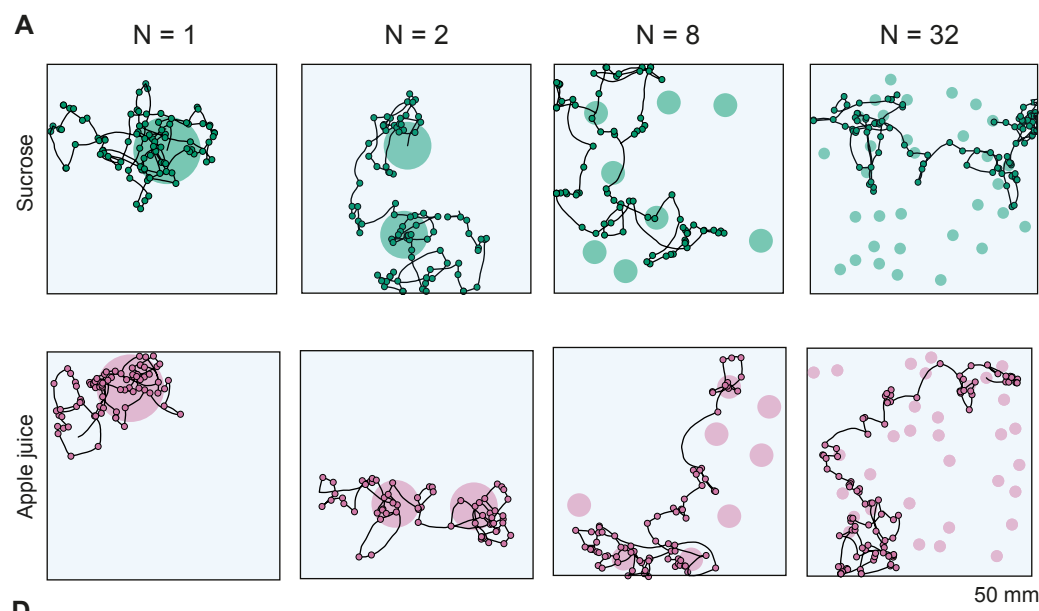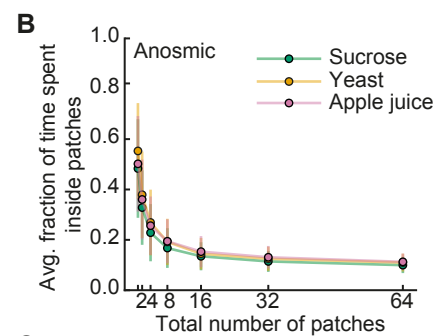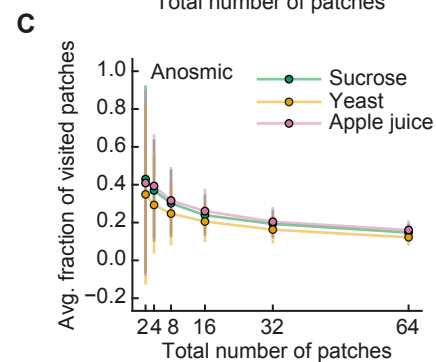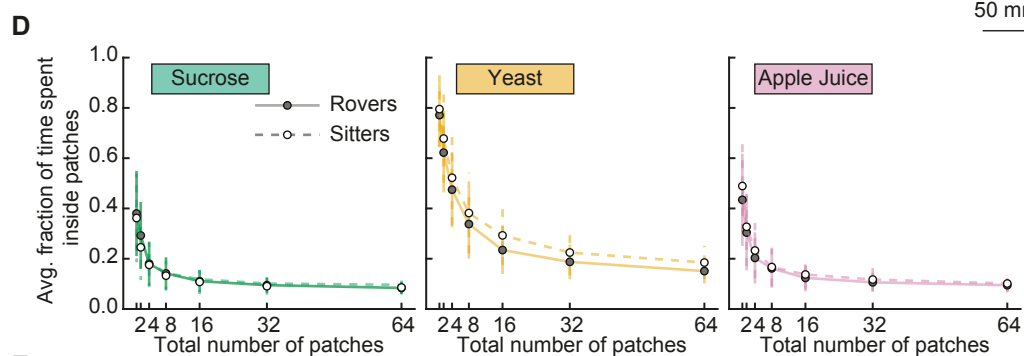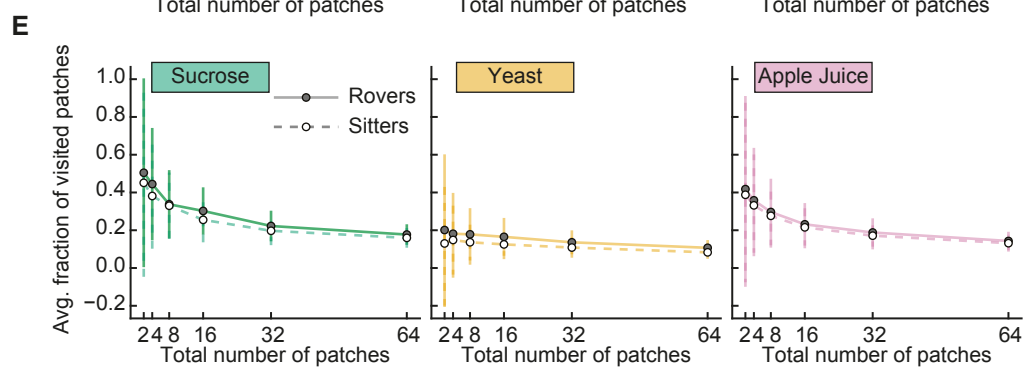

Supplement: supp [file elife-75826-supp-v1.zip]

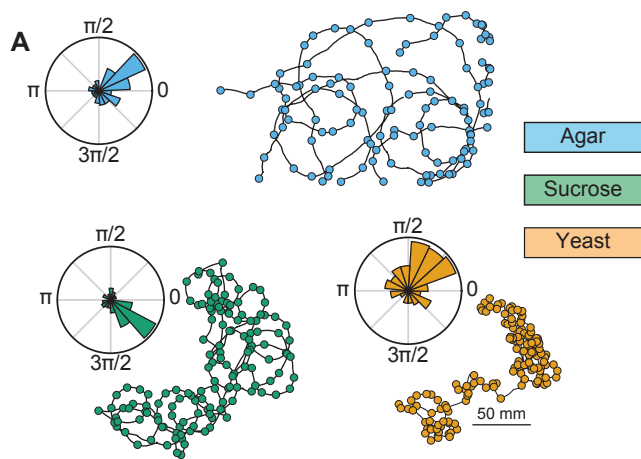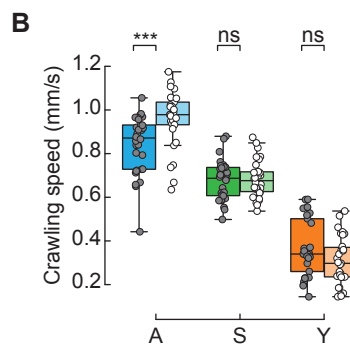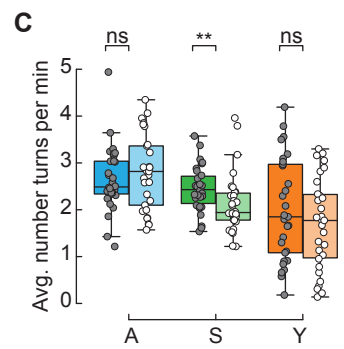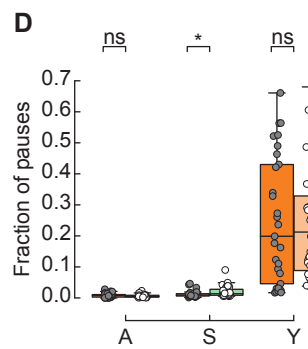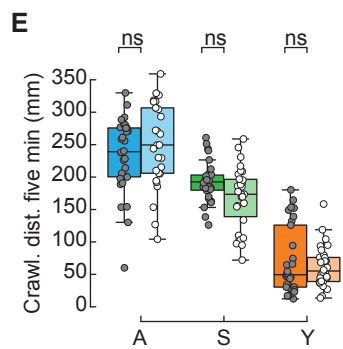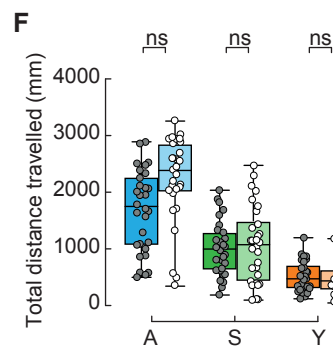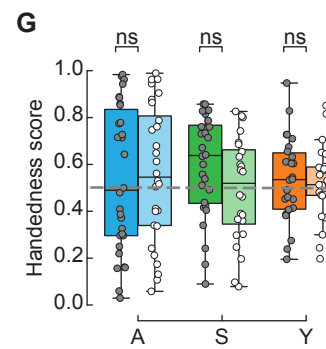

Supplement: supp [file elife-75826-supp-v1.zip]

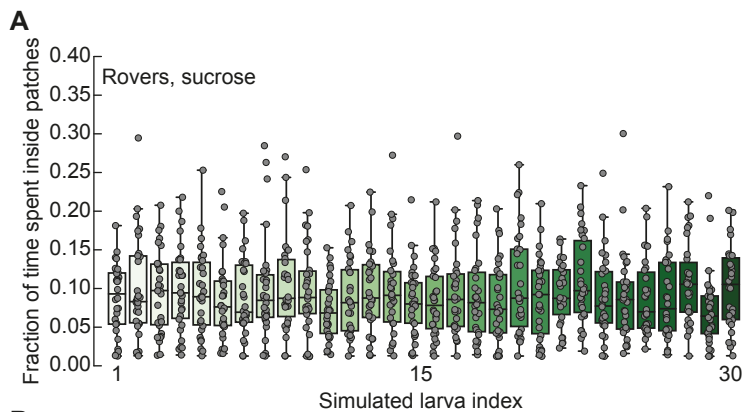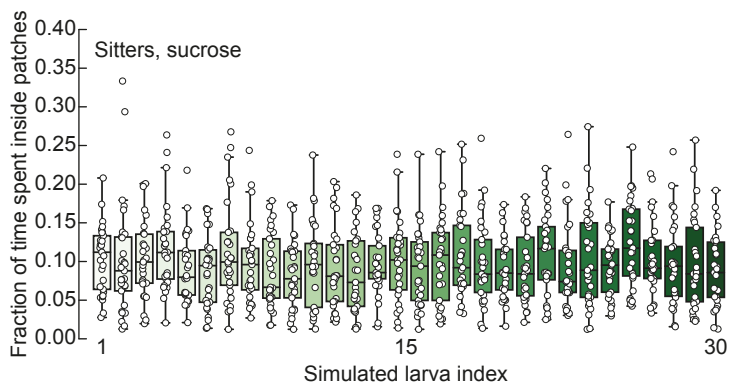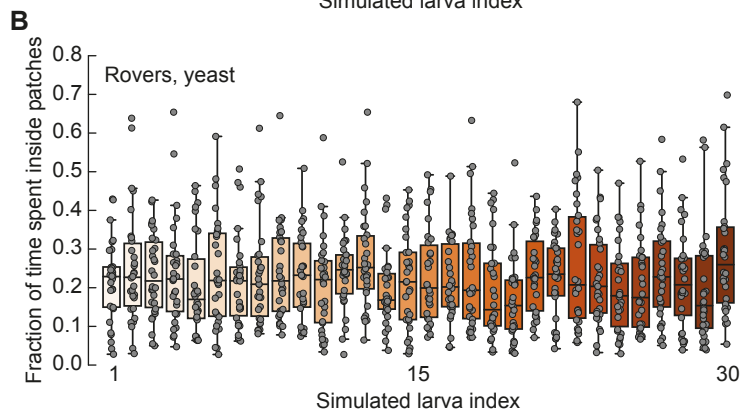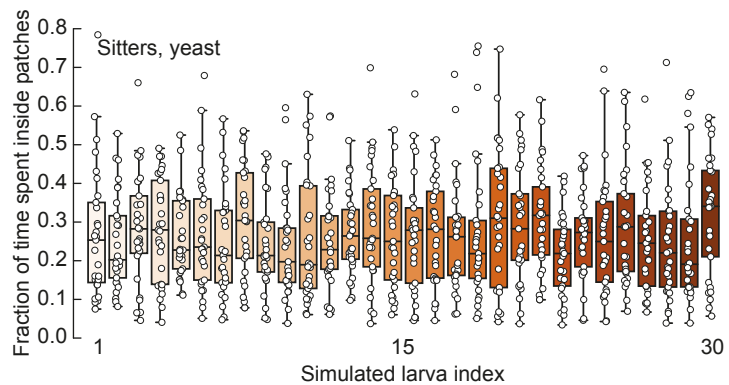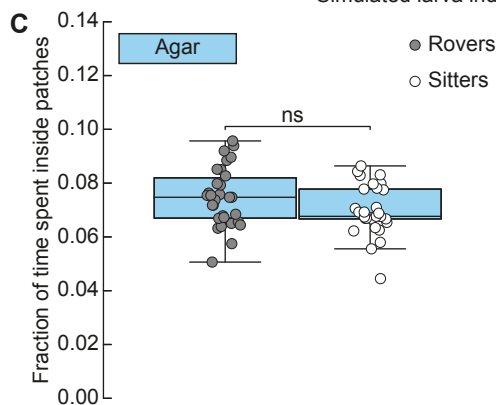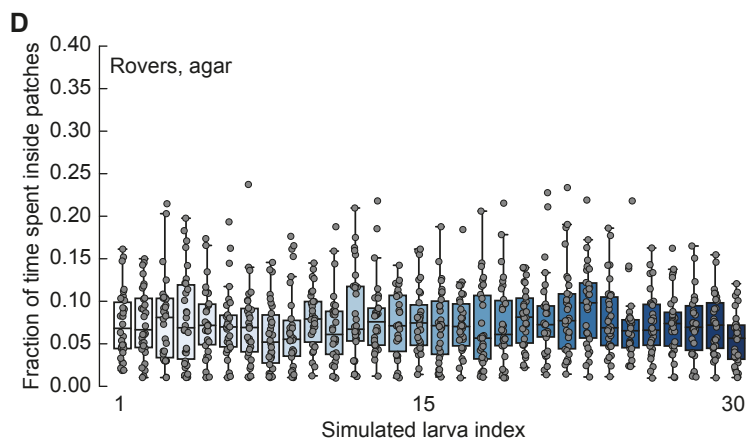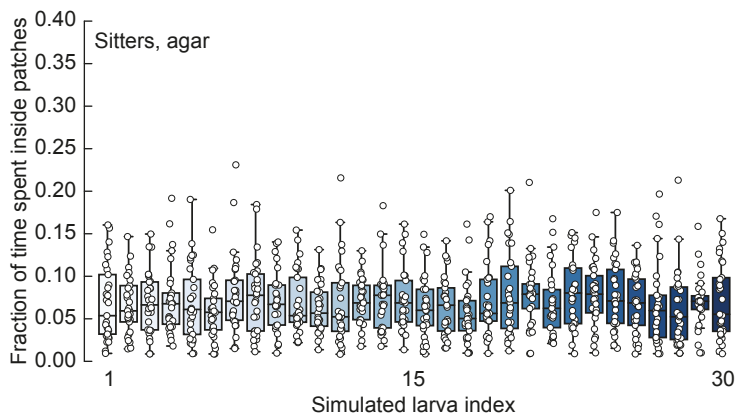

Supplement: supp [file elife-75826-supp-v1.zip]

**A**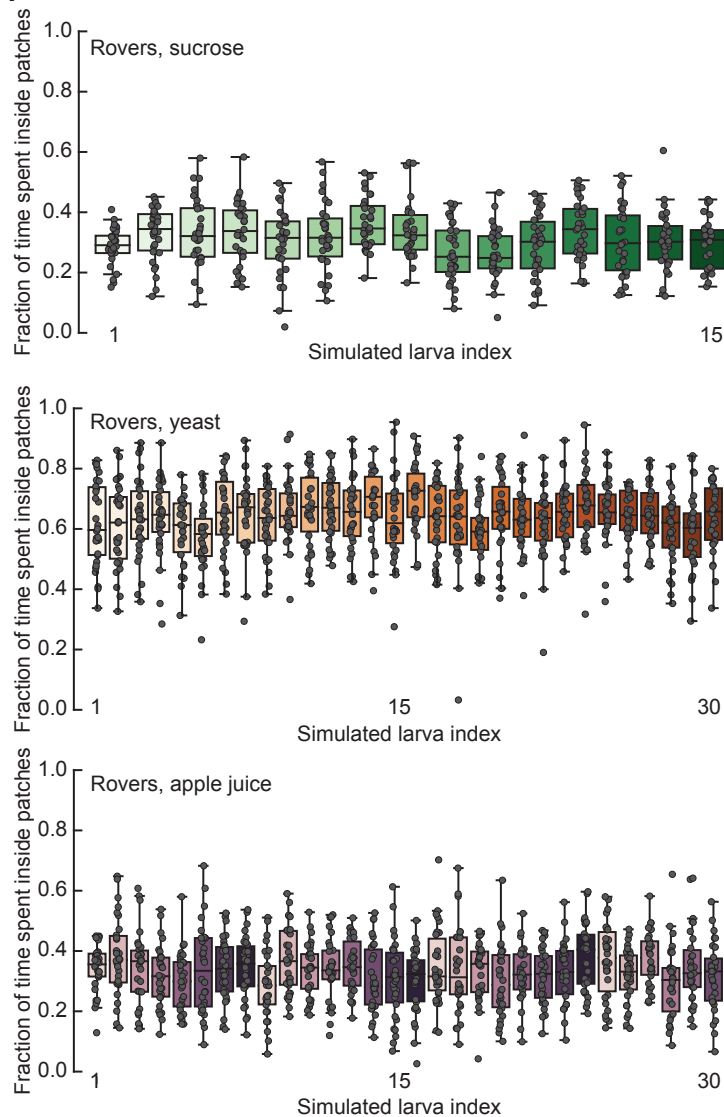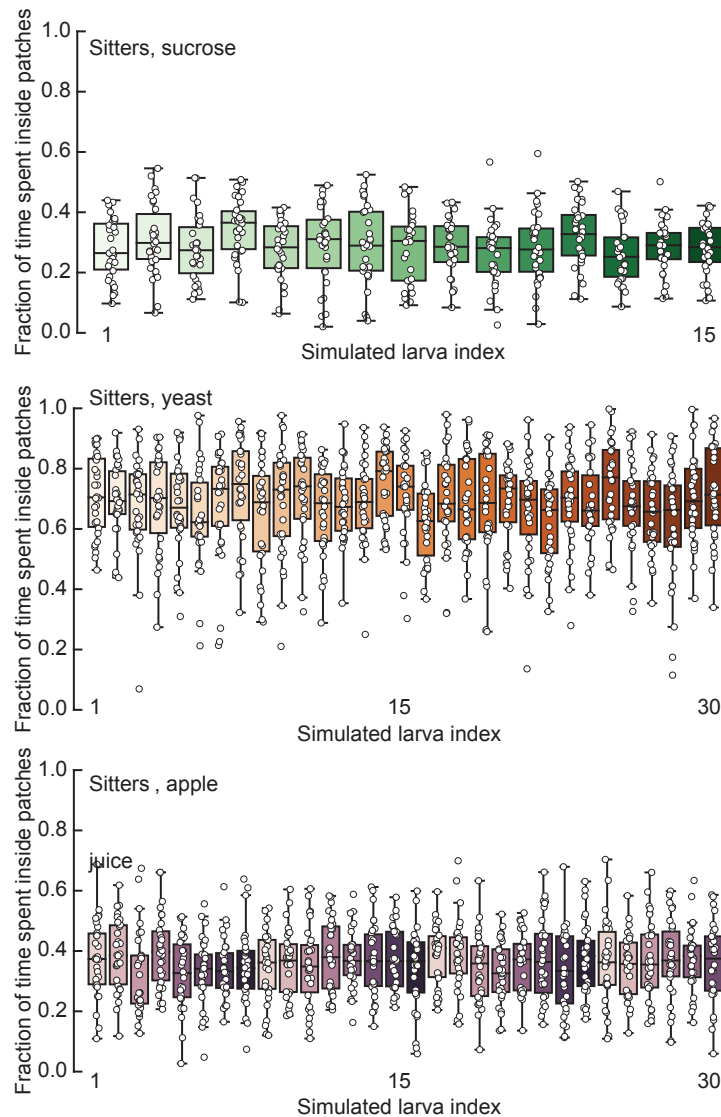**B**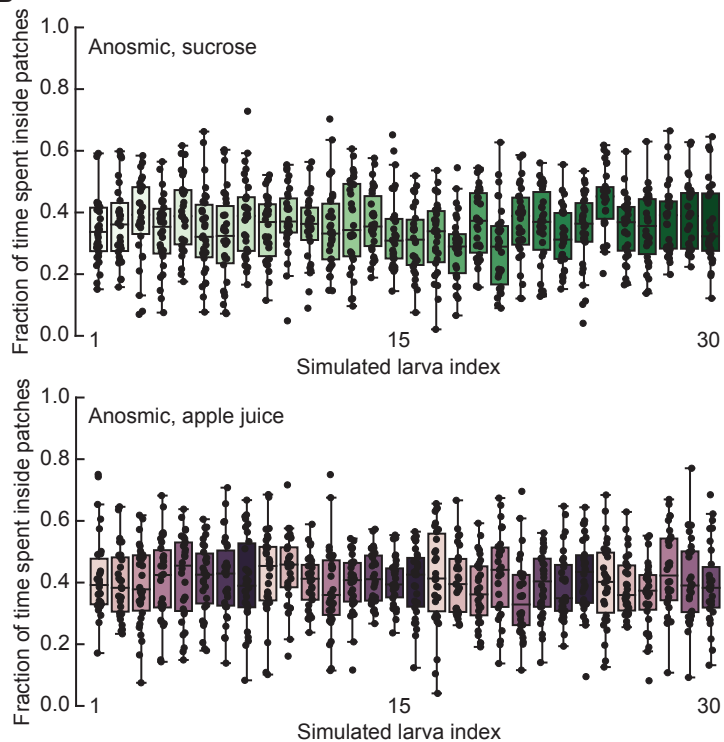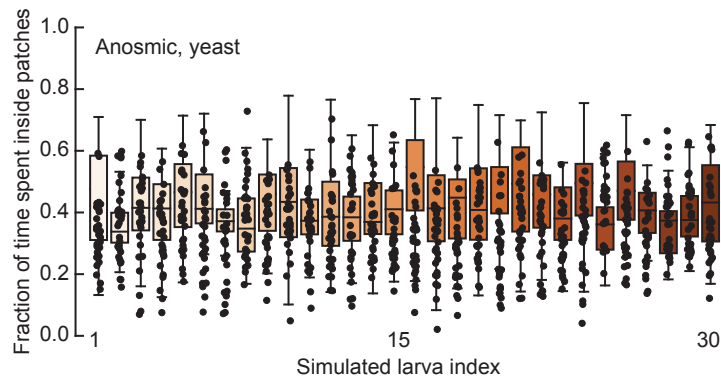**C**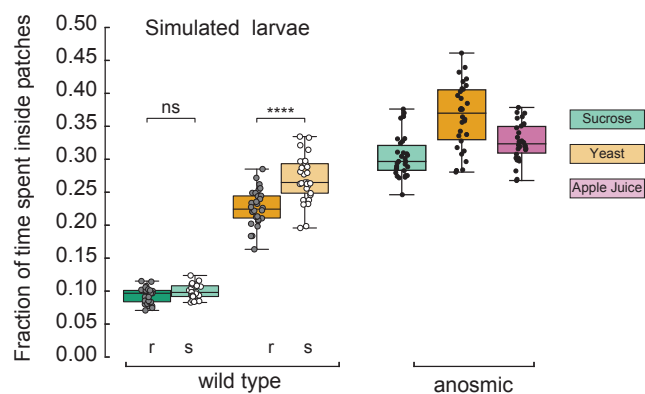

Supplement: supp [file elife-75826-supp-v1.zip]

**A**

- inward turn
- outward turn

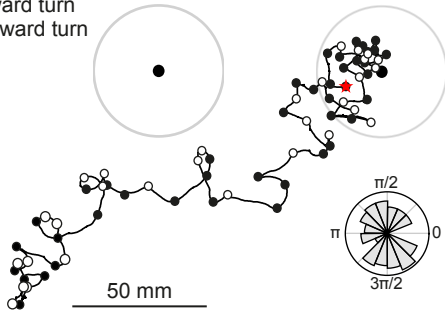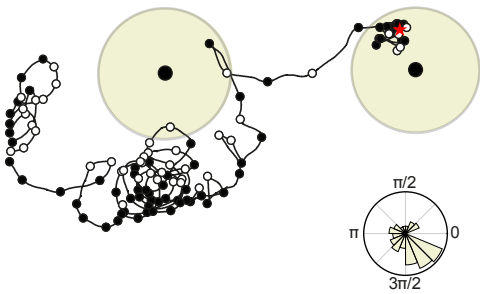

Outside patches:

Agar

Inside patches:

Agar

Gel

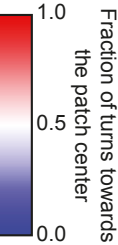

**B**

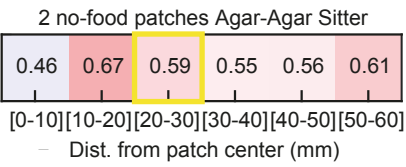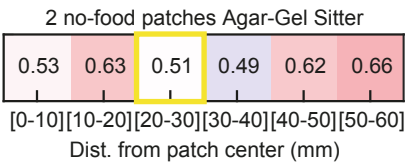

Supplement: supp [file elife-75826-supp-v1.zip]
